# Supplementary material for: NOTCH3 p.Arg1231Cys is Markedly Enriched in South Asians and Associated with Stroke
Source: bioRxiv or medRxiv preprint supplement (doi:10.1101/2023.10.05.23296511), 2024-07-09
Supplement: Supplementary file [file media-1.pdf]

## Supplementary Information

for

*NOTCH3* p.Arg1231Cys is Markedly Enriched in South Asians and Associated with Stroke

### Authors

Juan L. Rodriguez-Flores<sup>1</sup>, Shareef Khalid<sup>2,3</sup>, Neelroop Parikshak<sup>1</sup>, Asif Rasheed<sup>3</sup>, Bin Ye<sup>1</sup>, Manav Kapoor<sup>1</sup>, Joshua Backman<sup>1</sup>, Farshid Sepehrband<sup>1</sup>, Silvio Alessandro DiGioia<sup>4</sup>, Sahar Gelfman<sup>1</sup>, Tanima De<sup>1</sup>, Nilanjana Banerjee<sup>1</sup>, Deepika Sharma<sup>1</sup>, Hector Martinez<sup>4</sup>, Sofia Castaneda<sup>5</sup>, David D'Ambrosio<sup>4</sup>, Xingmin A. Zhang<sup>1</sup>, Pengcheng Xun<sup>4</sup>, Ellen Tsai<sup>6</sup>, I-Chun Tsai<sup>4</sup>, Regeneron Genetics Center<sup>1</sup>, Maleeha Zaman Khan<sup>3</sup>, Muhammad Jahanzaib<sup>3</sup>, Muhammad Rehan Mian<sup>3</sup>, Muhammad Bilal Liaqat<sup>3</sup>, Khalid Mahmood<sup>7</sup>, Tanvir Us Salam<sup>8</sup>, Muhammad Hussain<sup>8</sup>, Javed Iqbal<sup>9</sup>, Faizan Aslam<sup>10</sup>, Michael N. Cantor<sup>1</sup>, Gannie Tzoneva<sup>1</sup>, John Overton<sup>1</sup>, Jonathan Marchini<sup>1</sup>, Jeff Reid<sup>1</sup>, Aris Baras<sup>1</sup>, Niek Verweij<sup>1</sup>, Luca A. Lotta<sup>1</sup>, Giovanni Coppola<sup>1</sup>, Katia Karalis<sup>1</sup>, Aris Economides<sup>1</sup>, Sergio Fazio<sup>4</sup>, Wolfgang Liedtke<sup>4</sup>, John Danesh<sup>11</sup>, Ayeesha Kamal<sup>12</sup>, Philippe Frossard<sup>3</sup>, Thomas Coleman<sup>1</sup>, Alan R. Shuldiner<sup>1</sup>, Danish Saleheen<sup>2,3</sup>

### Affiliations

- <sup>1</sup>. Regeneron Genetics Center, Regeneron Pharmaceuticals Inc, Tarrytown, NY, USA
- <sup>2</sup>. Columbia University, New York, NY, USA
- <sup>3</sup>. Center for Non-Communicable Diseases, Karachi, Pakistan
- <sup>4</sup>. Regeneron Pharmaceuticals Inc, Tarrytown, NY, USA
- <sup>5</sup>. Rye Country Day School, Rye, NY, USA
- <sup>6</sup>. University of California at Los Angeles, Los Angeles, CA, USA
- <sup>7</sup>. Dow University of Health Sciences and Civil Hospital, Karachi, Pakistan
- <sup>8</sup>. Lahore General Hospital, Lahore, Pakistan
- <sup>9</sup>. Department of Neurology, Allied Hospital, Faisalabad, Pakistan.
- <sup>10</sup>. Department of Neurology, Aziz Fatima Hospital, Faisalabad, Pakistan.
- <sup>11</sup>. Department of Public Health and Primary Care, University of Cambridge, Cambridge, UK.
- <sup>12</sup>. Section of Neurology, Department of Medicine, Aga Khan University, Karachi, Pakistan.

### Correspondence

Danish Saleheen, danish.saleheen@cncdpc.com  
Alan Shuldiner, alan.shuldiner@regeneron.com

**Table of Contents**

Supplementary Data  
Supplementary Tables  
Supplementary Figures  
Supplementary References  
Supplementary Figures

## Supplementary Data

### Population Genetic Analysis

In order to better understand the population frequencies of p.Arg1231Cys variant and its implications for stroke risk across South Asia (SAS) and neighboring West Asia / North Africa (also referred to as the Greater Middle East, abbreviated GME), a regional survey of p.Arg1231Cys was conducted. For these analyses, public datasets such as 1000 Genomes Phase 3 [1], GnomAD [2], Greater Middle East (GME) Variome [3], Iranome [4], and QChip Knowledgebase [5] were used. p.Arg1231Cys was enriched (AAF > 0.001) in most GME and SAS populations sampled.

- QChip Knowledgebase, Qatar (AAF = 0.0075)
- GME Variome (AAF = 0.004)
  - Allele Counts (RR:RA:AA)
    - Northwest Africa (98:01:00), AAF = 0.0051
    - Northeast Africa (367:01:00); AAF = 0.0014
    - Arabian Peninsula (168:03:00); AAF = 0.0088
    - Israel (10:00:00); AAF = 0.0
    - Syrian Desert (58:00:00); AAF = 0.0
    - Turkish Peninsula (163:01:00); AAF = 0.003
    - Central Asia (130:02:00); AAF = 0.0076
- Iranome
  - Lur (AAF = 0.01)
  - Baloch (AAF = 0.005)
  - Kurd (AAF = 0.005)
  - Persian (AF = 0.005)
  - Turkmen (AF = 0.005)
- GnomAD, Pooled SAS (AAF=0.00536)
- 1000 Genomes Phase 3
  - Aggregate SAS (AAF=0.0041)
  - GIH, Gujarati Indians in Houston, USA (AAF = 0.0049)
  - ITU, Indian Telugu in the UK (AAF=0.0049)
  - PJJ, Punjabi in Lahore, Pakistan (AAF= 0.0052)
  - STU, Sri Lankan Tamil in the UK (AAF= 0.0049)
  - BEB, Bengali in Bangladesh (not detected)
- UKB Participants born in SAS or GME (n > 100)
  - SAS (aggregate AAF = 0.0042),
    - Afghanistan (AAF = 0.005)
    - Pakistan (AAF = 0.003)
    - India (AAF = 0.0041)
  - GME (aggregate AAF = 0.0031)
    - Egypt (not detected)
    - Turkey (AAF = 0.0029)
    - Iran (AAF = 0.0049)

### Variant Prevalence in Pakistani Population Clusters

Combined analysis of 37 K exomes from the PGR, 1000G and UKB identified three major clusters of Pakistanis, and ethnic/caste data was used to label them as Punjab/Rajput which clustered with 1000G Punjab; Ansari, which formed a distinct cluster closer to populations from Eastern India; and Baloch/Pathan which clustered with Afghans (**Supplementary Figure 5, Supplementary Table 9**). The variant was enriched (AAF > 0.005) in all three clusters.

- Baloch/Pathan (AAF = 0.0074)
- Punjab/Rajput (AAF = 0.006)
- Ansari (AAF = 0.0056)

**Supplementary Tables**

**Supplementary Table 1. ExWAS in PGR Discovery Cohort across 5 Stroke Phenotypes<sup>1</sup>.**

| # | Phenotype                                    | N Cases <sup>1</sup> | N Controls | Total  |
|---|----------------------------------------------|----------------------|------------|--------|
| 1 | Stroke                                       | 5,135                | 26,602     | 31,737 |
| 2 | Ischemic                                     | 2,619                | 26,602     | 29,221 |
| 3 | Intracerebral hemorrhage                     | 1,533                | 26,602     | 28,135 |
| 4 | Subcortical intracerebral hemorrhage         | 1,388                | 26,602     | 27,990 |
| 5 | Partial anterior circulation infarcts (PACI) | 1,274                | 26,602     | 27,876 |

- <sup>1</sup>. Shown are 5 stroke phenotypes that were ascertained for cases using TOAST [6] and Oxfordshire [7] criteria. From left-to-right is the phenotype name, detailed description, number of cases, number of controls, and total sample size among the PGR discovery cohort participants.
- <sup>2</sup>. While other ischemic stroke subtypes were identified using TOAST and Oxfordshire criteria, this study was limited to subtypes with at least 500 cases. Other ischemic stroke subtypes (including posterior circulation infarction, total anterior circulation infarct, lacunar infarct, cardioembolism, large artery atherosclerosis, and small artery atherosclerosis) had fewer than 500 cases. Using the University of Michigan Genetic Association Study Power Calculator [8], we estimated power over a range of alternate allele frequency (AAF) and genotype relative risk (GRR) values. Looking across a range of AAF's, we estimate that a variant would need to have 0.11 AAF to achieve 80% power with 500 cases and 26,602 controls, significance level of  $5.0 \times 10^{-8}$ , disease prevalence of 0.0011 and a genotype relative risk of 2.0. Looking across a range of GRRs, we estimate that a variant with a AAF of 0.01 would need to have a GRR of 6.0 to achieve 80% power with 500 cases and 26,602 controls, significance level of  $5.0 \times 10^{-8}$ , disease prevalence of 0.0011. With less than 500 cases, power to detect association at the genome-wide level of significance ( $5.0 \times 10^{-8}$ ) would require a very large effect size (e.g. 6.0).

**Supplementary Table 2. Association Summary Statistics for p.Arg1231Cys *NOTCH3* and 5 Stroke Phenotypes in PGR Discovery Cohort<sup>1</sup>.**

| <b>Phenotype<br/>(ordered by increasing odds ratio)</b> | <b>Odds Ratio<br/>(95%<br/>Confidence<br/>Interval)</b> | <b>P value</b> | <b>AAF</b> | <b>Num<br/>Cases</b> | <b>Num<br/>Controls</b> |
|---------------------------------------------------------|---------------------------------------------------------|----------------|------------|----------------------|-------------------------|
| Ischemic                                                | 1.80 (1.23, 2.64)                                       | 2.49E-03       | 5.64E-03   | 2540 42 2            | 25619 271 2             |
| Partial anterior circulation infarcts (PACI)            | 1.99 (1.23, 3.22)                                       | 4.84E-03       | 5.56E-03   | 1227 25 1            | 25619 271 2             |
| Stroke                                                  | 2.2 (1.7, 2.9)                                          | 4.93E-08       | 6.10E-03   | 4939 98 3            | 25619 271 2             |
| Intracerebral hemorrhage                                | 3.17 (2.12, 4.73)                                       | 1.79E-08       | 5.82E-03   | 1451 44 0            | 25619 271 2             |
| Subcortical intracerebral hemorrhage                    | 3.39 (2.26, 5.1)                                        | 3.87E-09       | 5.84E-03   | 1313 43 0            | 25619 271 2             |

- <sup>1</sup>. Shown are ExWAS summary statistics for 5 stroke phenotypes and the *NOTCH3* p.Arg1231Cys variant. From left-to-right is the phenotype, effect size, effect size 95% confidence interval (lower, upper), p value, alternate allele frequency (AAF), cases count subdivided by genotype (homozygous reference | heterozygous | homozygous alternate) and controls count subdivided by genotype (homozygous reference | heterozygous | homozygous alternate).

**Supplementary Table 3. Phenome-wide Association Summary Statistics for p.Arg1231Cys *NOTCH3* and Comorbidities and Related Binary Phenotypes in PGR Discovery Cohort<sup>1</sup>.**

| Phenotype (Binary Traits)                                                            | Odds Ratio                | P value  | AAF      | Cases       | Controls    |
|--------------------------------------------------------------------------------------|---------------------------|----------|----------|-------------|-------------|
|                                                                                      | (95% Confidence Interval) |          |          |             |             |
| Subcortical intracerebral hemorrhage                                                 | 3.4 (2.3, 5.1)            | 3.87E-09 | 5.80E-03 | 1313 43 0   | 25619 271 2 |
| Intracerebral hemorrhage diagnosis                                                   | 3.2 (2.1, 4.7)            | 1.80E-08 | 5.80E-03 | 1451 44 0   | 25619 271 2 |
| Stroke                                                                               | 2.2 (1.7, 2.9)            | 4.93E-08 | 6.10E-03 | 4939 98 3   | 25619 271 2 |
| Partial anterior circulation infarcts (PACI)                                         | 2 (1.2, 3.2)              | 4.85E-03 | 5.60E-03 | 1227 25 1   | 25619 271 2 |
| Lacunar cerebral infarct (LACI)                                                      | 2.9 (1.3, 6.3)            | 7.05E-03 | 5.40E-03 | 364 8 1     | 25619 271 2 |
| Stroke, undetermined cause                                                           | 1.9 (1.2, 3)              | 7.81E-03 | 5.50E-03 | 1395 26 1   | 25619 271 2 |
| Pain in lower extremities while walking                                              | 2.4 (1.2, 4.7)            | 1.26E-02 | 6.80E-03 | 454 11 0    | 20286 265 4 |
| Right or left ventricular hypertrophy diagnosis, S in V3 + R in avl > 20 mm in women | 2.7 (1.2, 6)              | 1.27E-02 | 6.10E-03 | 286 9 0     | 7908 92 0   |
| Stroke diagnosis self-reported                                                       | 1.9 (1.1, 3.1)            | 1.30E-02 | 6.90E-03 | 856 21 0    | 20540 271 4 |
| Self-reported myocardial infarction (MI)                                             | 0.69 (0.51, 0.94)         | 1.85E-02 | 5.90E-03 | 5319 45 0   | 30641 376 5 |
| Small artery atherosclerosis, TOAST classification                                   | 2.6 (1.1, 5.8)            | 2.30E-02 | 5.40E-03 | 309 7 1     | 25619 271 2 |
| Lower extremities pain gets better on resting                                        | 2.7 (1.1, 6.5)            | 2.90E-02 | 8.30E-03 | 277 10 0    | 7192 110 3  |
| Right or left ventricular hypertrophy diagnosis, S in lead V1 + R in V5/V6 > 35mm    | 1.7 (1, 2.9)              | 3.49E-02 | 6.20E-03 | 839 18 0    | 16918 198 3 |
| Stroke family history                                                                | 1.6 (1, 2.4)              | 4.07E-02 | 5.90E-03 | 1406 25 0   | 34993 398 5 |
| Self-reported heart failure (HF), first occurrence                                   | 0.63 (0.41, 0.98)         | 4.17E-02 | 4.40E-03 | 4173 25 0   | 8439 86 1   |
| Clopidogrel medication for heart disease                                             | 0.63 (0.4, 0.99)          | 4.36E-02 | 5.90E-03 | 2248 17 0   | 31074 373 5 |
| Hypertension family history, mother                                                  | 0.7 (0.48, 1)             | 5.69E-02 | 5.80E-03 | 2683 22 0   | 31500 376 3 |
| Hypertension family history, father                                                  | 0.68 (0.46, 1)            | 5.75E-02 | 5.80E-03 | 2348 18 0   | 31841 380 3 |
| Type of myocardial infarction (MI), anterior                                         | 1.5 (0.95, 2.3)           | 8.67E-02 | 5.90E-03 | 1819 29 0   | 34580 394 5 |
| Total anterior circulation infarcts (TACI)                                           | 0.41 (0.15, 1.1)          | 8.81E-02 | 5.20E-03 | 441 1 0     | 25619 271 2 |
| Diabetes family history, mother                                                      | 0.75 (0.54, 1.1)          | 1.02E-01 | 5.80E-03 | 3262 29 0   | 30927 369 3 |
| Self-reported history of diabetes                                                    | 0.84 (0.67, 1.1)          | 1.47E-01 | 5.90E-03 | 8634 86 1   | 27270 335 3 |
| Posterior circulation infarcts (POCI)                                                | 2 (0.78, 5.1)             | 1.50E-01 | 5.40E-03 | 469 8 0     | 25619 271 2 |
| Stroke family history, father                                                        | 1.7 (0.81, 3.6)           | 1.59E-01 | 5.80E-03 | 615 11 0    | 33575 387 3 |
| Intracranial large artery atherosclerosis (LAA)                                      | 2.8 (0.66, 11)            | 1.64E-01 | 5.30E-03 | 270 4 0     | 25619 271 2 |
| Large artery atherosclerosis (LAA)                                                   | 1.9 (0.64, 5.8)           | 2.47E-01 | 5.30E-03 | 366 6 0     | 25619 271 2 |
| Type of myocardial infarction (MI), inferior                                         | 0.68 (0.35, 1.3)          | 2.48E-01 | 5.90E-03 | 972 6 0     | 35427 417 5 |
| Self-reported depression                                                             | 0.36 (0.059, 2.2)         | 2.68E-01 | 4.50E-03 | 128 0 0     | 12490 112 1 |
| Stroke family history, mother                                                        | 1.6 (0.7, 3.5)            | 2.82E-01 | 5.80E-03 | 530 9 0     | 33659 389 3 |
| Heart failure family history                                                         | 1.8 (0.59, 5.5)           | 3.03E-01 | 5.90E-03 | 284 5 0     | 36115 418 5 |
| Myocardial infarction family history                                                 | 1.1 (0.86, 1.5)           | 3.76E-01 | 5.90E-03 | 5669 69 1   | 30730 354 4 |
| Myocardial infarction                                                                | 0.91 (0.72, 1.1)          | 4.27E-01 | 5.70E-03 | 11386 118 1 | 21370 254 3 |
| Diabetes controlled or not                                                           | 1.4 (0.62, 3)             | 4.47E-01 | 1.00E-02 | 815 16 1    | 610 12 0    |
| Smoked more than 100 cigarette or beedies                                            | 0.74 (0.34, 1.6)          | 4.51E-01 | 5.80E-03 | 6406 72 1   | 824 9 1     |
| Heart failure (HF) case vs control                                                   | 0.86 (0.57, 1.3)          | 4.54E-01 | 4.50E-03 | 7702 63 0   | 4921 49 1   |
| Myocardial infarction family history, mother                                         | 1.2 (0.75, 1.8)           | 5.14E-01 | 5.80E-03 | 1981 26 0   | 32208 372 3 |
| TOAST classification, cardio embolism                                                | 0.69 (0.21, 2.2)          | 5.29E-01 | 5.30E-03 | 412 2 0     | 25619 271 2 |
| Self-reported father and mother are first degree cousin relative                     | 0.94 (0.75, 1.2)          | 6.00E-01 | 5.90E-03 | 8630 94 2   | 26401 315 3 |
| Diabetes family history, father                                                      | 0.9 (0.6, 1.4)            | 6.06E-01 | 5.80E-03 | 2217 23 0   | 31972 375 3 |
| Self-reported high cholesterol                                                       | 0.73 (0.22, 2.5)          | 6.10E-01 | 4.50E-03 | 310 2 0     | 12308 110 1 |
| Myocardial infarction family history, father                                         | 1.1 (0.74, 1.6)           | 6.69E-01 | 5.80E-03 | 2595 32 0   | 31590 366 3 |
| Tobacco use                                                                          | 0.96 (0.77, 1.2)          | 7.03E-01 | 5.90E-03 | 13161 143 1 | 22679 276 3 |
| Type of myocardial infarction (MI), anterior and anteroseptal                        | 1.3 (0.27, 6.6)           | 7.18E-01 | 5.90E-03 | 179 2 0     | 36220 421 5 |
| Self-reported hypertension                                                           | 0.97 (0.79, 1.2)          | 7.46E-01 | 5.80E-03 | 14958 170 1 | 20756 244 3 |
| Previous transient ischemic attack (TIA)                                             | 1.2 (0.26, 5.1)           | 8.40E-01 | 8.30E-03 | 125 2 0     | 7205 116 3  |
| Heart failure family history, mother                                                 | 1.1 (0.13, 8.3)           | 9.62E-01 | 4.50E-03 | 105 1 0     | 12515 111 1 |

<sup>1</sup>. Shown are ExWAS summary statistics for stroke comorbidities and related binary phenotypes and the *NOTCH3* p.Arg1231Cys variant in the PGR discovery cohort. From left-to-right is the phenotype name, odds ratio (OR), OR effect size 95% confidence interval (lower, upper), p value, alternate allele frequency (AAF), cases count subdivided by genotype (homozygous reference | heterozygous | homozygous alternate) and controls count subdivided by genotype (homozygous reference | heterozygous | homozygous alternate).

**Supplementary Table 4. Phenome-wide Association Summary Statistics for p.Arg1231Cys *NOTCH3* and Comorbidities and Related Quantitative Phenotypes in PGR Discovery Cohort<sup>1</sup>.**

| Phenotype (Quantitative Trait)                         | Beta (95% Confidence Interval) | P value  | AAF      | Sample size | Units   |
|--------------------------------------------------------|--------------------------------|----------|----------|-------------|---------|
| Sudden death age, father                               | -1 (-1.8, -0.3)                | 6.18E-03 | 6.50E-03 | 382 5 0     | Years   |
| Hemoglobin A1C                                         | 0.24 (0.04, 0.44)              | 1.86E-02 | 7.90E-03 | 5634 88 1   | %       |
| Waist hip ratio                                        | -0.087 (-0.18, 0.01)           | 7.90E-02 | 6.00E-03 | 31972 380 3 | Decimal |
| Age at diagnosis of myocardial infarction (MI)         | -0.29 (-0.63, 0.04)            | 8.44E-02 | 3.50E-03 | 4690 33 0   | Years   |
| Stroke diagnosis age, mother                           | -0.47 (-1, 0.067)              | 8.59E-02 | 9.30E-03 | 476 9 0     | Years   |
| Earliest sudden death age in family                    | -0.45 (-1, 0.13)               | 1.28E-01 | 5.50E-03 | 804 9 0     | Years   |
| Hypertension diagnosis age, brother                    | 0.33 (-0.11, 0.77)             | 1.37E-01 | 5.70E-03 | 1301 13 1   | Years   |
| Age quit paan                                          | 0.59 (-0.19, 1.4)              | 1.37E-01 | 4.40E-03 | 569 5 0     | Years   |
| Systolic blood pressure                                | 0.079 (-0.026, 0.18)           | 1.40E-01 | 5.90E-03 | 27322 321 2 | mmHg    |
| Age started smoking                                    | 0.15 (-0.056, 0.35)            | 1.57E-01 | 5.80E-03 | 7177 82 1   | Years   |
| Diastolic blood pressure                               | 0.073 (-0.028, 0.17)           | 1.57E-01 | 5.90E-03 | 27679 328 2 | mmHg    |
| Myocardial infarction diagnosis age, brother           | -0.2 (-0.55, 0.15)             | 2.56E-01 | 7.40E-03 | 1657 23 1   | Years   |
| Triglycerides                                          | -0.047 (-0.14, 0.046)          | 3.20E-01 | 5.90E-03 | 34425 402 4 | Mg/dl   |
| Diabetes diagnosis age, brother                        | -0.2 (-0.63, 0.24)             | 3.73E-01 | 4.80E-03 | 1740 17 0   | Years   |
| Age quit naswar                                        | 0.21 (-0.29, 0.71)             | 4.09E-01 | 1.70E-02 | 140 5 0     | Years   |
| Heart failure (HF) diagnosis age                       | -0.17 (-0.6, 0.25)             | 4.32E-01 | 2.70E-03 | 3743 20 0   | Years   |
| Stroke diagnosis age, father                           | -0.19 (-0.73, 0.34)            | 4.78E-01 | 7.90E-03 | 558 9 0     | Years   |
| Diabetes diagnosis age, mother                         | -0.13 (-0.5, 0.24)             | 4.85E-01 | 4.10E-03 | 2994 25 0   | Years   |
| Earliest heart failure diagnosis age in family         | -0.24 (-0.95, 0.46)            | 5.03E-01 | 9.30E-03 | 264 5 0     | Years   |
| Hypertension diagnosis age, sister                     | 0.18 (-0.36, 0.72)             | 5.07E-01 | 5.70E-03 | 951 11 0    | Years   |
| Age quit smoking                                       | 0.16 (-0.31, 0.63)             | 5.08E-01 | 5.10E-03 | 1443 15 0   | Years   |
| Earliest hypertension diagnosis age in family          | 0.087 (-0.19, 0.36)            | 5.33E-01 | 4.50E-03 | 5254 46 1   | Years   |
| High-density lipoprotein                               | -0.029 (-0.12, 0.062)          | 5.33E-01 | 5.90E-03 | 34400 402 4 | Mg/dl   |
| Earliest stroke diagnosis age in family                | -0.12 (-0.52, 0.28)            | 5.57E-01 | 8.10E-03 | 1275 21 0   | Years   |
| Creatinine level in blood                              | -0.022 (-0.11, 0.07)           | 6.37E-01 | 5.60E-03 | 32559 360 3 | Mg/dl   |
| Stroke diagnosis age                                   | -0.1 (-0.54, 0.33)             | 6.40E-01 | 1.40E-02 | 539 15 0    | Years   |
| Low-density lipoprotein (LDL) calculated               | -0.022 (-0.12, 0.073)          | 6.49E-01 | 5.90E-03 | 33742 397 4 | mg/dl   |
| Myocardial infarction diagnosis age, sister            | -0.14 (-0.75, 0.47)            | 6.55E-01 | 6.60E-03 | 601 8 0     | Years   |
| Number of Cigarettes / Beedies per day                 | 0.043 (-0.15, 0.24)            | 6.70E-01 | 5.90E-03 | 6757 79 1   | Integer |
| Age started huqqa chillum                              | 0.098 (-0.38, 0.58)            | 6.86E-01 | 1.20E-02 | 294 5 1     | Years   |
| Diabetes diagnosis age, father                         | 0.08 (-0.32, 0.48)             | 6.95E-01 | 4.90E-03 | 2015 20 0   | Years   |
| Cholesterol                                            | -0.019 (-0.11, 0.075)          | 6.97E-01 | 5.90E-03 | 34552 404 4 | mg/dl   |
| Hypertension diagnosis age, mother                     | 0.081 (-0.33, 0.49)            | 6.98E-01 | 4.30E-03 | 2416 21 0   | Years   |
| Earliest myocardial infarction diagnosis age in family | -0.044 (-0.27, 0.18)           | 6.99E-01 | 6.30E-03 | 5420 67 1   | Years   |
| Age at diagnosis of diabetes                           | -0.042 (-0.27, 0.18)           | 7.12E-01 | 5.00E-03 | 7272 74 0   | Years   |
| Hypertension diagnosis age, father                     | -0.077 (-0.54, 0.39)           | 7.48E-01 | 3.80E-03 | 2114 16 0   | Years   |
| Earliest diabetes diagnosis age in family              | -0.032 (-0.27, 0.21)           | 7.92E-01 | 5.00E-03 | 6118 62 0   | Years   |
| Myocardial infarction diagnosis age, mother            | -0.047 (-0.42, 0.32)           | 8.03E-01 | 6.20E-03 | 1898 24 0   | Years   |
| Diabetes diagnosis age, sister                         | 0.052 (-0.46, 0.56)            | 8.44E-01 | 4.20E-03 | 1545 13 0   | Years   |
| Age started gutka                                      | -0.037 (-0.56, 0.49)           | 8.90E-01 | 8.70E-03 | 623 11 0    | Years   |
| Myocardial infarction diagnosis age, father            | 0.015 (-0.33, 0.36)            | 9.34E-01 | 5.60E-03 | 2477 28 0   | Years   |
| Age at diagnosis of hypertension                       | -0.0067 (-0.17, 0.15)          | 9.35E-01 | 5.80E-03 | 12072 139 1 | Years   |
| Age started naswar                                     | 0.019 (-0.49, 0.53)            | 9.44E-01 | 5.50E-03 | 997 11 0    | Years   |
| Glucose                                                | -0.0027 (-0.098, 0.092)        | 9.55E-01 | 5.90E-03 | 33746 394 3 | mg/dl   |
| Age started paan                                       | -0.0078 (-0.38, 0.36)          | 9.67E-01 | 5.60E-03 | 2109 24 0   | Years   |

<sup>1</sup>. Shown are ExWAS summary statistics for stroke comorbidities and the *NOTCH3* p.Arg1231Cys variant in the PGR discovery cohort. From left-to-right is the phenotype name, effect size (regression beta), effect size (95% confidence interval), p value, alternate allele frequency (AAF), and sample size count subdivided by genotype (homozygous reference | heterozygous | homozygous alternate).

**Supplementary Table 5. Inclusion of risk factors in regression model<sup>1</sup>.**

| <b>Phenotype<br/>(in order of increasing odds ratio)</b> | <b>Odds Ratio<br/>(95%<br/>Confidence<br/>Interval)</b> | <b>P value</b> | <b>AAF</b> | <b>Num<br/>Cases</b> | <b>Num<br/>Controls</b> |
|----------------------------------------------------------|---------------------------------------------------------|----------------|------------|----------------------|-------------------------|
| Ischemic                                                 | 1.60 (1.08, 2.38)                                       | 2.04E-02       | 5.52E-03   | 2471 37 2            | 24151 256 0             |
| Partial anterior circulation infarcts (PACI)             | 1.81 (1.11, 2.97)                                       | 1.80E-02       | 5.48E-03   | 1196 23 1            | 24151 256 0             |
| Stroke                                                   | 2.01 (1.49, 2.69)                                       | 3.18E-06       | 6.02E-03   | 4696 90 3            | 24151 256 0             |
| Intracerebral hemorrhage                                 | 2.96 (1.95, 4.5)                                        | 3.64E-07       | 5.76E-03   | 1408 42 0            | 24151 256 0             |
| Subcortical intracerebral hemorrhage                     | 3.19 (2.08, 4.88)                                       | 9.87E-08       | 5.77E-03   | 1273 41 0            | 24151 256 0             |

- <sup>1</sup>. To assess the impact of other risk factors for stroke, statistical analysis was repeated in PGR discovery cohort cases and controls with smoking and hypertension as covariates in the model. Shown are results for association test between *NOTCH3* p.Arg1231Cys and five stroke phenotypes including standard covariates as well as smoking and hypertension. From left to right is the cohort, model, odds ratio (95% confidence interval), p value, alternate allele frequency, and genotype counts among cases and controls (reference homozygotes | heterozygotes | alternate allele homozygotes).



**Supplementary Table 6. Computational Prediction of Variant Deleteriousness<sup>1</sup>.**

| <b>Algorithm</b>             | <b>Score</b> | <b>Interpretation</b> |
|------------------------------|--------------|-----------------------|
| SIFT 4G converted rank score | 0.639        | Deleterious           |
| PolyPhen2 Hum Div            | 0.843        | Possibly Damaging     |
| PolyPhen2 Hum Var            | 0.462        | Possibly Damaging     |
| Mutation Taster Rank Score   | 0.588        | Deleterious           |
| CADD                         | 25.1         | Pathogenic            |

<sup>1</sup>. To computationally assess pathogenicity for *NOTCH3* p.Arg1231Cys, the variant was submitted to online portals for scoring using 5 algorithms. Details of the variant submitted included the GRCh38 coordinates Chr19:15179052, the reference and alternate allele G>A, and the ENSEMBL transcript ID ENST00000263388. Shown is a summary of the output, including the algorithm, the quantitative score reported and the interpretation of the score.

**Supplementary Table 7. *NOTCH3* p.Arg1231Cys Homozygotes in PGR<sup>1</sup>.**

| Cohort <sup>2</sup>  | ID <sup>3</sup> | Age (decade) <sup>4</sup> | Sex <sup>5</sup> | BMI <sup>6</sup> | Stroke | Type of Stroke                             | Migraine | Dementia | Depression | Hypertension | Diabetes | Other          | Family History of CVD | Status at follow up |
|----------------------|-----------------|---------------------------|------------------|------------------|--------|--------------------------------------------|----------|----------|------------|--------------|----------|----------------|-----------------------|---------------------|
| Follow-up            | 1               | 50-59                     | F                | 26.6             | No     |                                            | No       | No       | No         | Yes          | No       | MI, Angina     | HTN                   | Angina              |
| Discovery            | 2               | 40-49                     | M                | NA               | No     |                                            | No       | No       | No         | No           | No       | MI             |                       | Deceased            |
| Discovery            | 3*              | 40-49                     | M                | 26.9             | No     |                                            | No       | No       | No         | Yes          | No       |                |                       | HTN                 |
| Replication          | 4               | 40-49                     | M                | 31.2             | No     |                                            | No       | No       | No         | No           | No       |                |                       |                     |
| Follow-up            | 5               | 50-59                     | M                | 27.2             | No     |                                            | No       | No       | No         | Yes          | No       |                | Stroke, HTN           |                     |
| Replication          | 6               | 50-59                     | M                | NA               | No     |                                            | No       | No       | No         | No           | Yes      | MI             |                       | Sudden death        |
| Discovery            | 7               | 60-69                     | M                | NA               | Yes    | Ischemic stroke, Recurrent lacunar infarct | No       | No       | No         | Yes          | Yes      | MI, Angina     |                       | HTN                 |
| Discovery            | 8               | 70-79                     | M                | 22.5             | Yes    | Ischemic Stroke (PACI)                     | No       | No       | No         | No           | No       |                | HTN<br>MI             |                     |
| Discovery            | 9               | 80-89                     | M                | 22.1             | Yes    | Ischemic Stroke (PACI)                     | No       | No       | No         | Yes          | No       | MI             |                       |                     |
| Callback             | 1               | 30-39                     | F                | 34.6             | No     |                                            |          | No       | No         | Yes          | No       | Stomach issues | MI                    |                     |
| Callback             | 2               | 40-49                     | M                | 26.7             | No     |                                            |          | No       | No         | Yes          | Yes      | SVT            | MI                    |                     |
| Discovery & Callback | 3*              | 50-59                     | M                | 24.2             | No     |                                            |          | No       | No         | Yes          | No       |                |                       |                     |

1. Shown are relevant observations in the medical history of *NOTCH3* p.Arg1231Cys homozygotes identified in exome sequencing of the discovery cohort (top, numbered 1 to 9 by age and gender) or callback within families of exome-sequenced homozygotes (bottom, numbered 1 to 3 by age and gender), including , age, sex, BMI, stroke, type of stroke (if known), migraine with or without aura, dementia, depression, hypertension, diabetes, other family history of cardiovascular diseases, and status at follow up. Proband at the top were identified through exome sequencing of PGR, while homozygotes identified through callback are at the bottom. CVD = cardiovascular disease. HTN = hypertension. MI = myocardial infarction, SVT = supraventricular tachycardia
2. Cohorts include 31 K discovery 30 K replication, 14 K follow-up and n = 128 callback cohorts.
3. Individual #3 in top and bottom table are the same individual, aged in the 40s during recruitment and in the 50s during callback. Both individual IDs marked with an “\*”.
4. Age in decades
5. Sex: M=male, F=female
6. Body Mass Index (BMI) measured in kg/m<sup>2</sup>

**Supplementary Table 8. Comparison of NOTCH3 p.Arg1231Cys Genotypes in Callback Participants<sup>1</sup>**

| Phenotype                         | Counts<br>(RR RA AA)                | Homozygote<br>RR     | Heterozygote<br>RA   | Homozygote<br>AA     |
|-----------------------------------|-------------------------------------|----------------------|----------------------|----------------------|
| Female                            | 75 50 3                             | 43 (57.3%)           | 25 (50%)             | 1 (33.3%)            |
| Age                               | 75 50 3                             | 46 (36 - 57)         | 50 (39 - 62)         | 49 (40 - 52)         |
| BMI (kg/m <sup>2</sup> )          | 74 44 3                             | 27.5 (23 - 32)       | 29 (26 - 35)         | 27 (25 - 31)         |
| Height (m)                        | 74 45 3                             | 158 (153 - 166)      | 161 (150 - 167)      | 161 (157 - 165)      |
| Weight (kg)                       | 74 44 3                             | 71 (58 - 79)         | 75.5 (64 - 90)       | 75 (69 - 78)         |
| WHR (Waist to Hip Ratio)          | 73 46 3                             | 0.91 (0.86 - 0.95)   | 0.91 (0.88 - 0.97)   | 0.96 (0.88 - 0.97)   |
| Systolic BP                       | 68 45 3                             | 127 (120 - 141.5)    | 128 (116 - 132)      | 145 (133 - 146.5)    |
| Diastolic BP                      | 68 45 3                             | 80.5 (78 - 90)       | 80 (80 - 87)         | 89 (83 - 91)         |
| Cholesterol (mg/dl)               | 73 49 3                             | 162.9 (133 - 185.9)  | 161.6 (129 - 190)    | 168.4 (160 - 179)    |
| TG (mg/dl)                        | 73 49 3                             | 156 (119 - 189)      | 194 (133 - 253)      | 168 (128 - 235)      |
| HDL (mg/dl)                       | 73 49 3                             | 37 (30 - 44)         | 31 (28 - 38)         | 32 (27.5 - 36.5)     |
| LDL (mg/dl)                       | 73 49 3                             | 90 (71 - 112)        | 84 (62 - 111)        | 103 (85 - 117)       |
| Fat Composition                   | 63 36 3                             | 28.7 (24.5 - 38.15)  | 35.35 (24.1 - 41.8)  | 23.7 (20.8 - 36.05)  |
| Impedance                         | 59 33 1                             | 544 (477.5 - 589)    | 519 (464 - 549)      | 443 (443 - 443)      |
| Fat Mass (kg)                     | 62 35 3                             | 9.3 (6.76 - 12.11)   | 11.02 (7.98-16.06)   | 8.03 (6.53 - 12.79)  |
| BMR (kJ)                          | 61 35 3                             | 6086 (5356 - 6759)   | 6185 (5751 - 7047)   | 5676 (5656 - 6298)   |
| FFM (kg)                          | 61 35 3                             | 21.2 (18.55 - 24.95) | 22.1 (19.32 -24.61)  | 23.1 (20.91 - 24.49) |
| Total Body Water (kg)             | 61 35 3                             | 15.5 (13.2 - 18.14)  | 16.2 (14.36 - 17.87) | 16.9 (14.36 - 17.19) |
| Creatinine (mg/dl)                | 73 49 3                             | 0.78 (0.61 - 0.94)   | 0.8 (0.65 - 1.03)    | 0.92 (0.68 - 0.92)   |
| eGFR (mL/min/1.73m <sup>2</sup> ) | 73 49 3                             | 98 (79 - 111)        | 89 (76 - 107)        | 87 (86 - 128)        |
| HbA1c (%)                         | 33 19 2                             | 5.8 (5.4 - 6.64)     | 5.89 (5.68 - 8.13)   | 5.95 (5.88 - 6.02)   |
| Glucose (mg/dl)                   | 73 49 3                             | 104.4 (81.5 - 123)   | 104.2 (88.5 - 129.6) | 107.7 (91.8 - 147.9) |
| AST (U/L)                         | 73 49 3                             | 21.8 (17.4 - 28)     | 21.6 (17.7 - 25.8)   | 24 (20.35 - 25.8)    |
| ALT (U/L)                         | 73 49 3                             | 19.1 (12.4 - 26.9)   | 18.2 (14.9 - 25.4)   | 27.7 (20.7 - 30.3)   |
| WBC (10 <sup>3</sup> /μl)         | 33 23 3                             | 5.66 (4.62 - 7.08)   | 6.88 (3.8 - 8.25)    | 3.8 (3.37 - 4.23)    |
| RBC (10 <sup>6</sup> /μl)         | 33 23 3                             | 4.87 (4.51 - 5.11)   | 4.8 (4.66 - 5.15)    | 4.76 (4.62 - 5.17)   |
| Hgb (g/dl)                        | 33 23 3                             | 13.1 (12.3 - 14.3)   | 13.3 (12.8 - 13.55)  | 13.2 (13.15 - 14.1)  |
| Hct (%)                           | 33 23 3                             | 41.8 (39.9 - 45.6)   | 42.2 (41.15 - 44)    | 43.9 (41.9 - 46.65)  |
| MCV (fL)                          | 33 23 3                             | 87.1 (82.5 - 92.7)   | 89.7 (83.95 - 91.4)  | 88.5 (86.2 - 93.3)   |
| MCH (pg)                          | 33 23 3                             | 27 (25.3 - 29)       | 27.1 (26.1 - 28.8)   | 27.5 (27.2 - 28.5)   |
| MCHC (g/dl)                       | 33 23 3                             | 30.8 (29.8 - 32)     | 31.3 (29.85 - 32)    | 30.4 (30.25 - 31.6)  |
| Plt (10 <sup>3</sup> /μl)         | 33 23 3                             | 275 (226 - 307)      | 217 (146 - 288)      | 248 (218 - 286)      |
| Neutrophils (%)                   | 33 23 3                             | 52 (41.4 - 57.1)     | 59.3 (25 - 65)       | 46.7 (42.7 - 53.3)   |
| Lymphocytes (%)                   | 33 23 3                             | 31.5 (28 - 42)       | 25.5 (21 - 37)       | 31.7 (27.8 - 37.8)   |
| Monocytes (%)                     | 33 23 3                             | 8.2 (6.1 - 9.9)      | 7 (5.15 - 9.75)      | 13.3 (9.35 - 14.15)  |
| Eosinophils (%)                   | 33 22 3                             | 3.6 (2.2 - 6.7)      | 2.05 (1.5 - 4.8)     | 2.4 (1.95 - 7.1)     |
| Basophils (%)                     | 33 21 3                             | 1.8 (1.3 - 3.9)      | 1.7 (1.2 - 6.3)      | 1.7 (1.6 - 2.15)     |
| <b>Binary Traits</b>              |                                     |                      |                      |                      |
| Angina                            | Cases: 2 5 0<br>Controls: 73 45 3   | 2 (2.7%)             | 5 (10%)              | 0                    |
| Diabetes                          | Cases: 19 16 1<br>Controls: 56 36 2 | 19 (25.3%)           | 16 (32%)             | 1 (33.3%)            |
| Hypertension                      | Cases: 20 28 3<br>Controls: 55 22 0 | 20 (26.7%)           | 28 (56%)             | 3 (100%)             |
| MI                                | Cases: 3 16 3<br>Controls: 72 34 0  | 3 (4%)               | 16 (32%)             | 0 (0%)               |
| MI age of Onset                   | Cases: 3 16 0                       | 63 (56 - 69)         | 52 (48 - 63)         | NA                   |
| Stroke                            | Cases: 1 1 0<br>Controls: 74 49 3   | 1 (1.3%)             | 1 (2%)               | 0                    |

<sup>1</sup>. Shown is a summary by genotype of the 128 callback participants, including 27 families of heterozygotes and 1 homozygotes family successfully contacted for a recall study and genotyped for Arg1231Cys. In total 2 additional homozygotes were identified, 50 heterozygous carriers and 75 non-carriers among the families. Baseline characteristics and self-reported medical history for all individuals is provided in the table. From left-to-right is the phenotype, the total genotype counts (RR =reference homozygote | RA = heterozygote | AA = alternate homozygote), and the median with interquartile range in parenthesis for RR, RA and AA genotypes. Quantitative traits on top and binary traits on the bottom. eGFR: estimated Glomerular Filtration Rate (Calculate from creatinine using MDRD equation, BMR: Base Metabolic Rate, FFM: Fat Free Mass, Hgb: Hemoglobin, Hct: Hematocrit, MCV: Mean Corpuscular Volume, MCH: , Mean Corpuscular Hemoglobin, MCHC: Mean Corpuscular Hemoglobin Concentration, Plt: Platelets, MI: Myocardial Infarction

**Supplementary Table 9. Comparison of *NOTCH3* p.Arg1231Cys Genotypes in PGR<sup>1</sup>**

| Phenotype                    | Genotype counts (RR RA AA)               | Homozygous RR         | Heterozygous RA        | Homozygous AA           | P val additive | P val Het RA vs Hom AA |
|------------------------------|------------------------------------------|-----------------------|------------------------|-------------------------|----------------|------------------------|
| Age                          | 74997 813 9                              | 54 (47, 60)           | 53 (47, 60)            | 50 (45, 66)             |                |                        |
| Stroke All                   | Cases: 4939 98 3 Controls: 25619 271 2   | 16%                   | 27%                    | 60%                     | 4.92E-08       | 0.28                   |
| Stroke Age                   | 4939 98 3                                | 60 (50, 67)           | 57 (49, 63)            | 70 (68, 75)             |                |                        |
| Myocardial infarction        | Cases: 26665 272 3 Controls: 33563 361 3 | 44%                   | 43%                    | 50%                     | 0.89           | 0.86                   |
| Myocardial Infarction Age    | 26665 272 3                              | 55 (46, 60)           | 52 (45, 60)            | 45 (42.5, 47.5)         |                |                        |
| Hypertension (Self-Reported) | Cases: 27304 294 3 Controls: 46954 508 5 | 37%                   | 37%                    | 38%                     | 0.58           | 0.46                   |
| Type 2 Diabetes              | Cases: 21322 221 2 Controls: 37824 410 6 | 36%                   | 35%                    | 25%                     | 0.67           | 0.68                   |
| Height (m)                   | 44680 503 5                              | 165 (159, 170)        | 165 (158, 170)         | 167 (160, 170)          | 0.75           | 0.82                   |
| Weight (kg)                  | 45066 507 5                              | 71 (65, 80)           | 70 (64, 80)            | 70 (69, 76)             | 0.055          | 0.82                   |
| BMI (kg/m <sup>2</sup> )     | 44125 497 5                              | 26.45 (23.88, 29.3)   | 26.22 (23.66, 29.38)   | 26.95 (22.6, 27.25)     | 0.125          | 0.97                   |
| Waist to Hip Ratio           | 43899 501 5                              | 0.96 (0.92, 0.99)     | 0.96 (0.92, 0.99)      | 1.025 (0.96, 1.04)      | 0.086          | 0.15                   |
| Systolic BP                  | 63462 692 6                              | 130 (120, 140)        | 130 (120, 140)         | 150 (127.5, 150)        | 0.78           | 0.068                  |
| Diastolic BP                 | 63992 703 6                              | 80 (76, 90)           | 80 (80, 90)            | 95 (86.25, 100)         | 0.19           | 0.016                  |
| Total Cholesterol (mg/dl)    | 70797 765 8                              | 174 (143.1, 207.9)    | 175.5 (142, 208)       | 219.5 (162, 227)        | 0.85           | 0.087                  |
| Triglycerides (mg/dl)        | 70617 759 8                              | 156.75 (109.6, 228.8) | 153.0 (109.95, 235.0)  | 190.75 (133.25, 264.65) | 0.72           | 0.74                   |
| LDL (mg/dl)                  | 68503 734 8                              | 103.5 (78.18, 131)    | 104.57 (77.38, 129.35) | 123.14 (104.9, 137.25)  | 0.59           | 0.16                   |
| HDL (mg/dl)                  | 70535 759 8                              | 34 (27.8, 41)         | 34 (28, 41)            | 31.9 (30.25, 35)        | 0.30           | 0.76                   |
| Creatinine (mg/dl)           | 53244 567 7                              | 0.9 (0.7, 1.08)       | 0.9 (0.7, 1.08)        | 0.9 (0.86, 1.05)        | 0.38           | 0.56                   |
| eGFR                         | 51084 541 7                              | 86.75 (69.83, 104.66) | 87.5 (71.45, 105.59)   | 93.5 (71.33, 94.51)     | 0.68           | 0.89                   |

<sup>1</sup>. Characteristics of non-carriers, heterozygotes and homozygotes of Arg1231Cys across 75,819 sequenced individuals in PGR. P-values were generated using whole genome regression as implemented in REGENIE adjusting for age, age<sup>2</sup>, age\*sex, sex and top 10 genetic PCs. Hypertension was self-reported. Type 2 Diabetes cases were defined as individuals self-reporting to have diabetes, or HbA1c > 6.5, or on oral hypoglycemic medication. eGFR was calculated using MDRD equation.

Supplementary Table 10. *NOTCH3* p.Arg1231Cys Frequency Across 1000 Genomes Phase 3 Populations<sup>1</sup>.

| Primary Ancestral Component | Population code | Population Description                                            | Variant         | A1 | A2 | AAF    | Allele count | Count A1 | Count A2 | Total People |
|-----------------------------|-----------------|-------------------------------------------------------------------|-----------------|----|----|--------|--------------|----------|----------|--------------|
| Africa                      | ACB             | African Caribbean in Barbados                                     | 19:15179052:G:A | A  | G  | 0      | 192          | 0        | 192      | 96           |
|                             | ASW             | African Ancestry in Southwest US                                  | 19:15179052:G:A | A  | G  | 0      | 122          | 0        | 122      | 61           |
|                             | ESN             | Esan in Nigeria                                                   | 19:15179052:G:A | A  | G  | 0      | 198          | 0        | 198      | 99           |
|                             | GWD             | Gambian in Western Division, The Gambia - Mandinka                | 19:15179052:G:A | A  | G  | 0      | 226          | 0        | 226      | 113          |
|                             | LWK             | Luhya in Webuye, Kenya                                            | 19:15179052:G:A | A  | G  | 0      | 198          | 0        | 198      | 99           |
|                             | MSL             | Mende in Sierra Leone                                             | 19:15179052:G:A | A  | G  | 0      | 170          | 0        | 170      | 85           |
|                             | YRI             | Yoruba in Ibadan, Nigeria                                         | 19:15179052:G:A | A  | G  | 0      | 216          | 0        | 216      | 108          |
| Americas                    | CLM             | Colombian in Medellin, Colombia                                   | 19:15179052:G:A | A  | G  | 0      | 188          | 0        | 188      | 94           |
|                             | MXL             | Mexican Ancestry in Los Angeles, California                       | 19:15179052:G:A | A  | G  | 0      | 128          | 0        | 128      | 64           |
|                             | PEL             | Peruvian in Lima, Peru                                            | 19:15179052:G:A | A  | G  | 0      | 170          | 0        | 170      | 85           |
|                             | PUR             | Puerto Rican in Puerto Rico                                       | 19:15179052:G:A | A  | G  | 0      | 208          | 0        | 208      | 104          |
| East Asia                   | CDX             | Chinese Dai in Xishuangbanna, China                               | 19:15179052:G:A | A  | G  | 0      | 186          | 0        | 186      | 93           |
|                             | CHB             | Han Chinese in Beijing, China                                     | 19:15179052:G:A | A  | G  | 0      | 206          | 0        | 206      | 103          |
|                             | CHS             | Han Chinese South                                                 | 19:15179052:G:A | A  | G  | 0      | 210          | 0        | 210      | 105          |
|                             | JPT             | Japanese in Tokyo, Japan                                          | 19:15179052:G:A | A  | G  | 0      | 208          | 0        | 208      | 104          |
|                             | KHV             | Kinh in Ho Chi Minh City, Vietnam                                 | 19:15179052:G:A | A  | G  | 0      | 198          | 0        | 198      | 99           |
| Europe                      | CEU             | Utah residents (CEPH) with Northern and Western European ancestry | 19:15179052:G:A | A  | G  | 0      | 198          | 0        | 198      | 99           |
|                             | FIN             | Finnish in Finland                                                | 19:15179052:G:A | A  | G  | 0      | 198          | 0        | 198      | 99           |
|                             | GBR             | British in England and Scotland                                   | 19:15179052:G:A | A  | G  | 0      | 182          | 0        | 182      | 91           |
|                             | IBS             | Iberian populations in Spain                                      | 19:15179052:G:A | A  | G  | 0      | 214          | 0        | 214      | 107          |
|                             | TSI             | Toscani in Italy                                                  | 19:15179052:G:A | A  | G  | 0      | 214          | 0        | 214      | 107          |
| South Asia                  | BEB             | Bengali in Bangladesh                                             | 19:15179052:G:A | A  | G  | 0      | 172          | 0        | 172      | 86           |
|                             | GIH             | Gujarati Indians in Houston, TX                                   | 19:15179052:G:A | A  | G  | 0.0049 | 206          | 1        | 205      | 103          |

|     |                             |                 |   |   |        |     |   |     |     |
|-----|-----------------------------|-----------------|---|---|--------|-----|---|-----|-----|
| ITU | Indian Telugu in the UK     | 19:15179052:G:A | A | G | 0.0049 | 204 | 1 | 203 | 102 |
| PJL | Punjabi in Lahore, Pakistan | 19:15179052:G:A | A | G | 0.0052 | 192 | 1 | 191 | 96  |
| STU | Sri Lankan Tamil in the UK  | 19:15179052:G:A | A | G | 0.0049 | 204 | 1 | 203 | 102 |

---

<sup>1</sup>. From left-to-right is the primary ancestral component of the population, the standard population code, description of the population, variant (chr:pos:ref:alt), alternate allele, reference allele, alternative allele frequency, allele count, alternate allele count, reference allele count.

**Supplementary Table 11. *NOTCH3* p.Arg1231Cys Frequency Across Pakistani Ethnic Groups<sup>1</sup>.**

| <b>Population</b> | <b>Name</b>     | <b>A1</b> | <b>A2</b> | <b>AAF</b> | <b>Allele count</b> | <b>Count A1</b> | <b>Count A2</b> | <b>Total Alleles</b> | <b>Total People</b> | <b>P</b> | <b>Q</b> | <b>P<sup>2</sup></b> | <b>2PQ</b> | <b>Q<sup>2</sup></b> | <b>n (Het)</b> | <b>n (Hom)</b> | <b>n (Total)</b> | <b>Prevalence (1 in ?)</b> |
|-------------------|-----------------|-----------|-----------|------------|---------------------|-----------------|-----------------|----------------------|---------------------|----------|----------|----------------------|------------|----------------------|----------------|----------------|------------------|----------------------------|
| Ansari            | 19:15179052:G:A | A         | G         | 5.60E-03   | 20,804              | 118             | 20,686          | 20,804               | 10,402              | 9.94E-01 | 5.60E-03 | 9.89E-01             | 1.11E-02   | 3.14E-05             | 116            | 0              | 116              | 90                         |
| Rajput/ Punjabi   | 19:15179052:G:A | A         | G         | 6.00E-03   | 41,814              | 252             | 41,562          | 41,814               | 20,907              | 9.94E-01 | 6.00E-03 | 9.88E-01             | 1.19E-02   | 3.60E-05             | 249            | 1              | 250              | 84                         |
| Balochi/ Pathan   | 19:15179052:G:A | A         | G         | 7.40E-03   | 6,136               | 46              | 6,090           | 6,136                | 3,068               | 9.93E-01 | 7.40E-03 | 9.85E-01             | 1.47E-02   | 5.48E-05             | 45             | 0              | 45               | 68                         |

<sup>1</sup>. To assess the prevalence of p.Arg1231Cys across ethnic groups, the first seven principal components (PCs) were quantified from Illumina GSA-V2 array data for a sample of PGR where self-reported ethnicity was available, and a UMAP plot [9] was produced from the data. Genetic data for the rest of the PGR cohort was projected into this space. Visual inspection of the plot identified three major ethnic groups, including Ansari (South Asian), Rajput/ Punjabi (South Asian), and Balochi/ Pathan (West Asian). Allele frequency within each ethnic group was calculated from exome sequence data. From left-to-right is the ethnicity, chromosome, variant (chr:pos:ref:alt), alternate allele, reference allele, alternate allele frequency, allele count, alternate allele count, reference allele count.

**Supplementary Table 12. Significant and Suggestive ExWAS Hits in PGR Discovery Cohort Across 5 Stroke Phenotypes<sup>1</sup>.**

| Category <sup>2</sup> | Variant          | Nearest Gene   | DbSNP rsID  | Phenotype                            | Odds ratio (95% CI)    | P value  | AAF      | Cases (RR RA AA) | Controls (RR RA AA) |
|-----------------------|------------------|----------------|-------------|--------------------------------------|------------------------|----------|----------|------------------|---------------------|
| Suggestive            | 3:33152905:A:C   | <i>SUSD5</i>   | rs768145924 | Ischemic stroke                      | 143.28 (20.11, 1020.7) | 7.20E-07 | 2.28E-04 | 2578 6 0         | 25885 7 0           |
| Suggestive            | 6:73615308:C:T   | <i>SLC17A5</i> | rs146729568 | Intracerebral hemorrhage             | 2.29 (1.65, 3.17)      | 7.29E-07 | 1.03E-02 | 1442 50 3        | 25393 489 9         |
| Suggestive            | 6:73615308:C:T   | <i>SLC17A5</i> | rs146729568 | Subcortical intracerebral hemorrhage | 2.35 (1.67, 3.3)       | 8.61E-07 | 1.03E-02 | 1306 48 2        | 25393 489 9         |
| Suggestive            | 11:114527797:G:A | <i>NXPE1</i>   | rs778206967 | Subcortical intracerebral hemorrhage | 23.47 (6.66, 82.65)    | 9.00E-07 | 4.61E-04 | 1346 8 0         | 25754 17 0          |
| Suggestive*           | 11:1884062:T:C   | <i>LSP1</i>    | rs661348    | Intracerebral hemorrhage             | 1.26 (1.16, 1.37)      | 8.01E-08 | 2.74E-01 | 711 610 173      | 13951 9824 2096     |
| Suggestive*           | 11:1884062:T:C   | <i>LSP1</i>    | rs661348    | Subcortical intracerebral hemorrhage | 1.27 (1.16, 1.38)      | 9.67E-08 | 2.73E-01 | 637 560 158      | 13951 9824 2096     |
| Significant           | 19:15179052:G:A  | <i>NOTCH3</i>  | rs201680145 | Subcortical intracerebral hemorrhage | 3.39 (2.26, 5.1)       | 3.87E-09 | 5.84E-03 | 1313 43 0        | 25619 271 2         |
| Significant           | 19:15179052:G:A  | <i>NOTCH3</i>  | rs201680145 | Intracerebral hemorrhage             | 3.17 (2.12, 4.73)      | 1.79E-08 | 5.82E-03 | 1451 44 0        | 25619 271 2         |
| Significant           | 19:15179052:G:A  | <i>NOTCH3</i>  | rs201680145 | Stroke                               | 2.19 (1.65, 2.9)       | 4.92E-08 | 6.13E-03 | 4939 98 3        | 25619 271 2         |

1. Shown are the genome-wide significant (p value < 5.0x10<sup>-8</sup>) and suggestive hits (p value < 1.0x10<sup>-6</sup> & > 5.0x10<sup>-8</sup>) for 5 stroke phenotype ExWAS in the PGR discovery cohort with at least 10 variant carriers. From left-to-right is the significance category (significant or suggestive), variant name (Chr:pos:ref:alt), nearest gene, dbSNP rsID, phenotype, effect size, odds ratio (95% confidence interval), p value, cases count (total | homozygous reference | heterozygous |homozygous alternate), controls count (total | homozygous reference | heterozygous |homozygous alternate). Hits are organized from top-to-bottom by genomic coordinates and effect size.
2. Known locus from recent major GWAS [10] denoted with “\*”
3. Stroke subphenotypes with <500 cases were not analyzed.



**Supplementary Table 13. Conditional Association Test of *LSP1* Locus Variant Associated with Stroke in PGR<sup>1</sup>.**

| Analysis <sup>2</sup> | Variant        | Nearest Gene | DbSNP rsID | Phenotype                            | Odds ratio (95% CI) | P value  | AAF      | Cases (RR RA AA) | Controls (RR RA AA) |
|-----------------------|----------------|--------------|------------|--------------------------------------|---------------------|----------|----------|------------------|---------------------|
| Initial               | 11:1884062:T:C | LSP1         | rs661348   | Intracerebral hemorrhage             | 1.26 (1.16, 1.37)   | 8.01E-08 | 2.74E-01 | 711 610 173      | 13951 9824 2096     |
| Initial               | 11:1884062:T:C | LSP1         | rs661348   | Subcortical intracerebral hemorrhage | 1.27 (1.16, 1.38)   | 9.67E-08 | 2.73E-01 | 711 610 173      | 13951 9824 2096     |
| Conditional           | 11:1884062:T:C | LSP1         | rs661348   | Intracerebral hemorrhage             | 1.23 (1.09, 1.39)   | 8.83E-04 | 2.74E-01 | 684 596 168      | 13139 9260 1988     |
| Conditional           | 11:1884062:T:C | LSP1         | rs661348   | Subcortical intracerebral hemorrhage | 1.22 (1.08, 1.39)   | 2.06E-03 | 2.74E-01 | 613 546 153      | 13139 9260 1988     |

- <sup>1</sup> Shown are the top hits ( $p < 1.0 \times 10^{-7}$ ) for 5 stroke Phenotype ExWAS in the PGR discovery cohort in addition to *NOTCH3* p.Arg1231Cys. From left-to-right is the stage in the analysis (initial or conditional), variant name (Chr:pos:ref:alt), nearest gene, dbSNP rsID, phenotype, effect size, odds ratio (95% confidence interval), p value, cases count (total | homozygous reference | heterozygous | homozygous alternate), controls count (total | homozygous reference | heterozygous | homozygous alternate).
- <sup>2</sup> Initial analysis revealed an association between LSP intronic variant rs661348, a locus where two other non-coding variants (rs1973765 and rs569550) were previously associated with stroke in a large multi-ethnic GWAS [10]. A conditional analysis was conducted, conditional on the two known variants.

**Supplementary Table 14. PheWAS of Binary Traits in PGR Discovery Cohort for *LSP1* rs661348<sup>1</sup>.**

| Phenotype                                                               | Odds ratio (95% CI) | P value  | AAF  | Cases (RR RA AA) | Controls (RR RA AA) |
|-------------------------------------------------------------------------|---------------------|----------|------|------------------|---------------------|
| Intracerebral hemorrhage diagnosis                                      | 1.3 (1.2, 1.4)      | 8.01E-08 | 0.27 | 711 610 173      | 13951 9824 2096     |
| Subcortical intracerebral hemorrhage                                    | 1.3 (1.2, 1.4)      | 9.67E-08 | 0.27 | 637 560 158      | 13951 9824 2096     |
| Stroke                                                                  | 1.1 (1, 1.2)        | 2.94E-04 | 0.27 | 2579 1990 467    | 13951 9824 2096     |
| Using combination drug treatment for high blood pressure / hypertension | 1.3 (1.1, 1.5)      | 1.50E-03 | 0.28 | 185 171 45       | 17763 12728 2795    |
| New pathological Q waves                                                | 1.2 (1.1, 1.4)      | 1.65E-03 | 0.28 | 295 254 64       | 9520 6743 1493      |
| Diabetes mellitus case vs control                                       | 0.94 (0.91, 0.98)   | 4.10E-03 | 0.28 | 4681 3409 648    | 14692 10487 2394    |
| Self-reported history of diabetes                                       | 0.95 (0.91, 0.98)   | 5.41E-03 | 0.28 | 4665 3401 648    | 14703 10490 2393    |
| Increase or irregular heartbeat                                         | 0.94 (0.9, 0.99)    | 1.01E-02 | 0.27 | 2951 2050 436    | 16331 11766 2585    |
| Self-reported hypertension                                              | 1 (1, 1.1)          | 2.61E-02 | 0.28 | 7924 5886 1308   | 11335 7937 1713     |
| Physical activity at work, light                                        | 0.94 (0.89, 1)      | 3.61E-02 | 0.27 | 2056 1434 271    | 17587 12641 2809    |
| Digoxin medication for heart failure                                    | 1.2 (1, 1.5)        | 3.64E-02 | 0.28 | 93 108 17        | 17851 12789 2822    |

1. Shown are ExWAS summary statistics for available phenotypes with p values < 0.05 in the PGR discovery cohort. From left to right is the phenotype, odds ratio (95% confidence interval in parenthesis), p value, allele frequency, cases genotype counts (Ref homozygote | heterozygote | Alt homozygote), controls genotype counts (Ref homozygote | heterozygote | Alt homozygote).
2. Three analyses were conducted, with the main difference being how the controls were defined. For more detail see Supplementary Text for details.

**Supplementary Table 15. PheWAS of Quantitative Traits in PGR Discovery Cohort for *LSPI* rs661348<sup>1</sup>.**

| Phenotype                                | Beta (95% CI)            | P value  | AAF  | Cases (RR RA AA) | Units   |
|------------------------------------------|--------------------------|----------|------|------------------|---------|
| Age at diagnosis of angina               | 0.12 (0.021, 0.21)       | 1.68E-02 | 0.27 | 479 336 71       | Years   |
| Oral hypoglycemics I duration            | -0.13 (-0.24, -0.021)    | 1.96E-02 | 0.25 | 309 203 38       | Years   |
| Low-density lipoprotein (LDL) calculated | -0.017 (-0.034, -0.0014) | 3.35E-02 | 0.27 | 18241 13021 2856 | mmHg    |
| Aspirin medication duration              | -0.071 (-0.14, -0.0045)  | 3.65E-02 | 0.28 | 842 640 139      | Years   |
| Waist hip ratio                          | 0.017 (0.00082, 0.034)   | 3.96E-02 | 0.27 | 17301 12358 2671 | Decimal |

<sup>1</sup>. Shown are ExWAS summary statistics for available phenotypes with p values < 0.05 in the PGR discovery cohort. From left to right is the phenotype, effect size (95% confidence interval in parenthesis), p value, allele frequency, cases genotype counts (Ref homozygote | heterozygote | Alt homozygote ), and units.

**Supplementary Table 16. Top PheWAS Binary Trait Hits in UKB Replication Cohort for *LSP1* rs661348<sup>1</sup>.**

| <b>Phenotype</b>                                                   | <b>Odds Ratio<br/>(95% CI)</b> | <b>P value</b> | <b>AAF</b> | <b>Cases<br/>(RR RA AA)</b> | <b>Controls<br/>(RR RA AA)</b> |
|--------------------------------------------------------------------|--------------------------------|----------------|------------|-----------------------------|--------------------------------|
| Hypertension, self-reported - any visit                            | 1.1 (1, 1.1)                   | 8.05E-25       | 0.4        | 37969 56217 21192           | 74251 104598 37317             |
| RGC BP med                                                         | 1.1 (1, 1.1)                   | 1.45E-24       | 0.4        | 32816 48543 18397           | 75843 106627 38331             |
| I10: Essential (primary) hypertension                              | 1.1 (1, 1.1)                   | 2.08E-23       | 0.4        | 34666 51130 19254           | 92277 130085 46561             |
| Hypertension, ICD10: I10 or self-reported - any visit              | 1.1 (1, 1.1)                   | 7.40E-18       | 0.4        | 33020 48785 18340           | 78279 110745 39672             |
| Bendroflumethiazide - any visit                                    | 1.1 (1.1, 1.1)                 | 8.92E-16       | 0.4        | 7761 12180 4624             | 100898 142990 52104            |
| Amlodipine - any visit                                             | 1.1 (1.1, 1.1)                 | 2.90E-15       | 0.4        | 6281 9592 3809              | 102378 145578 52919            |
| Medication for cholesterol, blood pressure or diabetes - any visit | 1.1 (1.1, 1.1)                 | 3.23E-13       | 0.4        | 17058 24841 9501            | 6371 8741 2917                 |

<sup>1</sup>. To investigate the potential association between *LSP1* and stroke, a PheWAS analysis was conducted across UKB phenotypes for the associated variant rs661348. Shown are phenotypes with genome-wide significant p values, from left-to-right is the phenotype, odds ratio (95% confidence interval), p value, alternate allele frequency (AAF), case counts by genotype (Ref homozygote | heterozygote | Alt homozygote), and the control counts by genotype (Ref homozygote | heterozygote | Alt homozygote).

**Supplementary Table 17. Top PheWAS Quantitative Trait Hits in UKB Replication Cohort for *LSP1* rs661348<sup>1</sup>.**

| <b>Phenotype</b>                                                 | <b>Beta (95% CI)</b> | <b>Pval</b> | <b>AAF</b> | <b>Cases (RR RA AA)</b> | <b>Units</b> |
|------------------------------------------------------------------|----------------------|-------------|------------|-------------------------|--------------|
| Systolic blood pressure automated reading - initial visit - mean | 0.021 (0.017, 0.025) | 6.91E-25    | 0.4        | 137851 196508 71709     | mmHg         |
| Systolic blood pressure automated reading - mean of all visits   | 0.021 (0.017, 0.025) | 6.94E-25    | 0.4        | 138486 197438 72035     | mmHg         |

<sup>1</sup>. To investigate the potential association between *LSP1* and stroke, a PheWAS analysis was conducted across UKB phenotypes for the associated variant rs661348. Shown are phenotypes with genome-wide significant p values, from left-to-right is the phenotype, effect size (95% confidence interval), p value, alternate allele frequency (AAF), case counts by genotype (Ref homozygote | heterozygote | Alt homozygote), and the units.

**Supplemental Table 18. Comparison of *NOTCH3* p.Arg1231Cys Allele Frequency Across Ancestries in UKB<sup>1</sup>.**

| Ancestry                     | Field  | Value    |
|------------------------------|--------|----------|
| Total                        | AAF    | 0.00028  |
|                              | HET RA | 255      |
|                              | HOM AA | 0        |
|                              | N      | 454,787  |
| African / African American   | AAF    | 0        |
|                              | HET RA | 0        |
|                              | HOM AA | 0        |
|                              | N      | 9,093    |
| Admixed American             | AAF    | 0.000548 |
|                              | HET RA | 1        |
|                              | HOM AA | 0        |
|                              | N      | 912      |
| European / European American | AAF    | 0.000191 |
|                              | HET RA | 165      |
|                              | HOM AA | 0        |
|                              | N      | 431,384  |
| East Asian                   | AAF    | 0        |
|                              | HET RA | 0        |
|                              | HOM AA | 0        |
|                              | N      | 2254     |
| South Asian                  | AAF    | 0.004377 |
|                              | HET RA | 87       |
|                              | HOM AA | 0        |
|                              | N      | 9,939    |

<sup>1</sup>. Shown are the genotype counts and allele frequencies across ancestries in UKB. From left-to-right is the ancestry, field (top-to-bottom: alternate allele frequency, heterozygote genotype count, homozygote genotype count, total genotype count), and the value.

**Supplementary Table 19. PheWAS of Binary Trait Associations with p.Arg1231Cys in 450 K UKB European Participants<sup>1</sup>.**

| Phenotype                                                                                                                                                                    | P value        | Odds ratio (CI)     | AAF            | Cases<br>RR RA AA | Controls<br>RR RA AA |
|------------------------------------------------------------------------------------------------------------------------------------------------------------------------------|----------------|---------------------|----------------|-------------------|----------------------|
| Coffee type - any visit - Instant coffee AnyInst                                                                                                                             | 6.1E-06        | 2.4 (1.6, 3.5)      | 1.9E-04        | 192971 97 0       | 148099 32 0          |
| Satisfaction with bowel habits - any visit - 10 Very unhappy AnyInst                                                                                                         | 3.4E-05        | 6.2 (2.6, 15)       | 1.8E-04        | 4977 9 0          | 149254 48 0          |
| Average total household income before tax - any visit - Less than 18 000 AnyInst                                                                                             | 3.9E-05        | 2.1 (1.5, 3.1)      | 2.0E-04        | 85728 56 0        | 286961 91 0          |
| Qualifications - any visit - College or University degree AnyInst                                                                                                            | 7.6E-05        | 0.46 (0.31, 0.67)   | 1.9E-04        | 140274 33 0       | 213035 99 0          |
| Coffee type - any visit - Ground coffee include espresso filter etc AnyInst                                                                                                  | 9.4E-05        | 0.39 (0.24, 0.63)   | 1.9E-04        | 84032 16 0        | 257038 113 0         |
| Frequency of drinking alcohol - any visit - Monthly or less AnyInst                                                                                                          | 2.9E-04        | 3.3 (1.7, 6.3)      | 1.9E-04        | 17953 16 0        | 121426 36 0          |
| Mixed vegetable intake - any visit - half AnyInst                                                                                                                            | 3.3E-04        | 6.9 (2.4, 20)       | 2.4E-04        | 4751 8 0          | 24753 6 0            |
| <b>RGC_CVD_Ischemic_Composite_noAfib_CC<sup>2</sup></b>                                                                                                                      | <b>4.1E-04</b> | <b>4 (1.9, 8.6)</b> | <b>2.0E-04</b> | <b>6873 10 0</b>  | <b>353143 134 0</b>  |
| I67: Other cerebrovascular diseases                                                                                                                                          | 4.2E-04        | 5.3 (2.1, 14)       | 2.0E-04        | 3810 7 0          | 382830 148 0         |
| Illnesses of mother - any visit - 27 None of the above group 2 AnyInst                                                                                                       | 4.3E-04        | 0.57 (0.41, 0.78)   | 2.0E-04        | 308171 103 0      | 115021 67 0          |
| O47: False labor                                                                                                                                                             | 4.4E-04        | 18 (3.6, 86)        | 1.9E-04        | 1128 3 0          | 210633 77 0          |
| OPCS Z586                                                                                                                                                                    | 4.7E-04        | 15 (3.3, 70)        | 2.0E-04        | 681 3 0           | 350984 141 0         |
| Y83.4: Other reconstructive surgery as the cause of abnormal reaction of the patient, or of later complication, without mention of misadventure at the time of the procedure | 5.2E-04        | 9.5 (2.7, 34)       | 2.0E-04        | 1102 4 0          | 386383 151 0         |
| Illnesses of mother - any visit - Parkinsons disease AnyInst                                                                                                                 | 5.4E-04        | 4.1 (1.8, 9.1)      | 2.0E-04        | 6610 9 0          | 416582 161 0         |
| Illnesses of siblings - any visit - Stroke AnyInst                                                                                                                           | 6.3E-04        | 3 (1.6, 5.7)        | 2.0E-04        | 12230 14 0        | 359062 138 0         |
| OPCS4 Y39.5: Tattooing of organ NOC                                                                                                                                          | 6.3E-04        | 7.1 (2.3, 22)       | 2.0E-04        | 1790 5 0          | 349875 139 0         |
| Ever taken oral contraceptive pill - any visit - Yes AnyInst                                                                                                                 | 7.1E-04        | 0.41 (0.25, 0.69)   | 1.9E-04        | 191340 60 0       | 41534 27 0           |
| RGC_CVD_Ischemic_Composite_CC                                                                                                                                                | 8.8E-04        | 3.4 (1.6, 6.9)      | 2.0E-04        | 9124 11 0         | 370986 139 0         |
| Ever taken oral contraceptive pill - any visit - No AnyInst                                                                                                                  | 1.1E-03        | 2.3 (1.4, 3.9)      | 1.9E-04        | 42344 27 0        | 190530 60 0          |
| Worked with materials containing asbestos - any visit - 131 Sometimes AnyInst                                                                                                | 1.1E-03        | 4.1 (1.8, 9.7)      | 2.0E-04        | 9782 11 0         | 81098 25 0           |
| Never eat eggs dairy wheat sugar - any visit - Sugar or foods drinks containing sugar AnyInst                                                                                | 1.6E-03        | 0.49 (0.32, 0.77)   | 2.0E-04        | 86431 19 0        | 342735 152 0         |
| Frequency of drinking alcohol - any visit - 2 to 3 times a week AnyInst                                                                                                      | 1.8E-03        | 0.32 (0.15, 0.65)   | 1.9E-04        | 41933 6 0         | 97446 46 0           |
| White wine intake - any visit - 6 AnyInst                                                                                                                                    | 2.1E-03        | 19 (2.9, 130)       | 1.8E-04        | 517 2 0           | 43564 14 0           |
| O47.1: False labor at or after 37 completed weeks of gestation                                                                                                               | 2.5E-03        | 19 (2.8, 130)       | 1.9E-04        | 698 2 0           | 228188 84 0          |
| Z88.0: Allergy status to penicillin                                                                                                                                          | 2.6E-03        | 0.17 (0.053, 0.54)  | 2.0E-04        | 20214 1 0         | 365382 154 0         |

| <b>Phenotype</b>                                                                                                    | <b>P value</b> | <b>Odds ratio (CI)</b> | <b>AAF</b> | <b>Cases<br/>RR RA AA</b> | <b>Controls<br/>RR RA AA</b> |
|---------------------------------------------------------------------------------------------------------------------|----------------|------------------------|------------|---------------------------|------------------------------|
| Red wine intake - any visit - 3 AnyInst                                                                             | 3.0E-03        | 4.1 (1.6, 10)          | 1.9E-04    | 9370 9 0                  | 45414 12 0                   |
| Bipolar and major depression status - any visit - Probable Recurrent major depression moderate AnyInst <sup>2</sup> | 3.1E-03        | 3.2 (1.5, 6.8)         | 1.8E-04    | 13097 12 0                | 90619 26 0                   |
| Work hours lumped category - any visit - 3040 30 to 40 hours AnyInst                                                | 3.1E-03        | 0.37 (0.19, 0.71)      | 2.0E-04    | 61493 16 0                | 27105 20 0                   |
| Bread roll intake - any visit - 2 AnyInst                                                                           | 3.3E-03        | 3.4 (1.5, 7.5)         | 2.5E-04    | 13845 13 0                | 35956 12 0                   |
| E28: Ovarian dysfunction                                                                                            | 3.5E-03        | 15 (2.4, 89)           | 1.8E-04    | 497 2 0                   | 210330 76 0                  |
| K63.3: Ulcer of intestine                                                                                           | 3.5E-03        | 8.3 (2, 34)            | 2.0E-04    | 926 3 0                   | 386534 152 0                 |
| Cereal type - any visit - Muesli AnyInst                                                                            | 3.6E-03        | 0.5 (0.31, 0.8)        | 1.9E-04    | 77762 17 0                | 281457 122 0                 |
| Satsuma intake - any visit - 2 AnyInst                                                                              | 3.7E-03        | 7.1 (1.9, 27)          | 1.0E-04    | 14478 7 0                 | 29319 2 0                    |
| Grapefruit juice intake - any visit - half AnyInst                                                                  | 4.2E-03        | 0.04 (0.0044, 0.36)    | 3.0E-04    | 3779 0 0                  | 4549 5 0                     |
| H02.1: Ectropion of eyelid                                                                                          | 4.3E-03        | 13 (2.2, 76)           | 2.0E-04    | 579 2 0                   | 386906 153 0                 |
| Illnesses of mother - any visit - Severe depression AnyInst                                                         | 4.5E-03        | 2.1 (1.3, 3.5)         | 2.0E-04    | 26924 20 0                | 396268 150 0                 |
| L03: Cellulitis and acute lymphangitis                                                                              | 4.6E-03        | 2.6 (1.3, 5)           | 2.0E-04    | 12954 12 0                | 360629 137 0                 |
| Z88: Allergy status to drugs, medicaments and biological substances                                                 | 4.8E-03        | 0.35 (0.17, 0.73)      | 2.0E-04    | 36306 5 0                 | 339034 146 0                 |
| FI3 word interpolation - any visit - Grow AnyInst                                                                   | 5.0E-03        | 2.4 (1.3, 4.3)         | 2.1E-04    | 18366 17 0                | 152749 55 0                  |
| Direct bilirubin aliquot - any visit - 4 AnyInst                                                                    | 5.3E-03        | 12 (2.1, 70)           | 2.0E-04    | 533 2 0                   | 413906 164 0                 |
| Month of attending assessment centre - any visit - April AnyInst                                                    | 5.4E-03        | 0.41 (0.21, 0.77)      | 2.0E-04    | 42560 7 0                 | 387939 165 0                 |
| Z34.9: Encounter for supervision of normal pregnancy, unspecified                                                   | 5.4E-03        | 13 (2.1, 81)           | 1.9E-04    | 808 2 0                   | 210591 78 0                  |
| Alcohol intake frequency - any visit - Special occasions only AnyInst                                               | 5.4E-03        | 1.8 (1.2, 2.7)         | 2.0E-04    | 49429 33 0                | 380488 139 0                 |
| OPCS4 W15.7: Osteotomy of bone of foot and fixation HFQ                                                             | 5.9E-03        | 7.2 (1.8, 29)          | 2.0E-04    | 1048 3 0                  | 350617 141 0                 |
| Volume level set by participant right - any visit - 100 max AnyInst                                                 | 6.0E-03        | 2.8 (1.3, 6)           | 2.1E-04    | 8693 10 0                 | 164367 63 0                  |
| evening primrose oil product - any visit                                                                            | 6.1E-03        | 7.1 (1.8, 29)          | 2.0E-04    | 988 3 0                   | 319398 128 0                 |
| FI3 word interpolation - any visit - Adult AnyInst                                                                  | 6.1E-03        | 0.46 (0.26, 0.8)       | 2.1E-04    | 146971 52 0               | 24144 20 0                   |
| B37.0: Candidal stomatitis                                                                                          | 6.6E-03        | 6.8 (1.7, 27)          | 2.0E-04    | 1307 3 0                  | 386178 152 0                 |
| Alkaline phosphatase aliquot - any visit - 4 AnyInst                                                                | 6.8E-03        | 11 (1.9, 62)           | 2.0E-04    | 581 2 0                   | 414252 164 0                 |
| OPCS4 M76.4: Endoscopic dilation of urethra                                                                         | 6.8E-03        | 5.2 (1.6, 17)          | 2.0E-04    | 2127 4 0                  | 349538 140 0                 |
| OPCS4 W83.8: Other specified therapeutic endoscopic operations on other articular cartilage                         | 6.9E-03        | 11 (1.9, 61)           | 2.0E-04    | 611 2 0                   | 351054 142 0                 |
| 3mm asymmetry index irregular astigmatism level R - any visit - doubtful AnyInst                                    | 7.0E-03        | 5.3 (1.6, 18)          | 2.1E-04    | 2427 4 0                  | 99023 38 0                   |



| <b>Phenotype</b>                                                                                                    | <b>P value</b> | <b>Odds ratio (CI)</b> | <b>AAF</b> | <b>Cases<br/>RR RA AA</b> | <b>Controls<br/>RR RA AA</b> |
|---------------------------------------------------------------------------------------------------------------------|----------------|------------------------|------------|---------------------------|------------------------------|
| Non oily fish intake - any visit - Less than once a week AnyInst                                                    | 7.2E-03        | 1.5 (1.1, 2.1)         | 2.0E-04    | 131016 69 0               | 297606 101 0                 |
| R59.0: Localized enlarged lymph nodes                                                                               | 7.4E-03        | 5 (1.5, 16)            | 2.0E-04    | 2462 4 0                  | 383593 151 0                 |
| I63.9: Cerebral infarction, unspecified                                                                             | 7.6E-03        | 4.2 (1.5, 12)          | 2.0E-04    | 3379 5 0                  | 383680 150 0                 |
| gabapentin - any visit                                                                                              | 7.7E-03        | 5 (1.5, 16)            | 2.0E-04    | 2235 4 0                  | 318151 127 0                 |
| UK Biobank assessment centre - any visit - Newcastle AnyInst                                                        | 7.8E-03        | 2.2 (1.2, 4.1)         | 2.0E-04    | 33212 27 0                | 397287 145 0                 |
| Unspecified place                                                                                                   | 7.8E-03        | 4.1 (1.5, 12)          | 2.0E-04    | 3884 5 0                  | 383601 150 0                 |
| Cholesterol aliquot - any visit - 4 AnyInst                                                                         | 7.8E-03        | 10 (1.8, 58)           | 2.0E-04    | 601 2 0                   | 414213 164 0                 |
| Albumin aliquot - any visit - 4 AnyInst                                                                             | 7.9E-03        | 10 (1.8, 58)           | 2.0E-04    | 600 2 0                   | 414195 164 0                 |
| Urate aliquot - any visit - 4 AnyInst                                                                               | 8.0E-03        | 10 (1.8, 57)           | 2.0E-04    | 598 2 0                   | 413822 164 0                 |
| Vitamin D aliquot - any visit - 4 AnyInst                                                                           | 8.1E-03        | 10 (1.8, 57)           | 2.0E-04    | 599 2 0                   | 414036 164 0                 |
| Someone to take to doctor when needed as a child - any visit - Very often true AnyInst                              | 8.2E-03        | 0.43 (0.23, 0.8)       | 1.9E-04    | 116508 36 0               | 22120 16 0                   |
| Rheumatoid factor reportability - any visit - Reportable at assay and after aliquot correction if attempted AnyInst | 8.2E-03        | 1.9 (1.2, 2.9)         | 2.0E-04    | 36920 25 0                | 374621 137 0                 |
| Glucose aliquot - any visit - 4 AnyInst                                                                             | 8.2E-03        | 10 (1.8, 56)           | 2.0E-04    | 602 2 0                   | 413613 163 0                 |
| IGF 1 aliquot - any visit - 4 AnyInst                                                                               | 8.2E-03        | 10 (1.8, 57)           | 2.0E-04    | 603 2 0                   | 412008 162 0                 |
| Alanine aminotransferase aliquot - any visit - 4 AnyInst                                                            | 8.2E-03        | 10 (1.8, 56)           | 2.0E-04    | 603 2 0                   | 414285 164 0                 |
| Cystatin C aliquot - any visit - 4 AnyInst                                                                          | 8.2E-03        | 10 (1.8, 56)           | 2.0E-04    | 603 2 0                   | 414131 164 0                 |
| Apolipoprotein B aliquot - any visit - 4 AnyInst                                                                    | 8.2E-03        | 10 (1.8, 56)           | 2.0E-04    | 602 2 0                   | 414058 164 0                 |
| Aspartate aminotransferase aliquot - any visit - 4 AnyInst                                                          | 8.2E-03        | 10 (1.8, 56)           | 2.0E-04    | 603 2 0                   | 414266 164 0                 |
| Gamma glutamyltransferase aliquot - any visit - 4 AnyInst                                                           | 8.2E-03        | 10 (1.8, 56)           | 2.0E-04    | 603 2 0                   | 414119 164 0                 |
| HDL cholesterol aliquot - any visit - 4 AnyInst                                                                     | 8.2E-03        | 10 (1.8, 56)           | 2.0E-04    | 603 2 0                   | 414068 164 0                 |
| Calcium aliquot - any visit - 4 AnyInst                                                                             | 8.2E-03        | 10 (1.8, 56)           | 2.0E-04    | 603 2 0                   | 413827 164 0                 |
| Rubella german measles, ICD10: B06 or Self-reported - any visit                                                     | 8.3E-03        | 4.9 (1.5, 16)          | 2.1E-04    | 1956 4 0                  | 326710 133 0                 |
| C reactive protein aliquot - any visit - 4 AnyInst                                                                  | 8.3E-03        | 10 (1.8, 56)           | 2.0E-04    | 602 2 0                   | 413866 164 0                 |
| LDL direct aliquot - any visit - 4 AnyInst                                                                          | 8.3E-03        | 10 (1.8, 56)           | 2.0E-04    | 603 2 0                   | 413576 164 0                 |
| Rheumatoid factor aliquot - any visit - 4 AnyInst                                                                   | 8.3E-03        | 10 (1.8, 56)           | 2.0E-04    | 602 2 0                   | 413525 162 0                 |
| Phosphate aliquot - any visit - 4 AnyInst                                                                           | 8.3E-03        | 10 (1.8, 56)           | 2.0E-04    | 603 2 0                   | 413412 164 0                 |
| Apolipoprotein A aliquot - any visit - 4 AnyInst                                                                    | 8.3E-03        | 10 (1.8, 56)           | 2.0E-04    | 603 2 0                   | 413613 164 0                 |

| Phenotype                                                                             | P value | Odds ratio (CI)    | AAF     | Cases        |          | Controls     |          |
|---------------------------------------------------------------------------------------|---------|--------------------|---------|--------------|----------|--------------|----------|
|                                                                                       |         |                    |         | RR RA AA     | RR RA AA | RR RA AA     | RR RA AA |
| Lipoprotein A aliquot - any visit - 4 AnyInst                                         | 8.3E-03 | 10 (1.8, 56)       | 2.0E-04 | 601 2 0      |          | 401676 159 0 |          |
| Triglycerides aliquot - any visit - 4 AnyInst                                         | 8.5E-03 | 10 (1.8, 56)       | 2.0E-04 | 593 2 0      |          | 413974 164 0 |          |
| Creatinine aliquot - any visit - 4 AnyInst                                            | 8.6E-03 | 10 (1.8, 55)       | 2.0E-04 | 601 2 0      |          | 414001 164 0 |          |
| Total bilirubin aliquot - any visit - 4 AnyInst                                       | 8.6E-03 | 10 (1.8, 55)       | 2.0E-04 | 602 2 0      |          | 413955 164 0 |          |
| Urea aliquot - any visit - 4 AnyInst                                                  | 8.6E-03 | 10 (1.8, 55)       | 2.0E-04 | 602 2 0      |          | 413990 164 0 |          |
| Detention categories - any visit - Informal not formally detained AnyInst             | 8.8E-03 | 0.13 (0.029, 0.6)  | 1.9E-04 | 34076 11 0   |          | 2285 3 0     |          |
| N90.7: Vulvar cyst                                                                    | 9.0E-03 | 10 (1.8, 57)       | 1.9E-04 | 570 2 0      |          | 228316 84 0  |          |
| Willing to attempt cognitive tests - any visit - Begin games AnyInst                  | 9.9E-03 | 0.32 (0.13, 0.76)  | 2.0E-04 | 424502 165 0 |          | 5738 7 0     |          |
| Someone to take to doctor when needed as a child - any visit - Sometimes true AnyInst | 1.0E-02 | 4.1 (1.4, 12)      | 1.9E-04 | 3655 5 0     |          | 134973 47 0  |          |
| Intake of sugar added to coffee - any visit - half AnyInst                            | 1.0E-02 | 0.17 (0.045, 0.66) | 2.7E-04 | 10906 1 0    |          | 20643 16 0   |          |
| R93.3: Abnormal findings on diagnostic imaging of other parts of digestive tract      | 1.1E-02 | 4.6 (1.4, 15)      | 2.0E-04 | 2206 4 0     |          | 382708 150 0 |          |
| Death report format - any visit - IC Death Format 2012 onwards AnyInst                | 1.1E-02 | 0.12 (0.023, 0.61) | 2.0E-04 | 13517 2 0    |          | 4018 5 0     |          |
| K61.0: Anal abscess                                                                   | 1.1E-02 | 5.9 (1.5, 23)      | 2.0E-04 | 1289 3 0     |          | 386192 152 0 |          |
| RGC_T2D_Nephropathy_Loose_CC                                                          | 1.1E-02 | 11 (1.8, 72)       | 1.2E-04 | 2064 2 0     |          | 23526 4 0    |          |
| L29.0: Pruritus ani                                                                   | 1.1E-02 | 5.8 (1.5, 23)      | 2.0E-04 | 1389 3 0     |          | 383387 151 0 |          |
| Bipolar and major depression status - any visit - No Bipolar or Depression AnyInst    | 1.1E-02 | 0.43 (0.22, 0.82)  | 1.8E-04 | 74794 19 0   |          | 28922 19 0   |          |
| M16.1: Unilateral primary osteoarthritis of hip                                       | 1.1E-02 | 3.9 (1.4, 11)      | 2.0E-04 | 3950 5 0     |          | 383535 150 0 |          |
| Duration of heavy DIY - any visit - Between 15 and 30 minutes AnyInst                 | 1.1E-02 | 2 (1.2, 3.4)       | 1.9E-04 | 33565 21 0   |          | 145055 47 0  |          |
| M79.2: Neuralgia and neuritis, unspecified                                            | 1.2E-02 | 8.8 (1.6, 48)      | 2.0E-04 | 583 2 0      |          | 386529 153 0 |          |
| Sexually molested as a child - any visit - Often AnyInst                              | 1.2E-02 | 9 (1.6, 50)        | 1.9E-04 | 671 2 0      |          | 137322 50 0  |          |
| Z03.4: Observation for suspected myocardial infarction                                | 1.2E-02 | 4.4 (1.4, 14)      | 2.0E-04 | 2719 4 0     |          | 384766 151 0 |          |
| OPCS4 H55.3: Laying open of anal fistula NEC                                          | 1.3E-02 | 8.5 (1.6, 46)      | 2.0E-04 | 670 2 0      |          | 350995 142 0 |          |
| Number of vehicles in household - any visit - None AnyInst                            | 1.3E-02 | 1.8 (1.1, 2.9)     | 2.0E-04 | 35285 24 0   |          | 392302 148 0 |          |
| General happiness with own health - any visit - Extremely unhappy AnyInst             | 1.3E-02 | 5.7 (1.4, 23)      | 1.9E-04 | 1672 3 0     |          | 137526 49 0  |          |
| Plum intake - any visit - 2 AnyInst                                                   | 1.3E-02 | 0.088 (0.013, 0.6) | 3.4E-04 | 5311 0 0     |          | 12542 12 0   |          |
| O70.0: First degree perineal laceration during delivery                               | 1.3E-02 | 6.3 (1.5, 27)      | 1.9E-04 | 2360 3 0     |          | 209402 77 0  |          |
| First weekday of wear - any visit - Tuesday AnyInst                                   | 1.3E-02 | 5.8 (1.4, 24)      | 1.9E-04 | 1605 3 0     |          | 90054 31 0   |          |

| Phenotype                                                                                                 | P value | Odds ratio (CI)    | AAF     | Cases       | Controls     |
|-----------------------------------------------------------------------------------------------------------|---------|--------------------|---------|-------------|--------------|
|                                                                                                           |         |                    |         | RR RA AA    | RR RA AA     |
| Ever smoked - any visit - No AnyInst                                                                      | 1.3E-02 | 1.5 (1.1, 2)       | 2.0E-04 | 170817 84 0 | 257988 87 0  |
| Rubella german measles, Self-reported - any visit                                                         | 1.3E-02 | 4.3 (1.4, 14)      | 2.1E-04 | 2243 4 0    | 329123 134 0 |
| Pizza intake - any visit - 1 AnyInst                                                                      | 1.3E-02 | 8.6 (1.6, 48)      | 1.9E-04 | 3292 3 0    | 9842 2 0     |
| OPCS4 S15.1: Biopsy of lesion of skin of head or neck NEC                                                 | 1.4E-02 | 8.3 (1.5, 44)      | 2.0E-04 | 804 2 0     | 350861 142 0 |
| FI7 synonym - any visit - Rest AnyInst                                                                    | 1.4E-02 | 5.7 (1.4, 23)      | 2.1E-04 | 1458 3 0    | 125363 51 0  |
| Which eyes affected astigmatism - any visit - R eye AnyInst                                               | 1.4E-02 | 12 (1.6, 82)       | 1.4E-04 | 2587 3 0    | 15036 2 0    |
| hydrocortisone - any visit                                                                                | 1.4E-02 | 8.1 (1.5, 43)      | 2.0E-04 | 839 2 0     | 319547 129 0 |
| OPCS4 S36.1: Full thickness autograft of skin to head or neck                                             | 1.4E-02 | 5.4 (1.4, 21)      | 2.0E-04 | 1673 3 0    | 349992 141 0 |
| M47.9: Spondylosis, unspecified                                                                           | 1.4E-02 | 8 (1.5, 43)        | 2.0E-04 | 891 2 0     | 386594 153 0 |
| I67.9: Cerebrovascular disease, unspecified                                                               | 1.5E-02 | 5.4 (1.4, 21)      | 2.0E-04 | 1466 3 0    | 386017 152 0 |
| Willing to attempt cognitive tests - any visit - I am unable to try this AnyInst                          | 1.5E-02 | 2.9 (1.2, 6.9)     | 2.0E-04 | 6204 7 0    | 424036 165 0 |
| L73.9: Follicular disorder, unspecified                                                                   | 1.5E-02 | 7.9 (1.5, 42)      | 2.0E-04 | 678 2 0     | 384535 151 0 |
| Intake of sugar added to coffee - any visit - 1 AnyInst                                                   | 1.5E-02 | 3.7 (1.3, 10)      | 2.7E-04 | 16909 14 0  | 14640 3 0    |
| Z86.7: Personal history of diseases of the circulatory system                                             | 1.5E-02 | 2 (1.1, 3.6)       | 2.0E-04 | 22857 16 0  | 360357 136 0 |
| I12.0: Hypertensive chronic kidney disease with stage 5 chronic kidney disease or end stage renal disease | 1.5E-02 | 5.3 (1.4, 21)      | 2.0E-04 | 1500 3 0    | 385985 152 0 |
| Dried fruit intake - any visit - 2 AnyInst                                                                | 1.5E-02 | 5 (1.4, 18)        | 2.5E-04 | 2265 4 0    | 29646 12 0   |
| 3mm asymmetry index irregular astigmatism level R - any visit - normal AnyInst                            | 1.6E-02 | 0.18 (0.047, 0.73) | 2.1E-04 | 99437 39 0  | 2013 3 0     |
| L92: Granulomatous disorders of skin and subcutaneous tissue                                              | 1.6E-02 | 8 (1.5, 43)        | 2.0E-04 | 823 2 0     | 385945 153 0 |
| M80.9: Unspecified osteoporosis with pathological fracture                                                | 1.6E-02 | 7.9 (1.5, 43)      | 2.0E-04 | 813 2 0     | 386672 153 0 |
| Number of days out of 10 with abdominal pain - any visit - 9 days with pain AnyInst                       | 1.6E-02 | 8.8 (1.5, 51)      | 1.9E-04 | 927 2 0     | 43716 15 0   |
| OPCS4 E85.1: Invasive ventilation                                                                         | 1.6E-02 | 5.2 (1.4, 20)      | 2.0E-04 | 1707 3 0    | 349958 141 0 |
| Size of white wine glass drunk - any visit - small 125ml AnyInst                                          | 1.6E-02 | 0.24 (0.075, 0.77) | 1.9E-04 | 18239 2 0   | 24170 14 0   |
| R54: Age-related physical debility                                                                        | 1.6E-02 | 7.7 (1.5, 41)      | 2.0E-04 | 753 2 0     | 385988 153 0 |
| Index for card A in round - any visit - Fir tree 3 overlapping triangles AnyInst                          | 1.6E-02 | 0.68 (0.5, 0.93)   | 2.0E-04 | 187988 60 0 | 241053 111 0 |
| F52: Sexual dysfunction not due to a substance or known physiological condition                           | 1.7E-02 | 7.7 (1.4, 41)      | 2.0E-04 | 680 2 0     | 385485 152 0 |
| I69: Sequelae of cerebrovascular disease                                                                  | 1.7E-02 | 5.2 (1.3, 20)      | 2.0E-04 | 1710 3 0    | 385769 152 0 |
| OPCS4 W37.1: Primary total prosthetic replacement of hip joint using cement                               | 1.7E-02 | 3.1 (1.2, 8)       | 2.0E-04 | 6319 6 0    | 345346 138 0 |

| Phenotype                                                                                                | P value | Odds ratio (CI)      | AAF     | Cases<br>RR RA AA | Controls<br>RR RA AA |
|----------------------------------------------------------------------------------------------------------|---------|----------------------|---------|-------------------|----------------------|
| R60.9: Edema, unspecified                                                                                | 1.7E-02 | 4.1 (1.3, 13)        | 2.0E-04 | 2766 4 0          | 378557 148 0         |
| Device used to enter occupational data - any visit - Desktop computer AnyInst                            | 1.7E-02 | 0.43 (0.22, 0.86)    | 2.1E-04 | 40418 9 0         | 64408 34 0           |
| Liver intake - any visit - 1 AnyInst                                                                     | 1.7E-02 | 0.13 (0.023, 0.69)   | 3.0E-04 | 5113 1 0          | 3108 4 0             |
| C77.9: Secondary and unspecified malignant neoplasm of lymph node, unspecified                           | 1.7E-02 | 7.6 (1.4, 41)        | 2.0E-04 | 648 2 0           | 386836 153 0         |
| Day of week questionnaire completed - any visit - Friday AnyInst                                         | 1.8E-02 | 1.8 (1.1, 3)         | 1.9E-04 | 51044 28 0        | 134385 42 0          |
| J18.1: Lobar pneumonia, unspecified organism                                                             | 1.8E-02 | 2.6 (1.2, 5.8)       | 2.0E-04 | 8248 8 0          | 379022 147 0         |
| Sex of baby - any visit - Male AnyInst                                                                   | 1.8E-02 | 0.063 (0.0064, 0.62) | 2.0E-04 | 5216 0 0          | 7428 5 0             |
| I12: Hypertensive chronic kidney disease                                                                 | 1.8E-02 | 5.1 (1.3, 19)        | 2.0E-04 | 1656 3 0          | 385811 152 0         |
| Types of spread used on bread crackers - any visit - Polyunsaturated margarine on bread crackers AnyInst | 1.8E-02 | 1.9 (1.1, 3.4)       | 1.8E-04 | 50495 26 0        | 92518 25 0           |
| Feelings of worthlessness during worst period of depression - any visit - Yes AnyInst                    | 1.8E-02 | 2.6 (1.2, 5.6)       | 2.0E-04 | 37577 21 0        | 36139 8 0            |
| Feelings of worthlessness during worst period of depression - any visit - No AnyInst                     | 1.8E-02 | 0.39 (0.18, 0.85)    | 2.0E-04 | 36139 8 0         | 37577 21 0           |
| Recent trouble relaxing - any visit - Nearly every day AnyInst                                           | 1.8E-02 | 3.6 (1.2, 10)        | 1.9E-04 | 4287 5 0          | 134836 47 0          |
| Intake of sugar added to cereal - any visit - half AnyInst                                               | 1.8E-02 | 5 (1.3, 19)          | 1.2E-04 | 14164 7 0         | 22674 2 0            |
| OPCS4 A55.9: Unspecified diagnostic spinal puncture                                                      | 1.8E-02 | 3.1 (1.2, 7.7)       | 2.0E-04 | 5412 6 0          | 346253 138 0         |
| OPCS4 L88.1: Percutaneous transluminal laser ablation of long saphenous vein                             | 1.8E-02 | 7.5 (1.4, 40)        | 2.0E-04 | 650 2 0           | 351015 142 0         |
| Z71.2: Person consulting for explanation of examination or test findings                                 | 1.8E-02 | 0.11 (0.019, 0.69)   | 2.0E-04 | 11107 0 0         | 364211 150 0         |
| Ever smoked - any visit - Yes AnyInst                                                                    | 1.8E-02 | 0.69 (0.51, 0.94)    | 2.0E-04 | 262929 90 0       | 165876 81 0          |
| Liver biliary pancreas problem, ICD10: K87 or Self-reported - any visit                                  | 1.8E-02 | 7.3 (1.4, 38)        | 2.1E-04 | 751 2 0           | 327915 135 0         |
| Handedness chirality laterality - any visit - Left handed AnyInst                                        | 1.8E-02 | 1.7 (1.1, 2.6)       | 2.0E-04 | 41001 26 0        | 389112 146 0         |
| Liver biliary pancreas problem, Self-reported - any visit                                                | 1.8E-02 | 7.3 (1.4, 38)        | 2.1E-04 | 794 2 0           | 330572 136 0         |
| Hypertension, ICD10: I10 or Self-reported - any visit <sup>2</sup>                                       | 1.9E-02 | 1.5 (1.1, 2.2)       | 2.1E-04 | 100060 56 0       | 228604 81 0          |
| Other sweets intake - any visit - 1 AnyInst                                                              | 1.9E-02 | 14 (1.5, 130)        | 2.8E-04 | 4660 5 0          | 4302 0 0             |
| L03.0: Cellulitis and acute lymphangitis of finger and toe                                               | 1.9E-02 | 7.3 (1.4, 38)        | 2.0E-04 | 690 2 0           | 386794 153 0         |
| OPCS4 F10.9: Unspecified simple extraction of tooth                                                      | 1.9E-02 | 4.9 (1.3, 19)        | 2.0E-04 | 1641 3 0          | 350024 141 0         |
| Frequency of consuming six or more units of alcohol - any visit - Monthly AnyInst                        | 1.9E-02 | 0.11 (0.018, 0.7)    | 1.7E-04 | 11321 0 0         | 116681 44 0          |
| Fizzy drink intake - any visit - 3 AnyInst                                                               | 2.0E-02 | 8.9 (1.4, 56)        | 1.2E-04 | 1183 2 0          | 28369 5 0            |

| Phenotype                                                                                                          | P value | Odds ratio (CI)    | AAF     | Cases        | Controls     |
|--------------------------------------------------------------------------------------------------------------------|---------|--------------------|---------|--------------|--------------|
|                                                                                                                    |         |                    |         | RR RA AA     | RR RA AA     |
| Illnesses of siblings - any visit - High blood pressure AnyInst                                                    | 2.0E-02 | 1.6 (1.1, 2.2)     | 2.0E-04 | 75887 43 0   | 295405 109 0 |
| Berry intake - any visit - half AnyInst                                                                            | 2.0E-02 | 2.9 (1.2, 7.3)     | 1.8E-04 | 16019 11 0   | 36496 8 0    |
| Hands free device speakerphone use with mobile phone in last 3 month - any visit - More than half the time AnyInst | 2.0E-02 | 0.12 (0.019, 0.71) | 2.1E-04 | 8569 0 0     | 356995 153 0 |
| K61: Abscess of anal and rectal regions                                                                            | 2.0E-02 | 4.8 (1.3, 18)      | 2.0E-04 | 1730 3 0     | 384971 152 0 |
| I63: Cerebral infarction                                                                                           | 2.1E-02 | 3.3 (1.2, 9.3)     | 2.0E-04 | 4511 5 0     | 382181 149 0 |
| OPCS4 U19.1: Implantation of electrocardiography loop recorder                                                     | 2.1E-02 | 6.9 (1.3, 36)      | 2.0E-04 | 936 2 0      | 350729 142 0 |
| R35: Polyuria                                                                                                      | 2.1E-02 | 2.7 (1.2, 6.4)     | 1.9E-04 | 7533 7 0     | 369584 138 0 |
| Number of bread slices with butter margarine - any visit - 6 AnyInst                                               | 2.2E-02 | 4.2 (1.2, 14)      | 1.7E-04 | 3328 4 0     | 118374 37 0  |
| Type milk consumed - any visit - did not have milk AnyInst                                                         | 2.2E-02 | 2.2 (1.1, 4.2)     | 1.9E-04 | 15496 13 0   | 168978 56 0  |
| Sliced bread intake - any visit - 6 AnyInst                                                                        | 2.2E-02 | 3.5 (1.2, 10)      | 1.7E-04 | 4694 5 0     | 137733 43 0  |
| Skin colour - any visit - Fair AnyInst                                                                             | 2.2E-02 | 1.6 (1.1, 2.3)     | 2.0E-04 | 303672 128 0 | 121199 39 0  |
| OPCS4 S08.2: Curettage and cauterisation of lesion of skin NEC                                                     | 2.2E-02 | 6.7 (1.3, 35)      | 2.0E-04 | 929 2 0      | 350736 142 0 |
| R29.8: Other symptoms and signs involving the nervous and musculoskeletal systems                                  | 2.3E-02 | 3.7 (1.2, 12)      | 2.0E-04 | 2851 4 0     | 380356 151 0 |
| R29: Other symptoms and signs involving the nervous and musculoskeletal systems                                    | 2.3E-02 | 2.9 (1.2, 7.3)     | 2.0E-04 | 6027 6 0     | 375014 147 0 |
| OPCS4 M47.3: Removal of urethral catheter from bladder                                                             | 2.3E-02 | 2.7 (1.1, 6.5)     | 2.0E-04 | 6580 7 0     | 345085 137 0 |
| J00: Acute nasopharyngitis [common cold]                                                                           | 2.4E-02 | 3.7 (1.2, 12)      | 2.0E-04 | 2554 4 0     | 376647 148 0 |
| Device used to enter occupational data - any visit - Laptop computer AnyInst                                       | 2.4E-02 | 2 (1.1, 3.6)       | 2.1E-04 | 39025 23 0   | 65801 20 0   |
| Time spent doing vigorous physical activity - any visit - None AnyInst                                             | 2.4E-02 | 1.9 (1.1, 3.4)     | 1.9E-04 | 131929 58 0  | 53500 12 0   |
| N86: Erosion and ectropion of cervix uteri                                                                         | 2.4E-02 | 6.7 (1.3, 35)      | 1.9E-04 | 1105 2 0     | 209055 78 0  |
| Past tobacco smoking - any visit - I have never smoked AnyInst                                                     | 2.4E-02 | 1.4 (1, 2)         | 2.0E-04 | 170865 84 0  | 225768 76 0  |
| Rheumatoid factor reportability - any visit - Not reportable at assay too low AnyInst                              | 2.4E-02 | 0.59 (0.37, 0.93)  | 2.0E-04 | 373485 138 0 | 38056 24 0   |
| OPCS4 P13.2: Female perineorrhaphy                                                                                 | 2.4E-02 | 6.7 (1.3, 35)      | 2.0E-04 | 823 2 0      | 350842 142 0 |
| Maximum frequency of taking cannabis - any visit - Once a month or more but not every week AnyInst                 | 2.4E-02 | 5.4 (1.2, 24)      | 1.7E-04 | 3575 3 0     | 26370 7 0    |
| Been in a confiding relationship as an adult - any visit - Rarely true AnyInst                                     | 2.4E-02 | 3 (1.2, 7.7)       | 1.8E-04 | 6416 6 0     | 129546 44 0  |
| UK Biobank assessment centre - any visit - Newcastle imaging AnyInst                                               | 2.5E-02 | 5.2 (1.2, 22)      | 2.7E-04 | 9735 9 0     | 29018 12 0   |
| J69: Pneumonitis due to solids and liquids                                                                         | 2.5E-02 | 6.5 (1.3, 34)      | 2.0E-04 | 1137 2 0     | 386307 153 0 |
| Detention categories - any visit - Formally detained under Part II Mental Health Act 1983 AnyInst                  | 2.5E-02 | 5.3 (1.2, 23)      | 1.9E-04 | 2669 3 0     | 33692 11 0   |

| Phenotype                                                                                                            | P value | Odds ratio (CI)   | AAF     | Cases        | Controls     |
|----------------------------------------------------------------------------------------------------------------------|---------|-------------------|---------|--------------|--------------|
|                                                                                                                      |         |                   |         | RR RA AA     | RR RA AA     |
| Bring up phlegm sputum mucus on most days - any visit - Yes AnyInst                                                  | 2.5E-02 | 2.6 (1.1, 6.2)    | 2.1E-04 | 9274 8 0     | 98828 37 0   |
| Bring up phlegm sputum mucus on most days - any visit - No AnyInst                                                   | 2.5E-02 | 0.38 (0.16, 0.88) | 2.1E-04 | 98828 37 0   | 9274 8 0     |
| Z09: Encounter for follow-up examination after completed treatment for conditions other than malignant neoplasm      | 2.5E-02 | 0.31 (0.11, 0.86) | 2.0E-04 | 18207 2 0    | 364521 151 0 |
| IPAQ activity group - any visit - moderate AnyInst                                                                   | 2.5E-02 | 1.5 (1, 2.1)      | 2.0E-04 | 142467 69 0  | 206512 68 0  |
| Ordering of blows - any visit - third earliest i e latest AnyInst                                                    | 2.5E-02 | 1.6 (1.1, 2.3)    | 2.0E-04 | 298271 135 0 | 96713 27 0   |
| Result ranking - any visit - third best i e worst AnyInst                                                            | 2.5E-02 | 1.6 (1.1, 2.3)    | 2.0E-04 | 298271 135 0 | 96713 27 0   |
| 3mm regularity index irregular astigmatism level L - any visit - high possibility abnormality AnyInst                | 2.6E-02 | 3.4 (1.2, 9.8)    | 2.0E-04 | 4385 5 0     | 96801 36 0   |
| J69.0: Pneumonitis due to inhalation of food and vomit                                                               | 2.6E-02 | 6.5 (1.3, 33)     | 2.0E-04 | 1098 2 0     | 386387 153 0 |
| M24: Other specific joint derangements                                                                               | 2.6E-02 | 3.6 (1.2, 11)     | 2.0E-04 | 3196 4 0     | 383526 151 0 |
| Melon intake - any visit - 2 AnyInst                                                                                 | 2.6E-02 | 7.9 (1.3, 48)     | 2.3E-04 | 1428 2 0     | 13584 5 0    |
| OPCS4 Z94.3: Left sided operation                                                                                    | 2.6E-02 | 1.5 (1, 2)        | 2.0E-04 | 132881 67 0  | 218784 77 0  |
| Ever had cervical smear test - any visit - No AnyInst                                                                | 2.6E-02 | 3.2 (1.1, 8.9)    | 1.9E-04 | 5066 5 0     | 227806 82 0  |
| Chickenpox, ICD10: B01 or Self-reported - any visit                                                                  | 2.6E-02 | 2.6 (1.1, 6.1)    | 2.1E-04 | 6567 7 0     | 322099 130 0 |
| Destinations on discharge from hospital recoded - any visit - Transfer within NHS provider Medical specialty AnyInst | 2.7E-02 | 6.6 (1.2, 35)     | 2.0E-04 | 1962 2 0     | 341122 136 0 |
| Difference in mobile phone use compared to two years previously - any visit - No AnyInst                             | 2.7E-02 | 0.7 (0.51, 0.96)  | 2.1E-04 | 201566 71 0  | 164163 81 0  |
| N18: Chronic kidney disease                                                                                          | 2.7E-02 | 2.3 (1.1, 5)      | 2.0E-04 | 10130 9 0    | 372275 145 0 |
| R14.0: Abdominal distension                                                                                          | 2.7E-02 | 6.3 (1.2, 32)     | 2.0E-04 | 780 2 0      | 383609 153 0 |
| RGC Any Ischemic Stroke                                                                                              | 2.7E-02 | 2.8 (1.1, 7.2)    | 2.0E-04 | 6249 6 0     | 270105 106 0 |
| Loneliness isolation - any visit - Yes AnyInst                                                                       | 2.7E-02 | 1.5 (1, 2.1)      | 2.0E-04 | 79807 44 0   | 344106 126 0 |
| R25.1: Tremor, unspecified                                                                                           | 2.7E-02 | 6.2 (1.2, 32)     | 2.0E-04 | 1051 2 0     | 384860 153 0 |
| OPCS4 H33.3: Anterior resection of rectum and anastomosis of colon to rectum using staples                           | 2.7E-02 | 6.3 (1.2, 32)     | 2.0E-04 | 833 2 0      | 350832 142 0 |
| H53.0: Amblyopia ex anopsia                                                                                          | 2.7E-02 | 6.3 (1.2, 32)     | 2.0E-04 | 792 2 0      | 386503 153 0 |
| RGC Ankylosing Spondylitis, ICD10 M45 only, HLA-B27 positive background                                              | 2.7E-02 | 14 (1.4, 150)     | 1.6E-04 | 525 1 0      | 30618 9 0    |
| N63: Unspecified lump in breast                                                                                      | 2.7E-02 | 2.8 (1.1, 7.2)    | 1.9E-04 | 6304 6 0     | 195482 70 0  |
| Type of special diet followed - any visit - Low calorie AnyInst                                                      | 2.7E-02 | 2.7 (1.1, 6.7)    | 2.4E-04 | 30105 19 0   | 20527 5 0    |
| A49: Bacterial infection of unspecified site                                                                         | 2.7E-02 | 6.2 (1.2, 31)     | 2.0E-04 | 1114 2 0     | 385399 153 0 |
| serevent 25mcg inhaler - any visit                                                                                   | 2.8E-02 | 6.2 (1.2, 31)     | 2.0E-04 | 1168 2 0     | 319218 129 0 |

| Phenotype                                                                                           | P value | Odds ratio (CI) | AAF     | Cases        | Controls     |
|-----------------------------------------------------------------------------------------------------|---------|-----------------|---------|--------------|--------------|
|                                                                                                     |         |                 |         | RR RA AA     | RR RA AA     |
| Hypertension, Self-reported - any visit                                                             | 2.8E-02 | 1.5 (1, 2.1)    | 2.1E-04 | 115292 62 0  | 216074 76 0  |
| Ever had bowel cancer screening - any visit - No AnyInst                                            | 2.8E-02 | 1.5 (1, 2.2)    | 2.0E-04 | 289067 126 0 | 134851 41 0  |
| Porridge intake - any visit - 2 AnyInst                                                             | 2.8E-02 | 7 (1.2, 39)     | 2.1E-04 | 800 2 0      | 43850 17 0   |
| Carer support indicators - any visit - Yes AnyInst                                                  | 2.8E-02 | 3.4 (1.1, 10)   | 2.9E-04 | 15143 15 0   | 16017 3 0    |
| Time spent doing vigorous physical activity - any visit - 10 30 minutes AnyInst                     | 2.8E-02 | 1.8 (1.1, 3.1)  | 1.9E-04 | 36805 21 0   | 148624 49 0  |
| H01.0: Blepharitis                                                                                  | 2.8E-02 | 4.3 (1.2, 16)   | 2.0E-04 | 1876 3 0     | 381054 152 0 |
| Workplace very noisy - any visit - 141 Often AnyInst                                                | 2.9E-02 | 2.1 (1.1, 4)    | 2.1E-04 | 20894 15 0   | 85854 29 0   |
| oxybutynin - any visit                                                                              | 2.9E-02 | 6.1 (1.2, 31)   | 2.0E-04 | 1069 2 0     | 319317 129 0 |
| J90: Pleural effusion, not elsewhere classified                                                     | 2.9E-02 | 2.6 (1.1, 6)    | 2.0E-04 | 7216 7 0     | 379974 148 0 |
| Type of baguette eaten - any visit - wholemeal AnyInst                                              | 2.9E-02 | 3.2 (1.1, 9.3)  | 2.5E-04 | 5285 6 0     | 26844 10 0   |
| OPCS4 E85.2: Non-invasive ventilation NEC                                                           | 2.9E-02 | 3.5 (1.1, 11)   | 2.0E-04 | 3020 4 0     | 348645 140 0 |
| H61: Other disorders of external ear                                                                | 2.9E-02 | 2.1 (1.1, 4.1)  | 1.9E-04 | 14531 11 0   | 355432 133 0 |
| OPCS4 A52.2: Therapeutic sacral epidural injection                                                  | 2.9E-02 | 3.5 (1.1, 11)   | 2.0E-04 | 3126 4 0     | 348539 140 0 |
| G81.9: Hemiplegia, unspecified                                                                      | 3.0E-02 | 4.3 (1.2, 16)   | 2.0E-04 | 2020 3 0     | 385316 152 0 |
| Size of white wine glass drunk - any visit - medium 175ml AnyInst                                   | 3.0E-02 | 3.7 (1.1, 12)   | 1.9E-04 | 25985 14 0   | 16424 2 0    |
| N90: Other noninflammatory disorders of vulva and perineum                                          | 3.0E-02 | 3.5 (1.1, 11)   | 1.9E-04 | 3230 4 0     | 205355 75 0  |
| Types of spread used on bread crackers - any visit - Low fat olive spread on bread crackers AnyInst | 3.0E-02 | 2.3 (1.1, 4.8)  | 1.8E-04 | 15459 10 0   | 127554 41 0  |
| FI6 conditional arithmetic - any visit - 72 AnyInst                                                 | 3.0E-02 | 6.2 (1.2, 32)   | 1.8E-04 | 1057 2 0     | 95022 33 0   |
| J02: Acute pharyngitis                                                                              | 3.1E-02 | 2.3 (1.1, 4.7)  | 2.0E-04 | 10871 9 0    | 350667 136 0 |
| RGC Any Stroke <sup>2</sup>                                                                         | 3.1E-02 | 1.9 (1.1, 3.5)  | 2.1E-04 | 18046 14 0   | 271922 108 0 |
| Illnesses of mother - any visit - Bowel cancer AnyInst                                              | 3.1E-02 | 1.9 (1.1, 3.3)  | 2.0E-04 | 20755 15 0   | 402437 155 0 |
| R26: Abnormalities of gait and mobility                                                             | 3.2E-02 | 3.4 (1.1, 11)   | 2.0E-04 | 3388 4 0     | 382549 150 0 |
| C79.3: Secondary malignant neoplasm of brain and cerebral meninges                                  | 3.2E-02 | 5.8 (1.2, 29)   | 2.0E-04 | 1143 2 0     | 386342 153 0 |
| K92.2: Gastrointestinal hemorrhage, unspecified                                                     | 3.2E-02 | 2.5 (1.1, 5.8)  | 2.0E-04 | 7785 7 0     | 379636 148 0 |
| Mineral and other dietary supplements - any visit - Fish oil including cod liver oil AnyInst        | 3.2E-02 | 1.9 (1.1, 3.5)  | 1.7E-04 | 139718 55 0  | 50400 11 0   |
| W19: Unspecified fall                                                                               | 3.2E-02 | 2.5 (1.1, 5.8)  | 2.0E-04 | 8499 7 0     | 372198 147 0 |
| G81: Hemiplegia and hemiparesis                                                                     | 3.2E-02 | 4.2 (1.1, 16)   | 2.0E-04 | 2066 3 0     | 385110 152 0 |

| Phenotype                                                                                                 | P value | Odds ratio (CI)    | AAF     | Cases        | Controls     |
|-----------------------------------------------------------------------------------------------------------|---------|--------------------|---------|--------------|--------------|
|                                                                                                           |         |                    |         | RR RA AA     | RR RA AA     |
| Pure fruit vegetable juice intake - any visit - half AnyInst                                              | 3.2E-02 | 0.22 (0.056, 0.88) | 2.2E-04 | 12960 1 0    | 26081 16 0   |
| Never eat eggs dairy wheat sugar - any visit - I eat all of the above AnyInst                             | 3.2E-02 | 1.5 (1, 2.3)       | 2.0E-04 | 335176 145 0 | 93990 26 0   |
| K65: Peritonitis                                                                                          | 3.2E-02 | 5.8 (1.2, 29)      | 2.0E-04 | 1098 2 0     | 386185 153 0 |
| Belittlement by partner or ex partner as an adult - any visit - Very often true AnyInst                   | 3.3E-02 | 4.3 (1.1, 17)      | 1.8E-04 | 2890 3 0     | 136263 47 0  |
| Pure fruit vegetable juice intake - any visit - 3 AnyInst                                                 | 3.3E-02 | 6.3 (1.2, 34)      | 2.2E-04 | 1007 2 0     | 38034 15 0   |
| OPCS O302                                                                                                 | 3.3E-02 | 2.7 (1.1, 6.7)     | 2.0E-04 | 5346 6 0     | 346319 138 0 |
| Low calorie drink intake - any visit - 3 AnyInst                                                          | 3.4E-02 | 3.3 (1.1, 9.8)     | 2.3E-04 | 3872 5 0     | 34423 13 0   |
| OPCS4 M65.3: Endoscopic resection of prostate NEC                                                         | 3.4E-02 | 3.5 (1.1, 11)      | 2.0E-04 | 3114 4 0     | 348551 140 0 |
| Recent poor appetite or overeating - any visit - Nearly every day AnyInst                                 | 3.4E-02 | 3.5 (1.1, 11)      | 1.9E-04 | 3488 4 0     | 135873 48 0  |
| Month of attending assessment centre - any visit - October AnyInst                                        | 3.5E-02 | 1.6 (1, 2.5)       | 2.0E-04 | 41105 25 0   | 389394 147 0 |
| Felt distant from other people in past month - any visit - Extremely AnyInst                              | 3.5E-02 | 6.4 (1.1, 36)      | 2.1E-04 | 1006 2 0     | 61744 24 0   |
| OPCS4 S13.1: Punch biopsy of lesion of skin of head or neck                                               | 3.5E-02 | 4 (1.1, 15)        | 2.0E-04 | 2598 3 0     | 349067 141 0 |
| Physically abused by family as a child - any visit - Often AnyInst                                        | 3.5E-02 | 5.7 (1.1, 29)      | 1.9E-04 | 1185 2 0     | 138071 50 0  |
| OPCS4 Y98.3: Radiology of three body areas (or 20-40 minutes)                                             | 3.6E-02 | 2.7 (1.1, 6.6)     | 2.0E-04 | 6000 6 0     | 345665 138 0 |
| RGC_CKD_CC                                                                                                | 3.6E-02 | 2.5 (1.1, 5.8)     | 2.0E-04 | 7601 7 0     | 353721 139 0 |
| R56.8: Other and unspecified convulsions                                                                  | 3.7E-02 | 4 (1.1, 15)        | 2.0E-04 | 2533 3 0     | 384952 152 0 |
| Degree bothered by feeling heart pound race in the last 3 months - any visit - 602 Bothered a lot AnyInst | 3.7E-02 | 3 (1.1, 8.3)       | 1.9E-04 | 4936 5 0     | 150007 53 0  |
| N99.3: Prolapse of vaginal vault after hysterectomy                                                       | 3.7E-02 | 11 (1.2, 100)      | 1.9E-04 | 564 1 0      | 228322 85 0  |
| K92: Other diseases of digestive system                                                                   | 3.7E-02 | 2.1 (1, 4.2)       | 2.0E-04 | 12713 10 0   | 372417 144 0 |
| Frequency of consuming six or more units of alcohol - any visit - Daily or almost daily AnyInst           | 3.7E-02 | 3.5 (1.1, 11)      | 1.7E-04 | 4451 4 0     | 123551 40 0  |
| Mixed vegetable intake - any visit - 1 AnyInst                                                            | 3.7E-02 | 0.33 (0.12, 0.94)  | 2.4E-04 | 21014 6 0    | 8490 8 0     |
| Wants to stop smoking - any visit - No probably not AnyInst                                               | 3.7E-02 | 3.6 (1.1, 12)      | 1.7E-04 | 8240 6 0     | 24733 5 0    |
| OPCS4 Q17.8: Other specified therapeutic endoscopic operations on uterus                                  | 3.7E-02 | 5.6 (1.1, 29)      | 2.0E-04 | 643 2 0      | 351022 142 0 |
| Satisfaction with bowel habits - any visit - 2 AnyInst                                                    | 3.7E-02 | 0.37 (0.15, 0.94)  | 1.8E-04 | 21578 3 0    | 132653 54 0  |
| Epilepsy, Self-reported - any visit                                                                       | 3.8E-02 | 3.3 (1.1, 10)      | 2.1E-04 | 3587 4 0     | 327779 134 0 |
| FI5 family relationship calculation - any visit - cousin AnyInst                                          | 3.8E-02 | 0.51 (0.27, 0.96)  | 1.8E-04 | 59412 15 0   | 47294 24 0   |
| O68.0: Labour and delivery complicated by fetal heart rate anomaly                                        | 3.8E-02 | 6.1 (1.1, 34)      | 1.9E-04 | 1404 2 0     | 227482 84 0  |



| Phenotype                                                                                                            | P value | Odds ratio (CI)   | AAF     | Cases        |          | Controls     |          |
|----------------------------------------------------------------------------------------------------------------------|---------|-------------------|---------|--------------|----------|--------------|----------|
|                                                                                                                      |         |                   |         | RR RA AA     | RR RA AA | RR RA AA     | RR RA AA |
| Chocolate bar intake - any visit - quarter AnyInst                                                                   | 3.8E-02 | 7.4 (1.1, 49)     | 9.9E-05 | 2276 2 0     |          | 22852 3 0    |          |
| C56: Malignant neoplasm of ovary                                                                                     | 3.8E-02 | 5.5 (1.1, 27)     | 1.9E-04 | 1184 2 0     |          | 210237 78 0  |          |
| K92.0: Hematemesis                                                                                                   | 3.8E-02 | 3.9 (1.1, 14)     | 2.0E-04 | 2298 3 0     |          | 385149 152 0 |          |
| Instant coffee intake - any visit - 4 AnyInst                                                                        | 3.8E-02 | 2.1 (1, 4.2)      | 2.2E-04 | 15574 12 0   |          | 88533 34 0   |          |
| R59: Enlarged lymph nodes                                                                                            | 3.8E-02 | 3.2 (1.1, 9.9)    | 2.0E-04 | 3661 4 0     |          | 380186 150 0 |          |
| UK Biobank assessment centre - any visit - Middlesborough AnyInst                                                    | 3.9E-02 | 0.39 (0.16, 0.95) | 2.0E-04 | 18960 4 0    |          | 411539 168 0 |          |
| M24.1: Other articular cartilage disorders                                                                           | 3.9E-02 | 5.4 (1.1, 26)     | 2.0E-04 | 1155 2 0     |          | 386313 153 0 |          |
| How are people in household related to participant - any visit - Husband wife or partner AnyInst                     | 3.9E-02 | 0.58 (0.35, 0.97) | 1.9E-04 | 316924 114 0 |          | 32740 20 0   |          |
| H93.29: Other abnormal auditory perceptions                                                                          | 3.9E-02 | 5.3 (1.1, 26)     | 2.0E-04 | 1158 2 0     |          | 382023 152 0 |          |
| H93.299: Other abnormal auditory perceptions, unspecified ear                                                        | 3.9E-02 | 5.3 (1.1, 26)     | 2.0E-04 | 1158 2 0     |          | 382023 152 0 |          |
| Length of longest manic irritable episode - any visit - Less than a week AnyInst                                     | 3.9E-02 | 2.9 (1.1, 8)      | 2.9E-04 | 5602 7 0     |          | 23198 10 0   |          |
| N99: Intraoperative and postprocedural complications and disorders of genitourinary system, not elsewhere classified | 4.0E-02 | 5.3 (1.1, 26)     | 2.0E-04 | 1363 2 0     |          | 386023 153 0 |          |
| OPCS4 P23.1: Anterior and posterior colporrhaphy NEC                                                                 | 4.0E-02 | 4 (1.1, 15)       | 2.0E-04 | 2349 3 0     |          | 349316 141 0 |          |
| Vitamin and or mineral supplement use - any visit - Vitamin E AnyInst                                                | 4.0E-02 | 3 (1, 8.5)        | 2.1E-04 | 4698 5 0     |          | 86688 33 0   |          |
| H93.2: Other abnormal auditory perceptions                                                                           | 4.0E-02 | 5.3 (1.1, 26)     | 2.0E-04 | 1174 2 0     |          | 382006 152 0 |          |
| I10: Essential (primary) hypertension                                                                                | 4.1E-02 | 1.5 (1, 2.1)      | 2.0E-04 | 104984 54 0  |          | 268794 94 0  |          |
| Friendships satisfaction - any visit - Very unhappy AnyInst                                                          | 4.1E-02 | 5.7 (1.1, 30)     | 2.1E-04 | 790 2 0      |          | 174766 73 0  |          |
| M13.9: Arthritis, unspecified                                                                                        | 4.1E-02 | 5.2 (1.1, 26)     | 2.0E-04 | 1280 2 0     |          | 386205 153 0 |          |
| Workplace full of chemical or other fumes - any visit - 131 Sometimes AnyInst                                        | 4.1E-02 | 1.9 (1, 3.7)      | 2.1E-04 | 25527 17 0   |          | 79280 28 0   |          |
| Someone to take to doctor when needed as a child - any visit - Never true AnyInst                                    | 4.1E-02 | 3.9 (1.1, 15)     | 1.9E-04 | 2772 3 0     |          | 135856 49 0  |          |
| Grape intake - any visit - 3 AnyInst                                                                                 | 4.1E-02 | 5.6 (1.1, 29)     | 2.0E-04 | 1143 2 0     |          | 49439 18 0   |          |
| I69.4: Sequelae of stroke, not specified as haemorrhage or infarction                                                | 4.1E-02 | 5.2 (1.1, 25)     | 2.0E-04 | 1219 2 0     |          | 386266 153 0 |          |
| Size of red wine glass drunk - any visit - small 125ml AnyInst                                                       | 4.2E-02 | 2.5 (1, 5.8)      | 2.0E-04 | 21334 13 0   |          | 32152 8 0    |          |
| H04.1: Other disorders of lacrimal gland                                                                             | 4.2E-02 | 9.9 (1.1, 90)     | 2.0E-04 | 519 1 0      |          | 386960 154 0 |          |
| G45.9: Transient cerebral ischemic attack, unspecified                                                               | 4.2E-02 | 3.8 (1, 14)       | 2.0E-04 | 2490 3 0     |          | 384983 152 0 |          |
| Length of mobile phone use - any visit - Two to four years AnyInst                                                   | 4.2E-02 | 1.5 (1, 2.1)      | 2.0E-04 | 76128 39 0   |          | 349079 130 0 |          |
| OPCS4 P05.4: Excision of lesion of vulva NEC                                                                         | 4.3E-02 | 5.2 (1.1, 26)     | 2.0E-04 | 1149 2 0     |          | 350516 142 0 |          |

| <b>Phenotype</b>                                                                                                    | <b>P value</b> | <b>Odds ratio (CI)</b> | <b>AAF</b> | <b>Cases<br/>RR RA AA</b> | <b>Controls<br/>RR RA AA</b> |
|---------------------------------------------------------------------------------------------------------------------|----------------|------------------------|------------|---------------------------|------------------------------|
| Avocado intake - any visit - half AnyInst                                                                           | 4.3E-02        | 0.17 (0.031, 0.94)     | 3.0E-04    | 6074 1 0                  | 5571 6 0                     |
| Diagnosed with coeliac disease or gluten sensitivity - any visit - Yes AnyInst                                      | 4.3E-02        | 3.9 (1, 15)            | 1.9E-04    | 2908 3 0                  | 150978 54 0                  |
| Diagnosed with coeliac disease or gluten sensitivity - any visit - No AnyInst                                       | 4.3E-02        | 0.25 (0.067, 0.96)     | 1.9E-04    | 150978 54 0               | 2908 3 0                     |
| M80: Osteoporosis with current pathological fracture                                                                | 4.3E-02        | 5.1 (1.1, 25)          | 2.0E-04    | 1186 2 0                  | 386109 153 0                 |
| Recent changes in speed amount of moving or speaking - any visit - More than half the days AnyInst                  | 4.3E-02        | 5.2 (1.1, 26)          | 1.9E-04    | 1122 2 0                  | 138187 50 0                  |
| Frequency of tenseness restlessness in last 2 weeks - any visit - Not at all AnyInst                                | 4.4E-02        | 1.5 (1, 2.1)           | 2.0E-04    | 311374 135 0              | 103656 32 0                  |
| OPCS4 H58.2: Drainage of perianal abscess                                                                           | 4.4E-02        | 5.1 (1, 25)            | 2.0E-04    | 1073 2 0                  | 350592 142 0                 |
| Leek intake - any visit - 1 AnyInst                                                                                 | 4.4E-02        | 0.21 (0.046, 0.96)     | 2.3E-04    | 8364 1 0                  | 8788 7 0                     |
| Types of spread used on bread crackers - any visit - Normal fat polyunsaturated margarine on bread crackers AnyInst | 4.4E-02        | 2.3 (1, 5.3)           | 1.8E-04    | 10353 8 0                 | 132660 43 0                  |
| Triplet correct right - any visit - yes AnyInst                                                                     | 4.4E-02        | 0.19 (0.039, 0.96)     | 2.1E-04    | 171418 71 0               | 1285 2 0                     |
| Handedness chirality laterality - any visit - Right handed AnyInst                                                  | 4.5E-02        | 0.65 (0.42, 0.99)      | 2.0E-04    | 382077 144 0              | 48036 28 0                   |
| M25: Other joint disorder, not elsewhere classified                                                                 | 4.5E-02        | 0.56 (0.32, 0.99)      | 2.0E-04    | 46004 11 0                | 301761 127 0                 |
| Thickness of butter margarine spread on sliced bread - any visit - medium AnyInst                                   | 4.6E-02        | 0.49 (0.25, 0.99)      | 1.6E-04    | 57938 13 0                | 45369 20 0                   |
| White wine intake - any visit - 1 AnyInst                                                                           | 4.6E-02        | 0.33 (0.11, 0.98)      | 1.8E-04    | 20760 3 0                 | 23321 13 0                   |
| I67.8: Other specified cerebrovascular diseases                                                                     | 4.6E-02        | 5 (1, 24)              | 2.0E-04    | 1479 2 0                  | 386006 153 0                 |
| OPCS Z924                                                                                                           | 4.6E-02        | 2.5 (1, 6.2)           | 2.0E-04    | 6888 6 0                  | 344777 138 0                 |
| RGC Ankylosing Spondylitis, ICD and self reported, HLA-B27 positive background                                      | 4.7E-02        | 10 (1, 100)            | 1.6E-04    | 714 1 0                   | 30618 9 0                    |
| N95.2: Postmenopausal atrophic vaginitis                                                                            | 4.7E-02        | 5 (1, 25)              | 1.9E-04    | 1315 2 0                  | 227571 84 0                  |
| Abdominal discomfort pain for 6 months or longer - any visit - Yes AnyInst                                          | 4.7E-02        | 0.45 (0.21, 0.99)      | 1.6E-04    | 43513 9 0                 | 39667 17 0                   |
| Abdominal discomfort pain for 6 months or longer - any visit - No AnyInst                                           | 4.7E-02        | 2.2 (1, 4.8)           | 1.6E-04    | 39667 17 0                | 43513 9 0                    |
| OPCS4 H52.3: Injection of sclerosing substance into haemorrhoid                                                     | 4.7E-02        | 4.9 (1, 24)            | 2.0E-04    | 1234 2 0                  | 350431 142 0                 |
| Type of fat oil used in cooking - any visit - Normal fat soft margarine AnyInst                                     | 4.8E-02        | 5 (1, 24)              | 1.9E-04    | 1333 2 0                  | 166606 61 0                  |
| OPCS Z865                                                                                                           | 4.8E-02        | 4.9 (1, 24)            | 2.0E-04    | 1395 2 0                  | 350270 142 0                 |
| Milk intake - any visit - 1 AnyInst                                                                                 | 4.8E-02        | 8.8 (1, 76)            | 2.7E-04    | 8350 7 0                  | 4753 0 0                     |
| Illnesses of siblings - any visit - 17 None of the above group 1 AnyInst                                            | 4.8E-02        | 0.72 (0.51, 1)         | 2.0E-04    | 231190 84 0               | 140102 68 0                  |
| Country of birth UK elsewhere - any visit - Elsewhere AnyInst                                                       | 4.9E-02        | 2.1 (1, 4.2)           | 2.0E-04    | 17974 19 0                | 412055 153 0                 |

Rodriguez-Flores et al.

*NOTCH3* p.Arg1231Cys is Markedly Enriched in South Asians and Associated with Stroke

Version 34

17 June 2024

1. ExWAS summary statistics were available for 6,396 binary phenotypes out of 10,168 phenotypes tested for association in UKB 450K Europeans. Shown is the phenotype code, p value, odds ratio with 95% confidence interval, case RR|RA|AA counts, controls RR|RA|AA counts. Shown are phenotypes with p values < 0.05.
2. Highlight of phenotypes mentioned in the results section.

**Supplementary Table 20. Quantitative Phenotypes Associated with *NOTCH3* p.Arg1231Cys in UKB 450 K European Participants<sup>1</sup>.**

| Phenotype                                                                                    | P value  | Beta (95% CI)   | AAF     | Cases (RR RA AA) | Units           |
|----------------------------------------------------------------------------------------------|----------|-----------------|---------|------------------|-----------------|
| Mean MD in external capsule on FA skeleton right - imaging visit - value 0                   | 5.40E-10 | 1.4 (0.96, 1.8) | 0.00028 | 33550 19 0       | AU              |
| Mean MD in superior corona radiata on FA skeleton right - imaging visit - value 0            | 7.60E-10 | 1.4 (0.94, 1.8) | 0.00028 | 33550 19 0       | AU              |
| Mean L3 in external capsule on FA skeleton right - imaging visit - value 0                   | 2.30E-09 | 1.3 (0.9, 1.8)  | 0.00028 | 33550 19 0       | AU              |
| Mean MD in superior corona radiata on FA skeleton left - imaging visit - value 0             | 2.30E-09 | 1.3 (0.89, 1.8) | 0.00028 | 33550 19 0       | AU              |
| Mean L2 in external capsule on FA skeleton right - imaging visit - value 0                   | 3.60E-09 | 1.3 (0.89, 1.8) | 0.00028 | 33550 19 0       | AU              |
| Mean MD in external capsule on FA skeleton left - imaging visit - value 0                    | 4.20E-09 | 1.3 (0.88, 1.8) | 0.00028 | 33550 19 0       | AU              |
| Mean L2 in external capsule on FA skeleton left - imaging visit - value 0                    | 5.40E-09 | 1.3 (0.87, 1.8) | 0.00028 | 33550 19 0       | AU              |
| Weighted mean MD in tract superior thalamic radiation left - imaging visit - value 0         | 7.20E-09 | 1.3 (0.86, 1.7) | 0.00028 | 33548 19 0       | AU              |
| Weighted mean L3 in tract superior thalamic radiation left - imaging visit - value 0         | 7.70E-09 | 1.3 (0.86, 1.7) | 0.00028 | 33548 19 0       | AU              |
| Weighted mean MD in tract superior thalamic radiation right - imaging visit - value 0        | 8.30E-09 | 1.3 (0.85, 1.7) | 0.00028 | 33548 19 0       | AU              |
| Mean MD in posterior limb of internal capsule on FA skeleton right - imaging visit - value 0 | 1.20E-08 | 1.3 (0.85, 1.7) | 0.00028 | 33550 19 0       | AU              |
| Mean MD in posterior corona radiata on FA skeleton right - imaging visit - value 0           | 1.30E-08 | 1.3 (0.83, 1.7) | 0.00028 | 33550 19 0       | AU              |
| Mean L3 in posterior corona radiata on FA skeleton right - imaging visit - value 0           | 2.20E-08 | 1.3 (0.81, 1.7) | 0.00028 | 33550 19 0       | AU              |
| Mean L3 in external capsule on FA skeleton left - imaging visit - value 0                    | 2.40E-08 | 1.3 (0.82, 1.7) | 0.00028 | 33550 19 0       | AU              |
| Mean ISOVF in superior corona radiata on FA skeleton right - imaging visit - value 0         | 2.40E-08 | 1.3 (0.82, 1.7) | 0.00028 | 33548 19 0       | AU              |
| Mean L3 in superior corona radiata on FA skeleton right - imaging visit - value 0            | 2.50E-08 | 1.2 (0.81, 1.7) | 0.00028 | 33550 19 0       | AU              |
| Mean MD in anterior limb of internal capsule on FA skeleton right - imaging visit - value 0  | 3.30E-08 | 1.2 (0.8, 1.7)  | 0.00028 | 33550 19 0       | AU              |
| Weighted mean L3 in tract superior thalamic radiation right - imaging visit - value 0        | 3.30E-08 | 1.2 (0.8, 1.7)  | 0.00028 | 33548 19 0       | AU              |
| Mean L2 in anterior limb of internal capsule on FA skeleton right - imaging visit - value 0  | 3.50E-08 | 1.2 (0.8, 1.7)  | 0.00028 | 33550 19 0       | AU              |
| Mean L1 in superior corona radiata on FA skeleton right - imaging visit - value 0            | 3.80E-08 | 1.2 (0.79, 1.7) | 0.00028 | 33550 19 0       | AU              |
| Mean L3 in superior corona radiata on FA skeleton left - imaging visit - value 0             | 4.40E-08 | 1.2 (0.79, 1.7) | 0.00028 | 33550 19 0       | AU              |
| Mean L3 in posterior limb of internal capsule on FA skeleton right - imaging visit - value 0 | 7.60E-08 | 1.2 (0.77, 1.7) | 0.00028 | 33550 19 0       | AU              |
| Mean L2 in anterior limb of internal capsule on FA skeleton left - imaging visit - value 0   | 9.60E-08 | 1.2 (0.76, 1.6) | 0.00028 | 33550 19 0       | AU              |
| Volume of WM hypointensities whole brain - imaging visit - value 0                           | 1.10E-07 | 1.1 (0.72, 1.6) | 0.00029 | 35921 21 0       | mm <sup>3</sup> |
| Weighted mean L2 in tract superior thalamic radiation left - imaging visit - value 0         | 1.40E-07 | 1.2 (0.74, 1.6) | 0.00028 | 33548 19 0       | AU              |

| Phenotype                                                                                     | P value  | Beta (95% CI)      | AAF     | Cases (RR RA AA) | Units |
|-----------------------------------------------------------------------------------------------|----------|--------------------|---------|------------------|-------|
| Mean L2 in posterior corona radiata on FA skeleton right - imaging visit - value 0            | 1.50E-07 | 1.2 (0.74, 1.6)    | 0.00028 | 33550 19 0       | AU    |
| Weighted mean L2 in tract superior thalamic radiation right - imaging visit - value 0         | 1.60E-07 | 1.2 (0.74, 1.6)    | 0.00028 | 33548 19 0       | AU    |
| Mean L1 in external capsule on FA skeleton right - imaging visit - value 0                    | 1.60E-07 | 1.2 (0.74, 1.6)    | 0.00028 | 33550 19 0       | AU    |
| Mean L1 in superior corona radiata on FA skeleton left - imaging visit - value 0              | 1.70E-07 | 1.2 (0.73, 1.6)    | 0.00028 | 33550 19 0       | AU    |
| Weighted mean L2 in tract corticospinal tract right - imaging visit - value 0                 | 2.20E-07 | 1.2 (0.73, 1.6)    | 0.00028 | 33548 19 0       | AU    |
| Weighted mean L3 in tract corticospinal tract right - imaging visit - value 0                 | 2.80E-07 | 1.2 (0.72, 1.6)    | 0.00028 | 33548 19 0       | AU    |
| Mean ICVF in external capsule on FA skeleton left - imaging visit - value 0                   | 3.20E-07 | -1.1 (-1.6, -0.7)  | 0.00028 | 33548 19 0       | AU    |
| Mean FA in anterior limb of internal capsule on FA skeleton left - imaging visit - value 0    | 3.50E-07 | -1.1 (-1.6, -0.7)  | 0.00028 | 33550 19 0       | AU    |
| Weighted mean L3 in tract anterior thalamic radiation right - imaging visit - value 0         | 3.80E-07 | 1.1 (0.7, 1.6)     | 0.00028 | 33548 19 0       | AU    |
| Mean L3 in anterior limb of internal capsule on FA skeleton left - imaging visit - value 0    | 5.40E-07 | 1.1 (0.69, 1.6)    | 0.00028 | 33550 19 0       | AU    |
| Weighted mean MD in tract anterior thalamic radiation right - imaging visit - value 0         | 5.70E-07 | 1.1 (0.69, 1.6)    | 0.00028 | 33548 19 0       | AU    |
| Mean MD in anterior limb of internal capsule on FA skeleton left - imaging visit - value 0    | 6.90E-07 | 1.1 (0.68, 1.6)    | 0.00028 | 33550 19 0       | AU    |
| Mean L3 in anterior limb of internal capsule on FA skeleton right - imaging visit - value 0   | 7.00E-07 | 1.1 (0.68, 1.6)    | 0.00028 | 33550 19 0       | AU    |
| Mean MD in posterior corona radiata on FA skeleton left - imaging visit - value 0             | 7.00E-07 | 1.1 (0.67, 1.5)    | 0.00028 | 33550 19 0       | AU    |
| Mean L2 in posterior corona radiata on FA skeleton left - imaging visit - value 0             | 7.30E-07 | 1.1 (0.67, 1.6)    | 0.00028 | 33550 19 0       | AU    |
| Mean L2 in superior corona radiata on FA skeleton right - imaging visit - value 0             | 7.70E-07 | 1.1 (0.67, 1.5)    | 0.00028 | 33550 19 0       | AU    |
| Mean ISOVF in external capsule on FA skeleton right - imaging visit - value 0                 | 8.40E-07 | 1.1 (0.67, 1.6)    | 0.00028 | 33548 19 0       | AU    |
| Mean ICVF in external capsule on FA skeleton right - imaging visit - value 0                  | 8.50E-07 | -1.1 (-1.5, -0.66) | 0.00028 | 33548 19 0       | AU    |
| Mean L1 in posterior corona radiata on FA skeleton right - imaging visit - value 0            | 9.40E-07 | 1.1 (0.66, 1.5)    | 0.00028 | 33550 19 0       | AU    |
| Weighted mean ISOVF in tract superior thalamic radiation right - imaging visit - value 0      | 1.10E-06 | 1.1 (0.66, 1.5)    | 0.00028 | 33547 19 0       | AU    |
| Mean FA in anterior limb of internal capsule on FA skeleton right - imaging visit - value 0   | 1.20E-06 | -1.1 (-1.5, -0.65) | 0.00028 | 33550 19 0       | AU    |
| Mean FA in external capsule on FA skeleton right - imaging visit - value 0                    | 1.20E-06 | -1.1 (-1.5, -0.65) | 0.00028 | 33550 19 0       | AU    |
| Mean MD in superior fronto occipital fasciculus on FA skeleton left - imaging visit - value 0 | 1.50E-06 | 1.1 (0.64, 1.5)    | 0.00028 | 33550 19 0       | AU    |
| Mean L1 in external capsule on FA skeleton left - imaging visit - value 0                     | 1.60E-06 | 1.1 (0.64, 1.5)    | 0.00028 | 33550 19 0       | AU    |
| Weighted mean L1 in tract superior thalamic radiation right - imaging visit - value 0         | 1.60E-06 | 1.1 (0.63, 1.5)    | 0.00028 | 33548 19 0       | AU    |
| Mean ICVF in posterior corona radiata on FA skeleton right - imaging visit - value 0          | 1.70E-06 | -1.1 (-1.5, -0.63) | 0.00028 | 33548 19 0       | AU    |
| Weighted mean MD in tract corticospinal tract right - imaging visit - value 0                 | 1.90E-06 | 1.1 (0.64, 1.5)    | 0.00028 | 33548 19 0       | AU    |

| Phenotype                                                                                                        | P value  | Beta (95% CI)      | AAF     | Cases (RR RA AA) | Units           |
|------------------------------------------------------------------------------------------------------------------|----------|--------------------|---------|------------------|-----------------|
| Mean ICVF in superior corona radiata on FA skeleton left - imaging visit - value 0                               | 2.10E-06 | -1 (-1.5, -0.61)   | 0.00028 | 33548 19 0       | AU              |
| Mean L3 in posterior corona radiata on FA skeleton left - imaging visit - value 0                                | 2.20E-06 | 1.1 (0.62, 1.5)    | 0.00028 | 33550 19 0       | AU              |
| Volume of grey matter in Caudate right - imaging visit - value 0                                                 | 2.20E-06 | 1 (0.61, 1.5)      | 0.00028 | 35591 20 0       | mm <sup>3</sup> |
| Mean ISOVF in superior corona radiata on FA skeleton left - imaging visit - value 0                              | 2.30E-06 | 1.1 (0.63, 1.5)    | 0.00028 | 33548 19 0       | AU              |
| Mean MD in posterior limb of internal capsule on FA skeleton left - imaging visit - value 0                      | 2.40E-06 | 1.1 (0.62, 1.5)    | 0.00028 | 33550 19 0       | AU              |
| Weighted mean L1 in tract anterior thalamic radiation right - imaging visit - value 0                            | 2.60E-06 | 1.1 (0.62, 1.5)    | 0.00028 | 33548 19 0       | AU              |
| Mean FA in external capsule on FA skeleton left - imaging visit - value 0                                        | 2.70E-06 | -1.1 (-1.5, -0.61) | 0.00028 | 33550 19 0       | AU              |
| Total volume of white matter hyperintensities from T1 and T2 FLAIR images - imaging visit - value 0 <sup>2</sup> | 3.00E-06 | 1.1 (0.61, 1.5)    | 0.00028 | 34354 19 0       | mm <sup>3</sup> |
| Mean ISOVF in external capsule on FA skeleton left - imaging visit - value 0                                     | 3.80E-06 | 1 (0.6, 1.5)       | 0.00028 | 33548 19 0       | AU              |
| Weighted mean L3 in tract corticospinal tract left - imaging visit - value 0                                     | 5.00E-06 | 1 (0.59, 1.5)      | 0.00028 | 33548 19 0       | AU              |
| Weighted mean L1 in tract superior thalamic radiation left - imaging visit - value 0                             | 5.40E-06 | 1 (0.58, 1.5)      | 0.00028 | 33548 19 0       | AU              |
| Mean FA in posterior corona radiata on FA skeleton right - imaging visit - value 0                               | 5.40E-06 | -1 (-1.5, -0.58)   | 0.00028 | 33550 19 0       | AU              |
| Weighted mean ISOVF in tract superior thalamic radiation left - imaging visit - value 0                          | 5.50E-06 | 1 (0.58, 1.5)      | 0.00028 | 33547 19 0       | AU              |
| Mean ICVF in superior corona radiata on FA skeleton right - imaging visit - value 0                              | 5.60E-06 | -1 (-1.4, -0.57)   | 0.00028 | 33548 19 0       | AU              |
| Mean L3 in superior fronto occipital fasciculus on FA skeleton left - imaging visit - value 0                    | 8.00E-06 | 1 (0.57, 1.4)      | 0.00028 | 33550 19 0       | AU              |
| Mean L3 in posterior limb of internal capsule on FA skeleton left - imaging visit - value 0                      | 8.40E-06 | 1 (0.56, 1.4)      | 0.00028 | 33550 19 0       | AU              |
| Weighted mean L2 in tract anterior thalamic radiation right - imaging visit - value 0                            | 9.10E-06 | 1 (0.56, 1.4)      | 0.00028 | 33548 19 0       | AU              |
| Weighted mean MD in tract corticospinal tract left - imaging visit - value 0                                     | 1.10E-05 | 1 (0.55, 1.4)      | 0.00028 | 33548 19 0       | AU              |
| Mean ISOVF in anterior limb of internal capsule on FA skeleton right - imaging visit - value 0                   | 1.20E-05 | 0.99 (0.55, 1.4)   | 0.00028 | 33548 19 0       | AU              |
| Mean L2 in posterior thalamic radiation on FA skeleton left - imaging visit - value 0                            | 1.20E-05 | 0.98 (0.54, 1.4)   | 0.00028 | 33550 19 0       | AU              |
| Volume of grey matter in Putamen left - imaging visit - value 0                                                  | 1.50E-05 | 0.94 (0.52, 1.4)   | 0.00028 | 35591 20 0       | mm <sup>3</sup> |
| Mean MD in superior fronto occipital fasciculus on FA skeleton right - imaging visit - value 0                   | 1.50E-05 | 0.98 (0.54, 1.4)   | 0.00028 | 33550 19 0       | AU              |
| Weighted mean L3 in tract anterior thalamic radiation left - imaging visit - value 0                             | 1.60E-05 | 0.97 (0.53, 1.4)   | 0.00028 | 33548 19 0       | AU              |
| Volume of grey matter in Caudate left - imaging visit - value 0                                                  | 1.60E-05 | 0.94 (0.51, 1.4)   | 0.00028 | 35591 20 0       | mm <sup>3</sup> |
| Mean ISOVF in posterior limb of internal capsule on FA skeleton right - imaging visit - value 0                  | 1.60E-05 | 0.98 (0.54, 1.4)   | 0.00028 | 33548 19 0       | AU              |
| Volume of AV right hemisphere - imaging visit - value 0                                                          | 1.70E-05 | 0.92 (0.5, 1.3)    | 0.00029 | 35921 21 0       | mm <sup>3</sup> |
| Mean L2 in superior corona radiata on FA skeleton left - imaging visit - value 0                                 | 1.80E-05 | 0.96 (0.52, 1.4)   | 0.00028 | 33550 19 0       | AU              |

| Phenotype                                                                                         | P value  | Beta (95% CI)       | AAF     | Cases (RR RA AA) | Units |
|---------------------------------------------------------------------------------------------------|----------|---------------------|---------|------------------|-------|
| Mean L1 in posterior corona radiata on FA skeleton left - imaging visit - value 0                 | 1.80E-05 | 0.95 (0.52, 1.4)    | 0.00028 | 33550 19 0       | AU    |
| Weighted mean FA in tract superior thalamic radiation left - imaging visit - value 0              | 2.00E-05 | -0.96 (-1.4, -0.52) | 0.00028 | 33548 19 0       | AU    |
| Weighted mean MD in tract anterior thalamic radiation left - imaging visit - value 0              | 2.00E-05 | 0.96 (0.52, 1.4)    | 0.00028 | 33548 19 0       | AU    |
| Mean ISOVF in posterior corona radiata on FA skeleton right - imaging visit - value 0             | 2.00E-05 | 0.97 (0.52, 1.4)    | 0.00028 | 33548 19 0       | AU    |
| Mean L2 in superior fronto occipital fasciculus on FA skeleton right - imaging visit - value 0    | 2.00E-05 | 0.97 (0.52, 1.4)    | 0.00028 | 33550 19 0       | AU    |
| Mean L2 in retrolenticular part of internal capsule on FA skeleton left - imaging visit - value 0 | 2.40E-05 | 0.95 (0.51, 1.4)    | 0.00028 | 33550 19 0       | AU    |
| Mean L3 in superior fronto occipital fasciculus on FA skeleton right - imaging visit - value 0    | 2.50E-05 | 0.95 (0.51, 1.4)    | 0.00028 | 33550 19 0       | AU    |
| Mean L1 in superior fronto occipital fasciculus on FA skeleton left - imaging visit - value 0     | 2.80E-05 | 0.95 (0.51, 1.4)    | 0.00028 | 33550 19 0       | AU    |
| Mean intensity of WM hypointensities whole brain - imaging visit - value 0                        | 2.90E-05 | 0.91 (0.48, 1.3)    | 0.00029 | 35921 21 0       | AU    |
| Mean MD in posterior thalamic radiation on FA skeleton left - imaging visit - value 0             | 3.00E-05 | 0.93 (0.49, 1.4)    | 0.00028 | 33550 19 0       | AU    |
| Weighted mean L2 in tract anterior thalamic radiation left - imaging visit - value 0              | 3.30E-05 | 0.93 (0.49, 1.4)    | 0.00028 | 33548 19 0       | AU    |
| Mean L3 in posterior thalamic radiation on FA skeleton left - imaging visit - value 0             | 3.50E-05 | 0.92 (0.49, 1.4)    | 0.00028 | 33550 19 0       | AU    |
| Weighted mean L2 in tract posterior thalamic radiation left - imaging visit - value 0             | 3.60E-05 | 0.93 (0.49, 1.4)    | 0.00028 | 33548 19 0       | AU    |
| Mean L3 in anterior corona radiata on FA skeleton right - imaging visit - value 0                 | 4.20E-05 | 0.91 (0.48, 1.3)    | 0.00028 | 33550 19 0       | AU    |
| Weighted mean ICVF in tract superior thalamic radiation left - imaging visit - value 0            | 4.20E-05 | -0.91 (-1.3, -0.47) | 0.00028 | 33547 19 0       | AU    |
| Weighted mean FA in tract anterior thalamic radiation right - imaging visit - value 0             | 4.20E-05 | -0.92 (-1.4, -0.48) | 0.00028 | 33548 19 0       | AU    |
| Weighted mean FA in tract anterior thalamic radiation left - imaging visit - value 0              | 4.50E-05 | -0.92 (-1.4, -0.48) | 0.00028 | 33548 19 0       | AU    |
| Weighted mean FA in tract corticospinal tract right - imaging visit - value 0                     | 4.50E-05 | -0.92 (-1.4, -0.48) | 0.00028 | 33548 19 0       | AU    |
| Mean L2 in posterior thalamic radiation on FA skeleton right - imaging visit - value 0            | 4.80E-05 | 0.91 (0.47, 1.4)    | 0.00028 | 33550 19 0       | AU    |
| Weighted mean MD in tract posterior thalamic radiation left - imaging visit - value 0             | 5.50E-05 | 0.91 (0.47, 1.4)    | 0.00028 | 33548 19 0       | AU    |
| Mean L3 in posterior thalamic radiation on FA skeleton right - imaging visit - value 0            | 5.80E-05 | 0.9 (0.46, 1.3)     | 0.00028 | 33550 19 0       | AU    |
| Mean FA in posterior thalamic radiation on FA skeleton left - imaging visit - value 0             | 6.20E-05 | -0.9 (-1.3, -0.46)  | 0.00028 | 33550 19 0       | AU    |
| Mean MD in posterior thalamic radiation on FA skeleton right - imaging visit - value 0            | 6.40E-05 | 0.89 (0.46, 1.3)    | 0.00028 | 33550 19 0       | AU    |
| Mean ISOVF in posterior corona radiata on FA skeleton left - imaging visit - value 0              | 6.50E-05 | 0.9 (0.46, 1.3)     | 0.00028 | 33548 19 0       | AU    |
| Mean MD in retrolenticular part of internal capsule on FA skeleton left - imaging visit - value 0 | 6.50E-05 | 0.9 (0.46, 1.3)     | 0.00028 | 33550 19 0       | AU    |
| Mean ICVF in superior fronto occipital fasciculus on FA skeleton left - imaging visit - value 0   | 6.50E-05 | -0.89 (-1.3, -0.45) | 0.00028 | 33548 19 0       | AU    |
| Weighted mean FA in tract superior thalamic radiation right - imaging visit - value 0             | 6.90E-05 | -0.89 (-1.3, -0.45) | 0.00028 | 33548 19 0       | AU    |

| Phenotype                                                                                          | P value  | Beta (95% CI)       | AAF     | Cases (RR RA AA) | Units              |
|----------------------------------------------------------------------------------------------------|----------|---------------------|---------|------------------|--------------------|
| Mean MD in anterior corona radiata on FA skeleton right - imaging visit - value 0                  | 7.30E-05 | 0.88 (0.45, 1.3)    | 0.00028 | 33550 19 0       | AU                 |
| Weighted mean MD in tract inferior fronto occipital fasciculus right - imaging visit - value 0     | 7.50E-05 | 0.88 (0.45, 1.3)    | 0.00028 | 33548 19 0       | AU                 |
| Mean FA in posterior corona radiata on FA skeleton left - imaging visit - value 0                  | 7.60E-05 | -0.89 (-1.3, -0.45) | 0.00028 | 33550 19 0       | AU                 |
| Mean MD in tapetum on FA skeleton left - imaging visit - value 0                                   | 7.90E-05 | 0.89 (0.45, 1.3)    | 0.00028 | 33550 19 0       | AU                 |
| Weighted mean L3 in tract posterior thalamic radiation left - imaging visit - value 0              | 9.10E-05 | 0.88 (0.44, 1.3)    | 0.00028 | 33548 19 0       | AU                 |
| Weighted mean FA in tract posterior thalamic radiation left - imaging visit - value 0              | 9.20E-05 | -0.88 (-1.3, -0.44) | 0.00028 | 33548 19 0       | AU                 |
| Weighted mean L2 in tract superior longitudinal fasciculus right - imaging visit - value 0         | 9.30E-05 | 0.87 (0.43, 1.3)    | 0.00028 | 33548 19 0       | AU                 |
| Volume of grey matter in Thalamus right - imaging visit - value 0                                  | 9.80E-05 | 0.85 (0.42, 1.3)    | 0.00028 | 35591 20 0       | mm <sup>3</sup>    |
| Mean FA in posterior thalamic radiation on FA skeleton right - imaging visit - value 0             | 1.00E-04 | -0.87 (-1.3, -0.43) | 0.00028 | 33550 19 0       | AU                 |
| Weighted mean ICVF in tract superior thalamic radiation right - imaging visit - value 0            | 1.00E-04 | -0.86 (-1.3, -0.42) | 0.00028 | 33547 19 0       | AU                 |
| Mean MD in retrolenticular part of internal capsule on FA skeleton right - imaging visit - value 0 | 0.00011  | 0.87 (0.43, 1.3)    | 0.00028 | 33550 19 0       | AU                 |
| Weighted mean ICVF in tract corticospinal tract right - imaging visit - value 0                    | 0.00011  | -0.86 (-1.3, -0.42) | 0.00028 | 33547 19 0       | AU                 |
| 3mm index of best keratometry results right - initial visit - mean                                 | 0.00012  | -0.47 (-0.7, -0.23) | 0.00022 | 90674 40 0       | no_registered_unit |
| Mean L3 in sagittal stratum on FA skeleton right - imaging visit - value 0                         | 0.00012  | 0.86 (0.42, 1.3)    | 0.00028 | 33550 19 0       | AU                 |
| Mean MD in sagittal stratum on FA skeleton right - imaging visit - value 0                         | 0.00013  | 0.86 (0.42, 1.3)    | 0.00028 | 33550 19 0       | AU                 |
| Mean MD in body of corpus callosum on FA skeleton - imaging visit - value 0                        | 0.00013  | 0.85 (0.42, 1.3)    | 0.00028 | 33550 19 0       | AU                 |
| Volume of grey matter in Putamen right - imaging visit - value 0                                   | 0.00014  | 0.83 (0.4, 1.3)     | 0.00028 | 35591 20 0       | mm <sup>3</sup>    |
| Mean L2 in superior fronto occipital fasciculus on FA skeleton left - imaging visit - value 0      | 0.00014  | 0.86 (0.42, 1.3)    | 0.00028 | 33550 19 0       | AU                 |
| Mean L3 in tapetum on FA skeleton left - imaging visit - value 0                                   | 0.00015  | 0.86 (0.41, 1.3)    | 0.00028 | 33550 19 0       | AU                 |
| Mean ICVF in posterior corona radiata on FA skeleton left - imaging visit - value 0                | 0.00015  | -0.84 (-1.3, -0.41) | 0.00028 | 33548 19 0       | AU                 |
| Mean L3 in retrolenticular part of internal capsule on FA skeleton right - imaging visit - value 0 | 0.00015  | 0.85 (0.41, 1.3)    | 0.00028 | 33550 19 0       | AU                 |
| Weighted mean L1 in tract anterior thalamic radiation left - imaging visit - value 0               | 0.00016  | 0.85 (0.41, 1.3)    | 0.00028 | 33548 19 0       | AU                 |
| Weighted mean L3 in tract inferior fronto occipital fasciculus right - imaging visit - value 0     | 0.00016  | 0.84 (0.4, 1.3)     | 0.00028 | 33548 19 0       | AU                 |
| Mean L2 in retrolenticular part of internal capsule on FA skeleton right - imaging visit - value 0 | 0.00018  | 0.84 (0.4, 1.3)     | 0.00028 | 33550 19 0       | AU                 |
| Mean L3 in retrolenticular part of internal capsule on FA skeleton left - imaging visit - value 0  | 0.00018  | 0.84 (0.4, 1.3)     | 0.00028 | 33550 19 0       | AU                 |
| Weighted mean L2 in tract inferior fronto occipital fasciculus right - imaging visit - value 0     | 0.00019  | 0.83 (0.39, 1.3)    | 0.00028 | 33548 19 0       | AU                 |
| Mean ICVF in tapetum on FA skeleton right - imaging visit - value 0                                | 2.00E-04 | -0.84 (-1.3, -0.39) | 0.00028 | 33548 19 0       | AU                 |



| Phenotype                                                                                            | P value  | Beta (95% CI)        | AAF     | Cases (RR RA AA) | Units              |
|------------------------------------------------------------------------------------------------------|----------|----------------------|---------|------------------|--------------------|
| Weighted mean L2 in tract corticospinal tract left - imaging visit - value 0                         | 0.00021  | 0.84 (0.39, 1.3)     | 0.00028 | 33548 19 0       | AU                 |
| Weighted mean ICVF in tract posterior thalamic radiation left - imaging visit - value 0              | 0.00025  | -0.81 (-1.2, -0.38)  | 0.00028 | 33547 19 0       | AU                 |
| Mean ISOVF in retrolenticular part of internal capsule on FA skeleton left - imaging visit - value 0 | 0.00026  | 0.83 (0.38, 1.3)     | 0.00028 | 33548 19 0       | AU                 |
| Weighted mean L2 in tract inferior fronto occipital fasciculus left - imaging visit - value 0        | 0.00027  | 0.81 (0.38, 1.2)     | 0.00028 | 33548 19 0       | AU                 |
| Volume of grey matter in Thalamus left - imaging visit - value 0                                     | 0.00027  | 0.8 (0.37, 1.2)      | 0.00028 | 35591 20 0       | mm <sup>3</sup>    |
| Weighted mean FA in tract corticospinal tract left - imaging visit - value 0                         | 0.00029  | -0.82 (-1.3, -0.38)  | 0.00028 | 33548 19 0       | AU                 |
| Mean L2 in sagittal stratum on FA skeleton right - imaging visit - value 0                           | 3.00E-04 | 0.81 (0.37, 1.3)     | 0.00028 | 33550 19 0       | AU                 |
| 3mm index of best keratometry results right - mean of all visits                                     | 3.00E-04 | -0.42 (-0.65, -0.19) | 0.00021 | 103404 44 0      | no_registered_unit |
| Mean L2 in anterior corona radiata on FA skeleton right - imaging visit - value 0                    | 0.00031  | 0.8 (0.37, 1.2)      | 0.00028 | 33550 19 0       | AU                 |
| Mean L2 in superior longitudinal fasciculus on FA skeleton right - imaging visit - value 0           | 0.00032  | 0.81 (0.37, 1.2)     | 0.00028 | 33550 19 0       | AU                 |
| Mean ICVF in superior fronto occipital fasciculus on FA skeleton right - imaging visit - value 0     | 0.00036  | -0.8 (-1.2, -0.36)   | 0.00028 | 33548 19 0       | AU                 |
| Weighted mean L1 in tract inferior fronto occipital fasciculus right - imaging visit - value 0       | 0.00038  | 0.8 (0.36, 1.2)      | 0.00028 | 33548 19 0       | AU                 |
| Mean MD in superior longitudinal fasciculus on FA skeleton left - imaging visit - value 0            | 0.00039  | 0.79 (0.35, 1.2)     | 0.00028 | 33550 19 0       | AU                 |
| Weighted mean MD in tract inferior fronto occipital fasciculus left - imaging visit - value 0        | 4.00E-04 | 0.79 (0.35, 1.2)     | 0.00028 | 33548 19 0       | AU                 |
| Weighted mean ICVF in tract anterior thalamic radiation right - imaging visit - value 0              | 0.00041  | -0.78 (-1.2, -0.35)  | 0.00028 | 33547 19 0       | AU                 |
| Mean FA in sagittal stratum on FA skeleton right - imaging visit - value 0                           | 0.00045  | -0.79 (-1.2, -0.35)  | 0.00028 | 33550 19 0       | AU                 |
| Mean FA in retrolenticular part of internal capsule on FA skeleton left - imaging visit - value 0    | 0.00046  | -0.79 (-1.2, -0.35)  | 0.00028 | 33550 19 0       | AU                 |
| Mean L3 in body of corpus callosum on FA skeleton - imaging visit - value 0                          | 0.00047  | 0.78 (0.34, 1.2)     | 0.00028 | 33550 19 0       | AU                 |
| Mean ICVF in posterior thalamic radiation on FA skeleton left - imaging visit - value 0              | 0.00047  | -0.77 (-1.2, -0.34)  | 0.00028 | 33548 19 0       | AU                 |
| Mean L1 in tapetum on FA skeleton left - imaging visit - value 0                                     | 0.00053  | 0.78 (0.34, 1.2)     | 0.00028 | 33550 19 0       | AU                 |
| Mean ICVF in anterior limb of internal capsule on FA skeleton right - imaging visit - value 0        | 0.00054  | -0.77 (-1.2, -0.33)  | 0.00028 | 33548 19 0       | AU                 |
| Weighted mean MD in tract superior longitudinal fasciculus right - imaging visit - value 0           | 6.00E-04 | 0.76 (0.33, 1.2)     | 0.00028 | 33548 19 0       | AU                 |
| Mean FA in anterior corona radiata on FA skeleton right - imaging visit - value 0                    | 0.00064  | -0.76 (-1.2, -0.32)  | 0.00028 | 33550 19 0       | AU                 |
| Mean MD in anterior corona radiata on FA skeleton left - imaging visit - value 0                     | 0.00064  | 0.76 (0.32, 1.2)     | 0.00028 | 33550 19 0       | AU                 |
| Weighted mean FA in tract medial lemniscus right - imaging visit - value 0                           | 7.00E-04 | -0.77 (-1.2, -0.32)  | 0.00028 | 33548 19 0       | AU                 |
| Mean L2 in posterior limb of internal capsule on FA skeleton right - imaging visit - value 0         | 0.00072  | 0.76 (0.32, 1.2)     | 0.00028 | 33550 19 0       | AU                 |
| Mean ICVF in anterior limb of internal capsule on FA skeleton left - imaging visit - value 0         | 0.00072  | -0.75 (-1.2, -0.32)  | 0.00028 | 33548 19 0       | AU                 |

| Phenotype                                                                                          | P value  | Beta (95% CI)       | AAF     | Cases (RR RA AA) | Units           |
|----------------------------------------------------------------------------------------------------|----------|---------------------|---------|------------------|-----------------|
| Mean FA in retrolenticular part of internal capsule on FA skeleton right - imaging visit - value 0 | 0.00076  | -0.76 (-1.2, -0.32) | 0.00028 | 33550 19 0       | AU              |
| Mean ISOVF in anterior limb of internal capsule on FA skeleton left - imaging visit - value 0      | 0.00077  | 0.76 (0.32, 1.2)    | 0.00028 | 33548 19 0       | AU              |
| Mean ICVF in tapetum on FA skeleton left - imaging visit - value 0                                 | 8.00E-04 | -0.76 (-1.2, -0.32) | 0.00028 | 33548 19 0       | AU              |
| Mean ISOVF in body of corpus callosum on FA skeleton - imaging visit - value 0                     | 8.00E-04 | 0.76 (0.31, 1.2)    | 0.00028 | 33548 19 0       | AU              |
| Mean intensity of Thalamus Proper right hemisphere - imaging visit - value 0                       | 0.00082  | -0.72 (-1.1, -0.3)  | 0.00029 | 35920 21 0       | AU              |
| Mean L3 in anterior corona radiata on FA skeleton left - imaging visit - value 0                   | 0.00082  | 0.74 (0.31, 1.2)    | 0.00028 | 33550 19 0       | AU              |
| Volume of hippocampal fissure right hemisphere - imaging visit - value 0                           | 0.00082  | 0.72 (0.3, 1.1)     | 0.00029 | 35921 21 0       | mm <sup>3</sup> |
| Weighted mean ICVF in tract anterior thalamic radiation left - imaging visit - value 0             | 0.00082  | -0.74 (-1.2, -0.31) | 0.00028 | 33547 19 0       | AU              |
| Weighted mean L2 in tract inferior longitudinal fasciculus left - imaging visit - value 0          | 0.00085  | 0.74 (0.31, 1.2)    | 0.00028 | 33548 19 0       | AU              |
| Weighted mean MD in tract posterior thalamic radiation right - imaging visit - value 0             | 0.00086  | 0.75 (0.31, 1.2)    | 0.00028 | 33548 19 0       | AU              |
| Volume of Putamen left hemisphere - imaging visit - value 0                                        | 0.00087  | 0.71 (0.29, 1.1)    | 0.00029 | 35921 21 0       | mm <sup>3</sup> |
| Weighted mean MD in tract inferior longitudinal fasciculus left - imaging visit - value 0          | 0.00091  | 0.74 (0.3, 1.2)     | 0.00028 | 33548 19 0       | AU              |
| Mean L2 in tapetum on FA skeleton left - imaging visit - value 0                                   | 0.00093  | 0.75 (0.31, 1.2)    | 0.00028 | 33550 19 0       | AU              |
| Weighted mean L3 in tract posterior thalamic radiation right - imaging visit - value 0             | 0.00094  | 0.75 (0.3, 1.2)     | 0.00028 | 33548 19 0       | AU              |
| Mean L1 in anterior corona radiata on FA skeleton left - imaging visit - value 0                   | 0.00099  | 0.74 (0.3, 1.2)     | 0.00028 | 33550 19 0       | AU              |
| Mean MD in superior longitudinal fasciculus on FA skeleton right - imaging visit - value 0         | 0.001    | 0.73 (0.29, 1.2)    | 0.00028 | 33550 19 0       | AU              |
| Weighted mean L3 in tract superior longitudinal fasciculus right - imaging visit - value 0         | 0.0011   | 0.73 (0.29, 1.2)    | 0.00028 | 33548 19 0       | AU              |
| Mean L1 in anterior limb of internal capsule on FA skeleton right - imaging visit - value 0        | 0.0012   | 0.73 (0.29, 1.2)    | 0.00028 | 33550 19 0       | AU              |
| Mean ICVF in posterior thalamic radiation on FA skeleton right - imaging visit - value 0           | 0.0012   | -0.71 (-1.1, -0.28) | 0.00028 | 33548 19 0       | AU              |
| Mean ISOVF in superior fronto occipital fasciculus on FA skeleton left - imaging visit - value 0   | 0.0012   | 0.74 (0.29, 1.2)    | 0.00028 | 33548 19 0       | AU              |
| Mean L1 in superior fronto occipital fasciculus on FA skeleton right - imaging visit - value 0     | 0.0013   | 0.73 (0.29, 1.2)    | 0.00028 | 33550 19 0       | AU              |
| Mean OD in middle cerebellar peduncle on FA skeleton - imaging visit - value 0                     | 0.0013   | 0.73 (0.29, 1.2)    | 0.00028 | 33548 19 0       | AU              |
| Weighted mean L2 in tract uncinate fasciculus left - imaging visit - value 0                       | 0.0013   | 0.72 (0.28, 1.2)    | 0.00028 | 33548 19 0       | AU              |
| Mean FA in superior fronto occipital fasciculus on FA skeleton right - imaging visit - value 0     | 0.0014   | -0.72 (-1.2, -0.28) | 0.00028 | 33550 19 0       | AU              |
| Mean ICVF in anterior corona radiata on FA skeleton right - imaging visit - value 0                | 0.0014   | -0.7 (-1.1, -0.27)  | 0.00028 | 33548 19 0       | AU              |
| Mean ICVF in uncinate fasciculus on FA skeleton right - imaging visit - value 0                    | 0.0014   | -0.71 (-1.2, -0.28) | 0.00028 | 33548 19 0       | AU              |
| Volume of Putamen right hemisphere - imaging visit - value 0                                       | 0.0014   | 0.68 (0.26, 1.1)    | 0.00029 | 35921 21 0       | mm <sup>3</sup> |

| Phenotype                                                                                             | P value | Beta (95% CI)         | AAF     | Cases (RR RA AA) | Units           |
|-------------------------------------------------------------------------------------------------------|---------|-----------------------|---------|------------------|-----------------|
| Mean L1 in posterior limb of internal capsule on FA skeleton right - imaging visit - value 0          | 0.0014  | 0.71 (0.28, 1.2)      | 0.00028 | 33550 19 0       | AU              |
| Mean L2 in superior longitudinal fasciculus on FA skeleton left - imaging visit - value 0             | 0.0015  | 0.71 (0.27, 1.2)      | 0.00028 | 33550 19 0       | AU              |
| Mean ISOVF in posterior limb of internal capsule on FA skeleton left - imaging visit - value 0        | 0.0015  | 0.72 (0.28, 1.2)      | 0.00028 | 33548 19 0       | AU              |
| Mean ICVF in sagittal stratum on FA skeleton right - imaging visit - value 0                          | 0.0015  | -0.7 (-1.1, -0.27)    | 0.00028 | 33548 19 0       | AU              |
| Weighted mean ICVF in tract corticospinal tract left - imaging visit - value 0                        | 0.0015  | -0.7 (-1.1, -0.27)    | 0.00028 | 33547 19 0       | AU              |
| Weighted mean L2 in tract superior longitudinal fasciculus left - imaging visit - value 0             | 0.0015  | 0.71 (0.27, 1.1)      | 0.00028 | 33548 19 0       | AU              |
| Weighted mean ICVF in tract posterior thalamic radiation right - imaging visit - value 0              | 0.0016  | -0.7 (-1.1, -0.27)    | 0.00028 | 33547 19 0       | AU              |
| Weighted mean L3 in tract inferior fronto occipital fasciculus left - imaging visit - value 0         | 0.0016  | 0.7 (0.27, 1.1)       | 0.00028 | 33548 19 0       | AU              |
| Mean L3 in uncinate fasciculus on FA skeleton right - imaging visit - value 0                         | 0.0017  | 0.71 (0.27, 1.2)      | 0.00028 | 33550 19 0       | AU              |
| Mean L2 in body of corpus callosum on FA skeleton - imaging visit - value 0                           | 0.0018  | 0.7 (0.26, 1.1)       | 0.00028 | 33550 19 0       | AU              |
| Volume of PuA left hemisphere - imaging visit - value 0                                               | 0.0018  | 0.67 (0.25, 1.1)      | 0.00029 | 35921 21 0       | mm <sup>3</sup> |
| Grey white contrast in lingual left hemisphere - imaging visit - value 0                              | 0.0018  | 0.66 (0.24, 1.1)      | 0.00029 | 35921 21 0       | AU              |
| Volume of CL right hemisphere - imaging visit - value 0                                               | 0.002   | 0.67 (0.24, 1.1)      | 0.00029 | 35921 21 0       | mm <sup>3</sup> |
| Mean ISOVF in retrolenticular part of internal capsule on FA skeleton right - imaging visit - value 0 | 0.002   | 0.7 (0.26, 1.1)       | 0.00028 | 33548 19 0       | AU              |
| Area of S collat transv post left hemisphere - imaging visit - value 0                                | 0.002   | 0.67 (0.25, 1.1)      | 0.00029 | 35921 21 0       | mm <sup>2</sup> |
| Weighted mean FA in tract superior longitudinal fasciculus right - imaging visit - value 0            | 0.002   | -0.69 (-1.1, -0.25)   | 0.00028 | 33548 19 0       | AU              |
| Mean MD in fornix cres stria terminalis on FA skeleton left - imaging visit - value 0                 | 0.0021  | 0.7 (0.25, 1.1)       | 0.00028 | 33550 19 0       | AU              |
| Weighted mean L1 in tract posterior thalamic radiation left - imaging visit - value 0                 | 0.0021  | 0.7 (0.25, 1.1)       | 0.00028 | 33548 19 0       | AU              |
| Weighted mean L2 in tract inferior longitudinal fasciculus right - imaging visit - value 0            | 0.0021  | 0.68 (0.25, 1.1)      | 0.00028 | 33548 19 0       | AU              |
| Weighted mean L3 in tract inferior longitudinal fasciculus left - imaging visit - value 0             | 0.0023  | 0.68 (0.24, 1.1)      | 0.00028 | 33548 19 0       | AU              |
| Mean L1 in anterior corona radiata on FA skeleton right - imaging visit - value 0                     | 0.0023  | 0.68 (0.24, 1.1)      | 0.00028 | 33550 19 0       | AU              |
| Weighted mean L2 in tract posterior thalamic radiation right - imaging visit - value 0                | 0.0023  | 0.69 (0.24, 1.1)      | 0.00028 | 33548 19 0       | AU              |
| Weighted mean ICVF in tract inferior fronto occipital fasciculus right - imaging visit - value 0      | 0.0023  | -0.67 (-1.1, -0.24)   | 0.00028 | 33547 19 0       | AU              |
| Mean MO in middle cerebellar peduncle on FA skeleton - imaging visit - value 0                        | 0.0024  | -0.68 (-1.1, -0.24)   | 0.00028 | 33550 19 0       | AU              |
| Mean thickness of BA4p left hemisphere - imaging visit - value 0                                      | 0.0024  | -0.65 (-1.1, -0.23)   | 0.00029 | 35921 21 0       | mm              |
| Mean L3 in superior longitudinal fasciculus on FA skeleton right - imaging visit - value 0            | 0.0025  | 0.67 (0.24, 1.1)      | 0.00028 | 33550 19 0       | AU              |
| Mean corpuscular volume - mean of all visits                                                          | 0.0025  | -0.21 (-0.34, -0.073) | 0.0002  | 418705 167 0     | femtolitres     |

| Phenotype                                                                                         | P value | Beta (95% CI)        | AAF     | Cases (RR RA AA) | Units           |
|---------------------------------------------------------------------------------------------------|---------|----------------------|---------|------------------|-----------------|
| Weighted mean FA in tract inferior longitudinal fasciculus right - imaging visit - value 0        | 0.0025  | -0.67 (-1.1, -0.24)  | 0.00028 | 33548 19 0       | AU              |
| Mean FA in middle cerebellar peduncle on FA skeleton - imaging visit - value 0                    | 0.0025  | -0.68 (-1.1, -0.24)  | 0.00028 | 33550 19 0       | AU              |
| Weighted mean L3 in tract inferior longitudinal fasciculus right - imaging visit - value 0        | 0.0026  | 0.67 (0.23, 1.1)     | 0.00028 | 33548 19 0       | AU              |
| Mean L2 in genu of corpus callosum on FA skeleton - imaging visit - value 0                       | 0.0026  | 0.68 (0.24, 1.1)     | 0.00028 | 33550 19 0       | AU              |
| Mean FA in posterior limb of internal capsule on FA skeleton right - imaging visit - value 0      | 0.0027  | -0.67 (-1.1, -0.23)  | 0.00028 | 33550 19 0       | AU              |
| Volume of CL left hemisphere - imaging visit - value 0                                            | 0.0028  | 0.64 (0.22, 1.1)     | 0.00029 | 35921 21 0       | mm <sup>3</sup> |
| Area of Pole temporal left hemisphere - imaging visit - value 0                                   | 0.0028  | 0.64 (0.22, 1.1)     | 0.00029 | 35921 21 0       | mm <sup>2</sup> |
| Weighted mean FA in tract inferior fronto occipital fasciculus right - imaging visit - value 0    | 0.0029  | -0.67 (-1.1, -0.23)  | 0.00028 | 33548 19 0       | AU              |
| Weighted mean MD in tract inferior longitudinal fasciculus right - imaging visit - value 0        | 0.0029  | 0.66 (0.23, 1.1)     | 0.00028 | 33548 19 0       | AU              |
| Mean FA in superior fronto occipital fasciculus on FA skeleton left - imaging visit - value 0     | 0.0029  | -0.67 (-1.1, -0.23)  | 0.00028 | 33550 19 0       | AU              |
| Frequency of travelling from home to job workplace - initial visit - mean                         | 0.003   | 0.26 (0.087, 0.42)   | 0.00021 | 240690 100 0     | times           |
| Weighted mean L1 in tract inferior longitudinal fasciculus left - imaging visit - value 0         | 0.003   | 0.67 (0.23, 1.1)     | 0.00028 | 33548 19 0       | AU              |
| Mean thickness of insula left hemisphere - imaging visit - value 0                                | 0.0031  | -0.64 (-1.1, -0.22)  | 0.00029 | 35921 21 0       | mm              |
| Weighted mean MD in tract superior longitudinal fasciculus left - imaging visit - value 0         | 0.0032  | 0.65 (0.22, 1.1)     | 0.00028 | 33548 19 0       | AU              |
| Volume of Lateral nucleus right hemisphere - imaging visit - value 0                              | 0.0032  | 0.63 (0.21, 1.1)     | 0.00029 | 35921 21 0       | mm <sup>3</sup> |
| Mean ISOVF in superior fronto occipital fasciculus on FA skeleton right - imaging visit - value 0 | 0.0032  | 0.67 (0.22, 1.1)     | 0.00028 | 33548 19 0       | AU              |
| Mean ISOVF in tapetum on FA skeleton left - imaging visit - value 0                               | 0.0033  | 0.67 (0.22, 1.1)     | 0.00028 | 33548 19 0       | AU              |
| Volume of AV left hemisphere - imaging visit - value 0                                            | 0.0033  | 0.63 (0.21, 1)       | 0.00029 | 35921 21 0       | mm <sup>3</sup> |
| Mean ICVF in superior longitudinal fasciculus on FA skeleton left - imaging visit - value 0       | 0.0033  | -0.65 (-1.1, -0.21)  | 0.00028 | 33548 19 0       | AU              |
| Volume of SubCortGray whole brain - imaging visit - value 0                                       | 0.0035  | 0.62 (0.21, 1)       | 0.00029 | 35921 21 0       | mm <sup>3</sup> |
| Mean L2 in anterior corona radiata on FA skeleton left - imaging visit - value 0                  | 0.0035  | 0.65 (0.22, 1.1)     | 0.00028 | 33550 19 0       | AU              |
| Volume of MV Re right hemisphere - imaging visit - value 0                                        | 0.0035  | 0.63 (0.21, 1.1)     | 0.00029 | 35921 21 0       | mm <sup>3</sup> |
| Mean corpuscular volume - initial visit - mean                                                    | 0.0036  | -0.2 (-0.33, -0.065) | 0.0002  | 418058 167 0     | femtolitres     |
| Mean FA in superior corona radiata on FA skeleton left - imaging visit - value 0                  | 0.0036  | -0.66 (-1.1, -0.21)  | 0.00028 | 33550 19 0       | AU              |
| Weighted mean ISOVF in tract corticospinal tract left - imaging visit - value 0                   | 0.0037  | 0.66 (0.21, 1.1)     | 0.00028 | 33547 19 0       | AU              |
| Volume of Whole amygdala right hemisphere - imaging visit - value 0                               | 0.0037  | 0.62 (0.2, 1)        | 0.00029 | 35921 21 0       | mm <sup>3</sup> |
| Volume of Caudate right hemisphere - imaging visit - value 0                                      | 0.0038  | 0.61 (0.2, 1)        | 0.00029 | 35921 21 0       | mm <sup>3</sup> |

| Phenotype                                                                                       | P value | Beta (95% CI)         | AAF      | Cases (RR RA AA) | Units              |
|-------------------------------------------------------------------------------------------------|---------|-----------------------|----------|------------------|--------------------|
| Mean FA in genu of corpus callosum on FA skeleton - imaging visit - value 0                     | 0.0038  | -0.65 (-1.1, -0.21)   | 0.00028  | 33550 19 0       | AU                 |
| Mean L3 in genu of corpus callosum on FA skeleton - imaging visit - value 0                     | 0.0039  | 0.64 (0.21, 1.1)      | 0.00028  | 33550 19 0       | AU                 |
| Mean FA in superior longitudinal fasciculus on FA skeleton right - imaging visit - value 0      | 0.0039  | -0.64 (-1.1, -0.21)   | 0.00028  | 33550 19 0       | AU                 |
| Mean FA in inferior cerebellar peduncle on FA skeleton left - imaging visit - value 0           | 0.0039  | -0.65 (-1.1, -0.21)   | 0.00028  | 33550 19 0       | AU                 |
| Weighted mean L1 in tract acoustic radiation right - imaging visit - value 0                    | 0.0041  | 0.65 (0.21, 1.1)      | 0.00028  | 33548 19 0       | AU                 |
| Mean L3 in superior longitudinal fasciculus on FA skeleton left - imaging visit - value 0       | 0.0043  | 0.63 (0.2, 1.1)       | 0.00028  | 33550 19 0       | AU                 |
| Weighted mean ISOVF in tract anterior thalamic radiation right - imaging visit - value 0        | 0.0043  | 0.65 (0.2, 1.1)       | 0.00028  | 33547 19 0       | AU                 |
| Mean ICVF in posterior limb of internal capsule on FA skeleton right - imaging visit - value 0  | 0.0043  | -0.63 (-1.1, -0.2)    | 0.00028  | 33548 19 0       | AU                 |
| Mean MD in genu of corpus callosum on FA skeleton - imaging visit - value 0                     | 0.0044  | 0.64 (0.2, 1.1)       | 0.00028  | 33550 19 0       | AU                 |
| Weighted mean ISOVF in tract corticospinal tract right - imaging visit - value 0                | 0.0045  | 0.64 (0.2, 1.1)       | 0.00028  | 33547 19 0       | AU                 |
| Mean L1 in body of corpus callosum on FA skeleton - imaging visit - value 0                     | 0.0046  | 0.64 (0.2, 1.1)       | 0.00028  | 33550 19 0       | AU                 |
| Weighted mean L1 in tract inferior fronto occipital fasciculus left - imaging visit - value 0   | 0.0046  | 0.64 (0.2, 1.1)       | 0.00028  | 33548 19 0       | AU                 |
| Weighted mean MD in tract uncinata fasciculus left - imaging visit - value 0                    | 0.0046  | 0.64 (0.2, 1.1)       | 0.00028  | 33548 19 0       | AU                 |
| Weighted mean ICVF in tract inferior fronto occipital fasciculus left - imaging visit - value 0 | 0.0047  | -0.62 (-1.1, -0.19)   | 0.00028  | 33547 19 0       | AU                 |
| Mean corpuscular haemoglobin - initial visit - mean                                             | 0.0048  | -0.19 (-0.33, -0.059) | 2.00E-04 | 418057 167 0     | picograms          |
| Mean FA in superior corona radiata on FA skeleton right - imaging visit - value 0               | 0.0049  | -0.63 (-1.1, -0.19)   | 0.00028  | 33550 19 0       | AU                 |
| Acceptability of each blow result - initial visit - mean                                        | 0.0049  | 0.2 (0.059, 0.33)     | 0.00021  | 392413 161 0     | no_registered_unit |
| Weighted mean ISOVF in tract superior longitudinal fasciculus right - imaging visit - value 0   | 0.0049  | 0.63 (0.19, 1.1)      | 0.00028  | 33547 19 0       | AU                 |
| Mean L3 in tapetum on FA skeleton right - imaging visit - value 0                               | 0.0049  | 0.63 (0.19, 1.1)      | 0.00028  | 33550 19 0       | AU                 |
| Area of G S cingul Mid Post right hemisphere - imaging visit - value 0                          | 0.005   | 0.61 (0.18, 1)        | 0.00029  | 35921 21 0       | mm <sup>2</sup>    |
| Mean corpuscular haemoglobin - mean of all visits                                               | 0.0051  | -0.19 (-0.33, -0.057) | 2.00E-04 | 418702 167 0     | picograms          |
| Weighted mean MD in tract acoustic radiation right - imaging visit - value 0                    | 0.0053  | 0.64 (0.19, 1.1)      | 0.00028  | 33548 19 0       | AU                 |
| Mean OD in posterior corona radiata on FA skeleton right - imaging visit - value 0              | 0.0054  | -0.62 (-1.1, -0.18)   | 0.00028  | 33548 19 0       | AU                 |
| Mean intensity of Thalamus Proper left hemisphere - imaging visit - value 0                     | 0.0054  | -0.6 (-1, -0.18)      | 0.00029  | 35920 21 0       | AU                 |
| Weighted mean FA in tract posterior thalamic radiation right - imaging visit - value 0          | 0.0054  | -0.63 (-1.1, -0.18)   | 0.00028  | 33548 19 0       | AU                 |
| Volume of CeM right hemisphere - imaging visit - value 0                                        | 0.0056  | 0.59 (0.17, 1)        | 0.00029  | 35921 21 0       | mm <sup>3</sup>    |
| Mean FA in medial lemniscus on FA skeleton left - imaging visit - value 0                       | 0.0059  | -0.62 (-1.1, -0.18)   | 0.00028  | 33550 19 0       | AU                 |

| Phenotype                                                                                     | P value | Beta (95% CI)         | AAF      | Cases<br>(RR RA AA) | Units              |
|-----------------------------------------------------------------------------------------------|---------|-----------------------|----------|---------------------|--------------------|
| Mean L1 in posterior limb of internal capsule on FA skeleton left - imaging visit - value 0   | 0.0059  | 0.62 (0.18, 1.1)      | 0.00028  | 33550 19 0          | AU                 |
| Mean thickness of G parietal sup right hemisphere - imaging visit - value 0                   | 0.006   | 0.59 (0.17, 1)        | 0.00029  | 35921 21 0          | mm                 |
| Acceptability of each blow result - mean of all visits                                        | 0.0062  | 0.19 (0.054, 0.33)    | 2.00E-04 | 394984 162 0        | no_registered_unit |
| Weighted mean FA in tract inferior longitudinal fasciculus left - imaging visit - value 0     | 0.0062  | -0.61 (-1, -0.17)     | 0.00028  | 33548 19 0          | AU                 |
| Weighted mean L3 in tract superior longitudinal fasciculus left - imaging visit - value 0     | 0.0063  | 0.61 (0.17, 1)        | 0.00028  | 33548 19 0          | AU                 |
| Volume of hippocampal fissure left hemisphere - imaging visit - value 0                       | 0.0064  | 0.59 (0.17, 1)        | 0.00029  | 35921 21 0          | mm <sup>3</sup>    |
| Weighted mean L3 in tract uncinate fasciculus left - imaging visit - value 0                  | 0.0064  | 0.61 (0.17, 1.1)      | 0.00028  | 33548 19 0          | AU                 |
| Mean OD in superior corona radiata on FA skeleton left - imaging visit - value 0              | 0.0066  | -0.61 (-1.1, -0.17)   | 0.00028  | 33548 19 0          | AU                 |
| Mean ICVF in superior longitudinal fasciculus on FA skeleton right - imaging visit - value 0  | 0.0066  | -0.6 (-1, -0.17)      | 0.00028  | 33548 19 0          | AU                 |
| Weighted mean FA in tract forceps major - imaging visit - value 0                             | 0.0068  | -0.61 (-1.1, -0.17)   | 0.00028  | 33548 19 0          | AU                 |
| Mean L2 in fornix cres stria terminalis on FA skeleton left - imaging visit - value 0         | 0.0068  | 0.61 (0.17, 1.1)      | 0.00028  | 33550 19 0          | AU                 |
| Mean L3 in inferior cerebellar peduncle on FA skeleton left - imaging visit - value 0         | 0.0069  | 0.61 (0.17, 1.1)      | 0.00028  | 33550 19 0          | AU                 |
| Weighted mean FA in tract inferior fronto occipital fasciculus left - imaging visit - value 0 | 0.0071  | -0.6 (-1, -0.16)      | 0.00028  | 33548 19 0          | AU                 |
| Mean OD in superior corona radiata on FA skeleton right - imaging visit - value 0             | 0.0072  | -0.6 (-1, -0.16)      | 0.00028  | 33548 19 0          | AU                 |
| Mean MD in tapetum on FA skeleton right - imaging visit - value 0                             | 0.0074  | 0.6 (0.16, 1)         | 0.00028  | 33550 19 0          | AU                 |
| Weighted mean ICVF in tract inferior longitudinal fasciculus left - imaging visit - value 0   | 0.0074  | -0.59 (-1, -0.16)     | 0.00028  | 33547 19 0          | AU                 |
| Volume of BA4p left hemisphere - imaging visit - value 0                                      | 0.0076  | -0.58 (-1, -0.15)     | 0.00029  | 35921 21 0          | mm <sup>3</sup>    |
| Mean ICVF in anterior corona radiata on FA skeleton left - imaging visit - value 0            | 0.0076  | -0.59 (-1, -0.16)     | 0.00028  | 33548 19 0          | AU                 |
| Volume of MD1 right hemisphere - imaging visit - value 0                                      | 0.0078  | 0.57 (0.15, 1)        | 0.00029  | 35921 21 0          | mm <sup>3</sup>    |
| Mean thickness of insula left hemisphere - imaging visit - value 0                            | 0.0078  | -0.58 (-1, -0.15)     | 0.00029  | 35921 21 0          | mm                 |
| Weighted mean MO in tract anterior thalamic radiation right - imaging visit - value 0         | 0.0078  | 0.6 (0.16, 1)         | 0.00028  | 33548 19 0          | AU                 |
| OS Contour 1 to 2 Region T6 Mean                                                              | 0.008   | -0.65 (-1.1, -0.17)   | 0.00016  | 46458 15 0          | NA                 |
| Fathers age at death - initial visit - mean                                                   | 0.0081  | -0.23 (-0.39, -0.059) | 2.00E-04 | 317217 129 0        | years              |
| Mean L2 in sagittal stratum on FA skeleton left - imaging visit - value 0                     | 0.0083  | 0.59 (0.15, 1)        | 0.00028  | 33550 19 0          | AU                 |
| Weighted mean FA in tract superior longitudinal fasciculus left - imaging visit - value 0     | 0.0083  | -0.59 (-1, -0.15)     | 0.00028  | 33548 19 0          | AU                 |
| Volume of Caudate left hemisphere - imaging visit - value 0                                   | 0.0086  | 0.55 (0.14, 0.97)     | 0.00029  | 35921 21 0          | mm <sup>3</sup>    |
| Mean FA in tapetum on FA skeleton right - imaging visit - value 0                             | 0.0086  | -0.59 (-1, -0.15)     | 0.00028  | 33550 19 0          | AU                 |

| Phenotype                                                                                    | P value | Beta (95% CI)        | AAF     | Cases (RR RA AA) | Units           |
|----------------------------------------------------------------------------------------------|---------|----------------------|---------|------------------|-----------------|
| Area of posteriorcingulate right hemisphere - imaging visit - value 0                        | 0.0088  | 0.57 (0.14, 0.99)    | 0.00029 | 35921 21 0       | mm <sup>2</sup> |
| Volume of BA3a left hemisphere - imaging visit - value 0                                     | 0.0089  | -0.57 (-0.99, -0.14) | 0.00029 | 35921 21 0       | mm <sup>3</sup> |
| Mean L1 in posterior thalamic radiation on FA skeleton left - imaging visit - value 0        | 0.0089  | 0.59 (0.15, 1)       | 0.00028 | 33550 19 0       | AU              |
| Mean L2 in tapetum on FA skeleton right - imaging visit - value 0                            | 0.009   | 0.59 (0.15, 1)       | 0.00028 | 33550 19 0       | AU              |
| Weighted mean ICVF in tract superior longitudinal fasciculus right - imaging visit - value 0 | 0.0092  | -0.57 (-1, -0.14)    | 0.00028 | 33547 19 0       | AU              |
| Area of S cingul Marginalis right hemisphere - imaging visit - value 0                       | 0.0092  | 0.56 (0.14, 0.99)    | 0.00029 | 35921 21 0       | mm <sup>2</sup> |
| Frequency of travelling from home to job workplace - mean of all visits                      | 0.0094  | 0.22 (0.055, 0.39)   | 0.00021 | 241873 101 0     | times           |
| Mean FA in sagittal stratum on FA skeleton left - imaging visit - value 0                    | 0.0095  | -0.58 (-1, -0.14)    | 0.00028 | 33550 19 0       | AU              |
| Volume of Pole temporal left hemisphere - imaging visit - value 0                            | 0.0095  | 0.56 (0.14, 0.99)    | 0.00029 | 35921 21 0       | mm <sup>3</sup> |
| Volume of PuA right hemisphere - imaging visit - value 0                                     | 0.0099  | 0.56 (0.13, 0.98)    | 0.00029 | 35921 21 0       | mm <sup>3</sup> |
| Weighted mean L1 in tract superior longitudinal fasciculus right - imaging visit - value 0   | 0.01    | 0.57 (0.14, 1)       | 0.00028 | 33548 19 0       | AU              |
| Mean FA in body of corpus callosum on FA skeleton - imaging visit - value 0                  | 0.01    | -0.57 (-1, -0.14)    | 0.00028 | 33550 19 0       | AU              |
| Mean thickness of Pole occipital right hemisphere - imaging visit - value 0                  | 0.01    | 0.55 (0.13, 0.98)    | 0.00029 | 35921 21 0       | mm              |
| Mean MD in sagittal stratum on FA skeleton left - imaging visit - value 0                    | 0.01    | 0.57 (0.13, 1)       | 0.00028 | 33550 19 0       | AU              |
| Mean intensity of Putamen left hemisphere - imaging visit - value 0                          | 0.01    | -0.55 (-0.96, -0.13) | 0.00029 | 35921 21 0       | AU              |
| Mean FA in anterior corona radiata on FA skeleton left - imaging visit - value 0             | 0.01    | -0.57 (-1, -0.13)    | 0.00028 | 33550 19 0       | AU              |
| Mean L3 in sagittal stratum on FA skeleton left - imaging visit - value 0                    | 0.01    | 0.57 (0.13, 1)       | 0.00028 | 33550 19 0       | AU              |
| Mean L2 in uncinate fasciculus on FA skeleton left - imaging visit - value 0                 | 0.011   | 0.58 (0.14, 1)       | 0.00028 | 33550 19 0       | AU              |
| Volume of Basal nucleus right hemisphere - imaging visit - value 0                           | 0.011   | 0.55 (0.13, 0.97)    | 0.00029 | 35921 21 0       | mm <sup>3</sup> |
| Volume of Accessory Basal nucleus right hemisphere - imaging visit - value 0                 | 0.011   | 0.55 (0.13, 0.97)    | 0.00029 | 35921 21 0       | mm <sup>3</sup> |
| Mean FA in uncinate fasciculus on FA skeleton right - imaging visit - value 0                | 0.011   | -0.57 (-1, -0.13)    | 0.00028 | 33550 19 0       | AU              |
| Mean ICVF in uncinate fasciculus on FA skeleton left - imaging visit - value 0               | 0.011   | -0.57 (-1, -0.13)    | 0.00028 | 33548 19 0       | AU              |
| Mean L3 in fornix cres stria terminalis on FA skeleton left - imaging visit - value 0        | 0.011   | 0.58 (0.13, 1)       | 0.00028 | 33550 19 0       | AU              |
| Volume of S central left hemisphere - imaging visit - value 0                                | 0.011   | -0.55 (-0.97, -0.13) | 0.00029 | 35921 21 0       | mm <sup>3</sup> |
| Volume of MD1 left hemisphere - imaging visit - value 0                                      | 0.011   | 0.54 (0.12, 0.97)    | 0.00029 | 35921 21 0       | mm <sup>3</sup> |
| Area of superiortemporal right hemisphere - imaging visit - value 0                          | 0.012   | 0.54 (0.12, 0.96)    | 0.00029 | 35921 21 0       | mm <sup>2</sup> |
| Weighted mean ICVF in tract inferior longitudinal fasciculus right - imaging visit - value 0 | 0.012   | -0.55 (-0.99, -0.12) | 0.00028 | 33547 19 0       | AU              |

| Phenotype                                                                                            | P value | Beta (95% CI)         | AAF      | Cases (RR RA AA) | Units              |
|------------------------------------------------------------------------------------------------------|---------|-----------------------|----------|------------------|--------------------|
| Fathers age at death - mean of all visits                                                            | 0.012   | -0.21 (-0.38, -0.047) | 2.00E-04 | 323649 132 0     | years              |
| Grey white contrast in lingual right hemisphere - imaging visit - value 0                            | 0.012   | 0.53 (0.12, 0.95)     | 0.00029  | 35921 21 0       | AU                 |
| Weighted mean ISOVF in tract superior longitudinal fasciculus left - imaging visit - value 0         | 0.012   | 0.56 (0.12, 1)        | 0.00028  | 33547 19 0       | AU                 |
| Weighted mean L1 in tract posterior thalamic radiation right - imaging visit - value 0               | 0.012   | 0.57 (0.12, 1)        | 0.00028  | 33548 19 0       | AU                 |
| Diastolic brachial blood pressure - mean of all visits                                               | 0.013   | 0.65 (0.14, 1.2)      | 0.00022  | 32350 14 0       | mmHg               |
| Weighted mean FA in tract uncinate fasciculus left - imaging visit - value 0                         | 0.013   | -0.56 (-1, -0.12)     | 0.00028  | 33548 19 0       | AU                 |
| Mean signal to noise ratio SNR left - mean of all visits                                             | 0.013   | 0.28 (0.06, 0.51)     | 0.00021  | 172716 72 0      | no_registered_unit |
| Mean arterial pressure during PWA - mean of all visits                                               | 0.013   | 0.65 (0.14, 1.2)      | 0.00022  | 32008 14 0       | mmHg               |
| Weighted mean ICVF in tract uncinate fasciculus right - imaging visit - value 0                      | 0.013   | -0.55 (-0.98, -0.11)  | 0.00028  | 33547 19 0       | AU                 |
| Total adipose tissue volume - mean of all visits                                                     | 0.013   | 0.9 (0.19, 1.6)       | 0.00044  | 8030 7 0         | litres             |
| Weighted mean L1 in tract inferior longitudinal fasciculus right - imaging visit - value 0           | 0.013   | 0.56 (0.12, 1)        | 0.00028  | 33548 19 0       | AU                 |
| Diastolic brachial blood pressure during PWA - mean of all visits                                    | 0.013   | 0.64 (0.13, 1.1)      | 0.00022  | 32009 14 0       | mmHg               |
| Mean thickness of G oc temp med Lingual left hemisphere - imaging visit - value 0                    | 0.014   | 0.53 (0.11, 0.96)     | 0.00029  | 35921 21 0       | mm                 |
| Maximum carotid IMT intima medial thickness at 150 degrees - mean of all visits                      | 0.014   | 0.65 (0.13, 1.2)      | 0.00026  | 23462 12 0       | micrometres        |
| Mean L1 in sagittal stratum on FA skeleton right - imaging visit - value 0                           | 0.014   | 0.56 (0.11, 1)        | 0.00028  | 33550 19 0       | AU                 |
| Mothers age at death - initial visit - mean                                                          | 0.014   | -0.23 (-0.41, -0.047) | 2.00E-04 | 254094 102 0     | years              |
| Weighted mean L1 in tract corticospinal tract left - imaging visit - value 0                         | 0.014   | 0.55 (0.11, 1)        | 0.00028  | 33548 19 0       | AU                 |
| Mean L2 in middle cerebellar peduncle on FA skeleton - imaging visit - value 0                       | 0.014   | 0.55 (0.11, 0.99)     | 0.00028  | 33550 19 0       | AU                 |
| Weighted mean FA in tract middle cerebellar peduncle - imaging visit - value 0                       | 0.014   | -0.56 (-1, -0.11)     | 0.00028  | 33548 19 0       | AU                 |
| Weighted mean ICVF in tract superior longitudinal fasciculus left - imaging visit - value 0          | 0.015   | -0.54 (-0.97, -0.11)  | 0.00028  | 33547 19 0       | AU                 |
| Weighted mean L2 in tract acoustic radiation right - imaging visit - value 0                         | 0.015   | 0.55 (0.11, 1)        | 0.00028  | 33548 19 0       | AU                 |
| Time spend outdoors in summer - mean of all visits                                                   | 0.015   | 0.18 (0.034, 0.32)    | 2.00E-04 | 393360 161 0     | hours/day          |
| Volume of Paralaminar nucleus right hemisphere - imaging visit - value 0                             | 0.015   | 0.52 (0.1, 0.95)      | 0.00029  | 35921 21 0       | mm <sup>3</sup>    |
| Area of superiorfrontal left hemisphere - imaging visit - value 0                                    | 0.015   | 0.52 (0.1, 0.94)      | 0.00029  | 35921 21 0       | mm <sup>2</sup>    |
| Volume of grey matter in Temporal Pole right - imaging visit - value 0                               | 0.015   | 0.53 (0.1, 0.97)      | 0.00028  | 35591 20 0       | mm <sup>3</sup>    |
| Volume of VA right hemisphere - imaging visit - value 0                                              | 0.015   | 0.52 (0.099, 0.93)    | 0.00029  | 35921 21 0       | mm <sup>3</sup>    |
| Mean ICVF in retrolenticular part of internal capsule on FA skeleton right - imaging visit - value 0 | 0.016   | -0.53 (-0.97, -0.1)   | 0.00028  | 33548 19 0       | AU                 |



| Phenotype                                                                                     | P value | Beta (95% CI)         | AAF      | Cases (RR RA AA) | Units              |
|-----------------------------------------------------------------------------------------------|---------|-----------------------|----------|------------------|--------------------|
| Fathers age - mean of all visits                                                              | 0.016   | -0.26 (-0.46, -0.048) | 2.00E-04 | 96182 38 0       | years              |
| Mean MD in uncinat fasciculus on FA skeleton right - imaging visit - value 0                  | 0.016   | 0.54 (0.1, 0.99)      | 0.00028  | 33550 19 0       | AU                 |
| Mean intensity of VentralDC left hemisphere - imaging visit - value 0                         | 0.016   | -0.52 (-0.94, -0.096) | 0.00029  | 35921 21 0       | AU                 |
| Volume of superiorparietal right hemisphere - imaging visit - value 0                         | 0.016   | 0.52 (0.095, 0.94)    | 0.00029  | 35921 21 0       | mm <sup>3</sup>    |
| Mean L3 in inferior cerebellar peduncle on FA skeleton right - imaging visit - value 0        | 0.016   | 0.54 (0.099, 0.99)    | 0.00028  | 33550 19 0       | AU                 |
| Mean ICVF in posterior limb of internal capsule on FA skeleton left - imaging visit - value 0 | 0.016   | -0.53 (-0.97, -0.097) | 0.00028  | 33548 19 0       | AU                 |
| Heel bone mineral density BMD - mean of all visits                                            | 0.017   | -0.21 (-0.38, -0.037) | 0.00021  | 245918 104 0     | g/cm <sup>2</sup>  |
| Heel bone mineral density BMD - initial visit - mean                                          | 0.017   | -0.21 (-0.38, -0.037) | 0.00021  | 245918 104 0     | g/cm <sup>2</sup>  |
| Weighted mean MO in tract uncinat fasciculus left - imaging visit - value 0                   | 0.017   | -0.54 (-0.99, -0.098) | 0.00028  | 33548 19 0       | AU                 |
| Average monthly beer plus cider intake - mean of all visits                                   | 0.017   | 0.33 (0.06, 0.61)     | 0.00029  | 40945 24 0       | pints              |
| Mean ISOVF in genu of corpus callosum on FA skeleton - imaging visit - value 0                | 0.017   | 0.54 (0.095, 0.98)    | 0.00028  | 33548 19 0       | AU                 |
| Peak expiratory flow PEF - initial visit - mean                                               | 0.018   | -0.15 (-0.27, -0.026) | 0.00021  | 392413 161 0     | litres/min         |
| Time spend outdoors in summer - initial visit - mean                                          | 0.018   | 0.17 (0.03, 0.31)     | 2.00E-04 | 390211 160 0     | hours/day          |
| Age diabetes diagnosed - mean of all visits                                                   | 0.018   | 0.71 (0.12, 1.3)      | 0.00017  | 20684 7 0        | years              |
| Weighted mean L3 in tract forceps minor - imaging visit - value 0                             | 0.018   | 0.53 (0.089, 0.96)    | 0.00028  | 33548 19 0       | AU                 |
| Mean L1 in anterior limb of internal capsule on FA skeleton left - imaging visit - value 0    | 0.019   | 0.53 (0.088, 0.97)    | 0.00028  | 33550 19 0       | AU                 |
| Weighted mean L2 in tract medial lemniscus left - imaging visit - value 0                     | 0.019   | 0.53 (0.088, 0.98)    | 0.00028  | 33548 19 0       | AU                 |
| Mean FA in tapetum on FA skeleton left - imaging visit - value 0                              | 0.019   | -0.53 (-0.97, -0.086) | 0.00028  | 33550 19 0       | AU                 |
| Volume of Corticoamygdaloid transitio right hemisphere - imaging visit - value 0              | 0.019   | 0.51 (0.082, 0.93)    | 0.00029  | 35921 21 0       | mm <sup>3</sup>    |
| Mean ISOVF in fornix cres stria terminalis on FA skeleton left - imaging visit - value 0      | 0.019   | 0.53 (0.087, 0.98)    | 0.00028  | 33548 19 0       | AU                 |
| Volume of LP left hemisphere - imaging visit - value 0                                        | 0.019   | 0.5 (0.08, 0.92)      | 0.00029  | 35921 21 0       | mm <sup>3</sup>    |
| Grey white contrast in cuneus left hemisphere - imaging visit - value 0                       | 0.02    | 0.5 (0.08, 0.91)      | 0.00029  | 35921 21 0       | AU                 |
| Area of superiortemporal right hemisphere - imaging visit - value 0                           | 0.02    | 0.5 (0.081, 0.92)     | 0.00029  | 35921 21 0       | mm <sup>3</sup>    |
| Heel bone mineral density BMD T score automated - mean of all visits                          | 0.02    | -0.2 (-0.37, -0.032)  | 0.00021  | 246031 104 0     | Std.Devs           |
| Heel bone mineral density BMD T score automated - initial visit - mean                        | 0.02    | -0.2 (-0.37, -0.032)  | 0.00021  | 246031 104 0     | Std.Devs           |
| Heel quantitative ultrasound index QUI direct entry - mean of all visits                      | 0.02    | -0.2 (-0.37, -0.032)  | 0.00021  | 246031 104 0     | no_registered_unit |
| Heel quantitative ultrasound index QUI direct entry - initial visit - mean                    | 0.02    | -0.2 (-0.37, -0.032)  | 0.00021  | 246031 104 0     | no_registered_unit |

| Phenotype                                                                                     | P value | Beta (95% CI)         | AAF      | Cases (RR RA AA) | Units              |
|-----------------------------------------------------------------------------------------------|---------|-----------------------|----------|------------------|--------------------|
| Mean intensity of Pallidum right hemisphere - imaging visit - value 0                         | 0.02    | -0.5 (-0.92, -0.079)  | 0.00029  | 35921 21 0       | AU                 |
| Mean ISOVF in posterior thalamic radiation on FA skeleton left - imaging visit - value 0      | 0.02    | 0.53 (0.084, 0.97)    | 0.00028  | 33548 19 0       | AU                 |
| Volume of L Sg left hemisphere - imaging visit - value 0                                      | 0.02    | 0.5 (0.078, 0.92)     | 0.00029  | 35921 21 0       | mm <sup>3</sup>    |
| Speed of sound through heel - mean of all visits                                              | 0.02    | -0.2 (-0.37, -0.032)  | 0.00021  | 246031 104 0     | m/s                |
| Speed of sound through heel - initial visit - mean                                            | 0.02    | -0.2 (-0.37, -0.032)  | 0.00021  | 246031 104 0     | m/s                |
| Area of insula left hemisphere - imaging visit - value 0                                      | 0.021   | 0.5 (0.077, 0.92)     | 0.00029  | 35921 21 0       | mm <sup>2</sup>    |
| Mean L2 in uncinate fasciculus on FA skeleton right - imaging visit - value 0                 | 0.021   | 0.52 (0.08, 0.96)     | 0.00028  | 33550 19 0       | AU                 |
| Age at first live birth - mean of all visits                                                  | 0.021   | -0.28 (-0.52, -0.043) | 0.00019  | 158561 59 0      | years              |
| Mean thickness of S central left hemisphere - imaging visit - value 0                         | 0.021   | -0.5 (-0.92, -0.076)  | 0.00029  | 35921 21 0       | mm                 |
| Weighted mean MD in tract forceps minor - imaging visit - value 0                             | 0.021   | 0.52 (0.078, 0.96)    | 0.00028  | 33548 19 0       | AU                 |
| Mean L2 in medial lemniscus on FA skeleton left - imaging visit - value 0                     | 0.021   | 0.52 (0.079, 0.97)    | 0.00028  | 33550 19 0       | AU                 |
| Weighted mean L3 in tract acoustic radiation right - imaging visit - value 0                  | 0.021   | 0.52 (0.079, 0.97)    | 0.00028  | 33548 19 0       | AU                 |
| Creatinine - mean of all visits                                                               | 0.021   | 0.14 (0.02, 0.25)     | 2.00E-04 | 411405 164 0     | mg/dL              |
| Creatinine - initial visit - mean                                                             | 0.021   | 0.14 (0.02, 0.25)     | 2.00E-04 | 410621 164 0     | mg/dL              |
| Age at first live birth - initial visit - mean                                                | 0.022   | -0.28 (-0.52, -0.041) | 0.00019  | 158529 59 0      | years              |
| Mean OD in superior fronto occipital fasciculus on FA skeleton left - imaging visit - value 0 | 0.022   | -0.52 (-0.96, -0.075) | 0.00028  | 33548 19 0       | AU                 |
| Speech reception threshold SRT estimate right - mean of all visits                            | 0.022   | 0.26 (0.038, 0.48)    | 0.00021  | 170294 72 0      | no_registered_unit |
| Mean thickness of S circular insula sup left hemisphere - imaging visit - value 0             | 0.022   | -0.49 (-0.92, -0.071) | 0.00029  | 35921 21 0       | mm                 |
| Weighted mean L1 in tract superior longitudinal fasciculus left - imaging visit - value 0     | 0.022   | 0.51 (0.073, 0.94)    | 0.00028  | 33548 19 0       | AU                 |
| Fathers age - initial visit - mean                                                            | 0.023   | -0.24 (-0.44, -0.033) | 2.00E-04 | 96087 38 0       | years              |
| Average acceleration 06 00 06 59 - mean of all visits                                         | 0.023   | 0.37 (0.051, 0.7)     | 0.00019  | 91659 34 0       | milli-gravity      |
| Average acceleration 06 00 06 59 - initial visit - mean                                       | 0.023   | 0.37 (0.051, 0.7)     | 0.00019  | 91659 34 0       | milli-gravity      |
| Grey white contrast in insula left hemisphere - imaging visit - value 0                       | 0.023   | -0.48 (-0.9, -0.066)  | 0.00029  | 35921 21 0       | AU                 |
| Weighted mean L2 in tract forceps minor - imaging visit - value 0                             | 0.023   | 0.51 (0.069, 0.95)    | 0.00028  | 33548 19 0       | AU                 |
| Baby birth weight - mean of all visits                                                        | 0.023   | 0.85 (0.12, 1.6)      | 0.00018  | 13632 5 0        | g                  |
| Baby birth weight - initial visit - mean                                                      | 0.023   | 0.85 (0.12, 1.6)      | 0.00018  | 13632 5 0        | g                  |
| Volume of LP right hemisphere - imaging visit - value 0                                       | 0.023   | 0.48 (0.066, 0.9)     | 0.00029  | 35921 21 0       | mm <sup>3</sup>    |

| Phenotype                                                                                     | P value | Beta (95% CI)          | AAF      | Cases (RR RA AA) | Units              |
|-----------------------------------------------------------------------------------------------|---------|------------------------|----------|------------------|--------------------|
| Standing height - initial visit - mean                                                        | 0.023   | -0.1 (-0.19, -0.014)   | 2.00E-04 | 429531 172 0     | cm                 |
| Standing height - mean of all visits                                                          | 0.024   | -0.099 (-0.19, -0.013) | 2.00E-04 | 429571 172 0     | cm                 |
| Area of superiortemporal right hemisphere - imaging visit - value 0                           | 0.024   | 0.48 (0.064, 0.9)      | 0.00029  | 35921 21 0       | mm <sup>2</sup>    |
| Mean intensity of VentralDC right hemisphere - imaging visit - value 0                        | 0.024   | -0.49 (-0.91, -0.063)  | 0.00029  | 35921 21 0       | AU                 |
| Mean intensity of Putamen right hemisphere - imaging visit - value 0                          | 0.025   | -0.48 (-0.9, -0.061)   | 0.00029  | 35921 21 0       | AU                 |
| Area of posteriorcingulate right hemisphere - imaging visit - value 0                         | 0.025   | 0.49 (0.062, 0.91)     | 0.00029  | 35921 21 0       | mm <sup>2</sup>    |
| Mean ISOVF in superior longitudinal fasciculus on FA skeleton right - imaging visit - value 0 | 0.025   | 0.5 (0.064, 0.95)      | 0.00028  | 33548 19 0       | AU                 |
| Mean thickness of V1 right hemisphere - imaging visit - value 0                               | 0.025   | 0.48 (0.061, 0.91)     | 0.00029  | 35921 21 0       | mm                 |
| Mean ICVF in sagittal stratum on FA skeleton left - imaging visit - value 0                   | 0.025   | -0.49 (-0.93, -0.062)  | 0.00028  | 33548 19 0       | AU                 |
| Mean FA in inferior cerebellar peduncle on FA skeleton right - imaging visit - value 0        | 0.025   | -0.51 (-0.95, -0.063)  | 0.00028  | 33550 19 0       | AU                 |
| 6mm asymmetry index left - initial visit - mean                                               | 0.026   | 0.48 (0.059, 0.9)      | 0.00021  | 48878 21 0       | no_registered_unit |
| Age high blood pressure diagnosed - initial visit - mean                                      | 0.026   | 0.23 (0.028, 0.44)     | 0.00028  | 103405 58 0      | years              |
| Mean L2 in posterior limb of internal capsule on FA skeleton left - imaging visit - value 0   | 0.026   | 0.5 (0.06, 0.94)       | 0.00028  | 33550 19 0       | AU                 |
| Area of paracentral right hemisphere - imaging visit - value 0                                | 0.026   | 0.48 (0.057, 0.9)      | 0.00029  | 35921 21 0       | mm <sup>2</sup>    |
| Weighted mean ICVF in tract uncinate fasciculus left - imaging visit - value 0                | 0.026   | -0.49 (-0.93, -0.059)  | 0.00028  | 33547 19 0       | AU                 |
| Grey white contrast in lateralloccipital right hemisphere - imaging visit - value 0           | 0.026   | 0.47 (0.056, 0.89)     | 0.00029  | 35921 21 0       | AU                 |
| Mean L3 in middle cerebellar peduncle on FA skeleton - imaging visit - value 0                | 0.026   | 0.5 (0.059, 0.94)      | 0.00028  | 33550 19 0       | AU                 |
| Volume of grey matter in Pallidum right - imaging visit - value 0                             | 0.027   | 0.49 (0.057, 0.92)     | 0.00028  | 35591 20 0       | mm <sup>3</sup>    |
| Mean thickness of S temporal sup left hemisphere - imaging visit - value 0                    | 0.027   | -0.48 (-0.9, -0.055)   | 0.00029  | 35921 21 0       | mm                 |
| Mean OD in inferior cerebellar peduncle on FA skeleton left - imaging visit - value 0         | 0.027   | 0.5 (0.057, 0.95)      | 0.00028  | 33548 19 0       | AU                 |
| Bread intake - mean of all visits                                                             | 0.028   | 0.16 (0.018, 0.3)      | 0.00019  | 421644 164 0     | slices/week        |
| Signal to noise ratio SNR of triplet right - mean of all visits                               | 0.028   | 0.25 (0.027, 0.47)     | 0.00021  | 173060 73 0      | no_registered_unit |
| Mean FA in corticospinal tract on FA skeleton right - imaging visit - value 0                 | 0.028   | -0.5 (-0.94, -0.055)   | 0.00028  | 33550 19 0       | AU                 |
| Mean MD in uncinate fasciculus on FA skeleton left - imaging visit - value 0                  | 0.028   | 0.5 (0.055, 0.94)      | 0.00028  | 33550 19 0       | AU                 |
| OD Contour 2 to 3 Region I3 Mean                                                              | 0.028   | -0.6 (-1.1, -0.065)    | 0.00015  | 43616 13 0       | NA                 |
| Mean ISOVF in superior longitudinal fasciculus on FA skeleton left - imaging visit - value 0  | 0.028   | 0.49 (0.054, 0.94)     | 0.00028  | 33548 19 0       | AU                 |
| Number of measurements made - initial visit - mean                                            | 0.028   | 0.11 (0.012, 0.21)     | 0.00021  | 392413 161 0     | no_registered_unit |

| Phenotype                                                                                          | P value | Beta (95% CI)         | AAF      | Cases (RR RA AA) | Units              |
|----------------------------------------------------------------------------------------------------|---------|-----------------------|----------|------------------|--------------------|
| Mean L1 in superior longitudinal fasciculus on FA skeleton left - imaging visit - value 0          | 0.028   | 0.49 (0.052, 0.92)    | 0.00028  | 33550 19 0       | AU                 |
| Volume of CeM left hemisphere - imaging visit - value 0                                            | 0.028   | 0.47 (0.049, 0.89)    | 0.00029  | 35921 21 0       | mm <sup>3</sup>    |
| Area of medialorbitofrontal left hemisphere - imaging visit - value 0                              | 0.028   | 0.47 (0.05, 0.9)      | 0.00029  | 35921 21 0       | mm <sup>2</sup>    |
| Weighted mean L2 in tract forceps major - imaging visit - value 0                                  | 0.029   | 0.49 (0.05, 0.93)     | 0.00028  | 33548 19 0       | AU                 |
| FEV1 FVC ratio Z score - mean of all visits                                                        | 0.029   | -0.18 (-0.34, -0.018) | 2.00E-04 | 342887 136 0     | Z                  |
| FEV1 FVC ratio Z score - initial visit - mean                                                      | 0.029   | -0.18 (-0.34, -0.018) | 2.00E-04 | 342887 136 0     | Z                  |
| Peak expiratory flow PEF - mean of all visits                                                      | 0.03    | -0.13 (-0.26, -0.013) | 2.00E-04 | 394984 162 0     | litres/min         |
| Mean FA in posterior limb of internal capsule on FA skeleton left - imaging visit - value 0        | 0.03    | -0.49 (-0.92, -0.048) | 0.00028  | 33550 19 0       | AU                 |
| Mean L3 in cerebral peduncle on FA skeleton left - imaging visit - value 0                         | 0.03    | 0.49 (0.048, 0.94)    | 0.00028  | 33550 19 0       | AU                 |
| Area of G S paracentral right hemisphere - imaging visit - value 0                                 | 0.03    | 0.47 (0.045, 0.89)    | 0.00029  | 35921 21 0       | mm <sup>2</sup>    |
| Mean tfMRI head motion averaged across space and time points - mean of all visits                  | 0.03    | 0.68 (0.065, 1.3)     | 0.00026  | 17058 9 0        | mm                 |
| Weighted mean MD in tract uncinate fasciculus right - imaging visit - value 0                      | 0.031   | 0.48 (0.044, 0.92)    | 0.00028  | 33548 19 0       | AU                 |
| Time first key touched - initial visit - mean                                                      | 0.031   | -0.58 (-1.1, -0.053)  | 0.00013  | 44675 12 0       | milliseconds       |
| Average acceleration 07 00 07 59 - mean of all visits                                              | 0.031   | 0.35 (0.032, 0.68)    | 0.00019  | 91659 34 0       | milli-gravity      |
| Average acceleration 07 00 07 59 - initial visit - mean                                            | 0.031   | 0.35 (0.032, 0.68)    | 0.00019  | 91659 34 0       | milli-gravity      |
| Weighted mean L3 in tract forceps major - imaging visit - value 0                                  | 0.031   | 0.49 (0.044, 0.93)    | 0.00028  | 33548 19 0       | AU                 |
| Area of paracentral right hemisphere - imaging visit - value 0                                     | 0.031   | 0.47 (0.042, 0.89)    | 0.00029  | 35921 21 0       | mm <sup>2</sup>    |
| Mean L1 in retrolenticular part of internal capsule on FA skeleton right - imaging visit - value 0 | 0.031   | 0.49 (0.044, 0.93)    | 0.00028  | 33550 19 0       | AU                 |
| Mean L3 in uncinate fasciculus on FA skeleton left - imaging visit - value 0                       | 0.031   | 0.49 (0.043, 0.93)    | 0.00028  | 33550 19 0       | AU                 |
| delta1 deconf                                                                                      | 0.032   | 0.44 (0.037, 0.84)    | 0.00026  | 28316 15 0       | no_registered_unit |
| Diastolic blood pressure automated reading - mean of all visits                                    | 0.032   | 0.16 (0.014, 0.31)    | 2.00E-04 | 407743 160 0     | mmHg               |
| Time spent watching television TV - mean of all visits                                             | 0.032   | 0.15 (0.013, 0.29)    | 2.00E-04 | 409778 166 0     | hours/day          |
| Mean thickness of Lat Fis ant Horizont right hemisphere - imaging visit - value 0                  | 0.033   | -0.46 (-0.89, -0.039) | 0.00029  | 35921 21 0       | mm                 |
| Volume of PuL left hemisphere - imaging visit - value 0                                            | 0.033   | 0.46 (0.038, 0.88)    | 0.00029  | 35921 21 0       | mm <sup>3</sup>    |
| Area of entorhinal left hemisphere - imaging visit - value 0                                       | 0.033   | 0.46 (0.037, 0.88)    | 0.00029  | 35921 21 0       | mm <sup>2</sup>    |
| Weighted mean ISOVF in tract posterior thalamic radiation left - imaging visit - value 0           | 0.033   | 0.48 (0.039, 0.93)    | 0.00028  | 33547 19 0       | AU                 |
| Weighted mean L3 in tract uncinate fasciculus right - imaging visit - value 0                      | 0.034   | 0.48 (0.037, 0.91)    | 0.00028  | 33548 19 0       | AU                 |

| Phenotype                                                                          | P value | Beta (95% CI)         | AAF      | Cases (RR RA AA) | Units              |
|------------------------------------------------------------------------------------|---------|-----------------------|----------|------------------|--------------------|
| Heel Broadband ultrasound attenuation direct entry - mean of all visits            | 0.034   | -0.18 (-0.35, -0.014) | 0.00021  | 246016 104 0     | dB/MHz             |
| Heel Broadband ultrasound attenuation direct entry - initial visit - mean          | 0.034   | -0.18 (-0.35, -0.014) | 0.00021  | 246016 104 0     | dB/MHz             |
| Mean MO in cingulum hippocampus on FA skeleton left - imaging visit - value 0      | 0.034   | -0.48 (-0.93, -0.036) | 0.00028  | 33550 19 0       | AU                 |
| Scanner transverse Y brain position - mean of all visits                           | 0.034   | 0.61 (0.045, 1.2)     | 0.00024  | 20407 10 0       | Units              |
| Neutrophil percentage - initial visit - mean                                       | 0.035   | 0.15 (0.011, 0.3)     | 2.00E-04 | 417306 167 0     | percent            |
| Volume of Amygdala right hemisphere - imaging visit - value 0                      | 0.035   | 0.45 (0.032, 0.88)    | 0.00029  | 35921 21 0       | mm <sup>3</sup>    |
| Mean intensity of CC Mid Posterior whole brain - imaging visit - value 0           | 0.036   | -0.45 (-0.88, -0.03)  | 0.00029  | 35921 21 0       | AU                 |
| Weighted mean ICVF in tract forceps major - imaging visit - value 0                | 0.036   | -0.47 (-0.9, -0.031)  | 0.00028  | 33547 19 0       | AU                 |
| Volume of S collat transv post left hemisphere - imaging visit - value 0           | 0.037   | 0.45 (0.027, 0.88)    | 0.00029  | 35921 21 0       | mm <sup>3</sup>    |
| Year job started - mean of all visits                                              | 0.037   | -0.21 (-0.4, -0.012)  | 0.00021  | 107327 45 0      | calendar year      |
| Year job started - initial visit - mean                                            | 0.037   | -0.21 (-0.4, -0.012)  | 0.00021  | 107327 45 0      | calendar year      |
| Mean signal to noise ratio SNR right - mean of all visits                          | 0.037   | 0.24 (0.014, 0.46)    | 0.00021  | 172703 73 0      | no_registered_unit |
| Volume of G parietal sup right hemisphere - imaging visit - value 0                | 0.037   | 0.45 (0.026, 0.88)    | 0.00029  | 35921 21 0       | mm <sup>3</sup>    |
| Volume of S oc sup transversal left hemisphere - imaging visit - value 0           | 0.037   | 0.45 (0.026, 0.88)    | 0.00029  | 35921 21 0       | mm <sup>3</sup>    |
| Duration visual acuity screen displayed right - initial visit - mean               | 0.038   | 0.31 (0.018, 0.61)    | 0.00022  | 96537 42 0       | seconds            |
| Volume of PuL right hemisphere - imaging visit - value 0                           | 0.038   | 0.45 (0.025, 0.87)    | 0.00029  | 35921 21 0       | mm <sup>3</sup>    |
| Volume of superiorparietal right hemisphere - imaging visit - value 0              | 0.038   | 0.45 (0.025, 0.88)    | 0.00029  | 35921 21 0       | mm <sup>3</sup>    |
| Ankle spacing width right - mean of all visits                                     | 0.038   | 0.2 (0.011, 0.4)      | 0.00021  | 166147 69 0      | mm                 |
| Grey white contrast in lateralloccipital left hemisphere - imaging visit - value 0 | 0.038   | 0.44 (0.024, 0.85)    | 0.00029  | 35921 21 0       | AU                 |
| Time spent watching television TV - initial visit - mean                           | 0.038   | 0.15 (0.0081, 0.29)   | 2.00E-04 | 407184 165 0     | hours/day          |
| Area of precuneus right hemisphere - imaging visit - value 0                       | 0.038   | 0.44 (0.024, 0.86)    | 0.00029  | 35921 21 0       | mm <sup>2</sup>    |
| Mean L1 in tapetum on FA skeleton right - imaging visit - value 0                  | 0.038   | 0.47 (0.026, 0.92)    | 0.00028  | 33550 19 0       | AU                 |
| Weighted mean FA in tract forceps minor - imaging visit - value 0                  | 0.038   | -0.46 (-0.9, -0.025)  | 0.00028  | 33548 19 0       | AU                 |
| Volume of S temporal transverse right hemisphere - imaging visit - value 0         | 0.038   | 0.45 (0.024, 0.88)    | 0.00029  | 35920 21 0       | mm <sup>3</sup>    |
| Weighted mean L2 in tract middle cerebellar peduncle - imaging visit - value 0     | 0.038   | 0.47 (0.025, 0.92)    | 0.00028  | 33548 19 0       | AU                 |
| Volume of S cingul Marginalis right hemisphere - imaging visit - value 0           | 0.039   | 0.45 (0.024, 0.88)    | 0.00029  | 35921 21 0       | mm <sup>3</sup>    |
| Volume of grey matter in Supracalcarine Cortex left - imaging visit - value 0      | 0.039   | 0.45 (0.024, 0.89)    | 0.00028  | 35591 20 0       | mm <sup>3</sup>    |

| Phenotype                                                                                         | P value | Beta (95% CI)         | AAF      | Cases (RR RA AA) | Units                       |
|---------------------------------------------------------------------------------------------------|---------|-----------------------|----------|------------------|-----------------------------|
| Mean L1 in retrolenticular part of internal capsule on FA skeleton left - imaging visit - value 0 | 0.039   | 0.47 (0.024, 0.91)    | 0.00028  | 33550 19 0       | AU                          |
| Duration to entering value - mean of all visits                                                   | 0.039   | 0.28 (0.014, 0.55)    | 0.00018  | 105503 39 0      | milliseconds                |
| Duration to entering value - initial visit - mean                                                 | 0.039   | 0.28 (0.014, 0.55)    | 0.00018  | 105503 39 0      | milliseconds                |
| Volume of Hippocampal tail left hemisphere - imaging visit - value 0                              | 0.039   | 0.44 (0.021, 0.86)    | 0.00029  | 35921 21 0       | mm <sup>3</sup>             |
| Area of precuneus right hemisphere - imaging visit - value 0                                      | 0.04    | 0.44 (0.021, 0.86)    | 0.00029  | 35921 21 0       | mm <sup>2</sup>             |
| Grey white contrast in cuneus right hemisphere - imaging visit - value 0                          | 0.04    | 0.44 (0.02, 0.85)     | 0.00029  | 35921 21 0       | AU                          |
| OD Contour 1 to 2 Region I3 Mean                                                                  | 0.04    | 0.55 (0.025, 1.1)     | 0.00015  | 43616 13 0       | NA                          |
| Ankle spacing width right - initial visit - mean                                                  | 0.04    | 0.23 (0.01, 0.45)     | 0.00019  | 137273 53 0      | mm                          |
| Area of precuneus right hemisphere - imaging visit - value 0                                      | 0.04    | 0.44 (0.019, 0.86)    | 0.00029  | 35921 21 0       | mm <sup>2</sup>             |
| Mean OD in inferior cerebellar peduncle on FA skeleton right - imaging visit - value 0            | 0.04    | 0.46 (0.02, 0.91)     | 0.00028  | 33548 19 0       | AU                          |
| Mean thickness of S suborbital right hemisphere - imaging visit - value 0                         | 0.041   | -0.45 (-0.87, -0.019) | 0.00029  | 35921 21 0       | mm                          |
| Systolic brachial blood pressure - mean of all visits                                             | 0.041   | 0.52 (0.022, 1)       | 0.00022  | 32348 14 0       | mmHg                        |
| Mean L3 in medial lemniscus on FA skeleton left - imaging visit - value 0                         | 0.041   | 0.46 (0.019, 0.91)    | 0.00028  | 33550 19 0       | AU                          |
| Area of entorhinal left hemisphere - imaging visit - value 0                                      | 0.041   | 0.44 (0.018, 0.86)    | 0.00029  | 35921 21 0       | mm <sup>2</sup>             |
| Area of S oc sup transversal left hemisphere - imaging visit - value 0                            | 0.041   | 0.44 (0.017, 0.87)    | 0.00029  | 35921 21 0       | mm <sup>2</sup>             |
| Mean thickness of G S frontomargin right hemisphere - imaging visit - value 0                     | 0.041   | -0.44 (-0.87, -0.017) | 0.00029  | 35921 21 0       | mm                          |
| Basophil count - mean of all visits                                                               | 0.041   | 0.14 (0.0055, 0.28)   | 2.00E-04 | 417965 167 0     | 10 <sup>9</sup> cells/Litre |
| Systolic brachial blood pressure during PWA - mean of all visits                                  | 0.042   | 0.52 (0.02, 1)        | 0.00022  | 32009 14 0       | mmHg                        |
| Central systolic blood pressure during PWA - mean of all visits                                   | 0.042   | 0.51 (0.019, 1)       | 0.00022  | 32008 14 0       | mmHg                        |
| 6mm asymmetry index left - mean of all visits                                                     | 0.042   | 0.42 (0.015, 0.82)    | 0.00021  | 55432 23 0       | no_registered_unit          |
| Immature reticulocyte fraction - initial visit - mean                                             | 0.042   | 0.15 (0.0054, 0.3)    | 2.00E-04 | 411137 164 0     | ratio                       |
| Mean thickness of G oc temp med Lingual right hemisphere - imaging visit - value 0                | 0.042   | 0.44 (0.015, 0.86)    | 0.00029  | 35921 21 0       | mm                          |
| Average monthly beer plus cider intake - initial visit - mean                                     | 0.043   | 0.32 (0.01, 0.62)     | 3.00E-04 | 32090 19 0       | pints                       |
| Volume of precuneus right hemisphere - imaging visit - value 0                                    | 0.043   | 0.43 (0.013, 0.85)    | 0.00029  | 35921 21 0       | mm <sup>3</sup>             |
| Bread intake - initial visit - mean                                                               | 0.043   | 0.15 (0.0045, 0.29)   | 0.00019  | 420880 164 0     | slices/week                 |
| Mean thickness of G pariet inf Supramar left hemisphere - imaging visit - value 0                 | 0.043   | -0.44 (-0.86, -0.013) | 0.00029  | 35921 21 0       | mm                          |
| Time first key touched - mean of all visits                                                       | 0.043   | -0.39 (-0.78, -0.012) | 0.00017  | 67222 23 0       | milliseconds                |

| Phenotype                                                                                 | P value | Beta (95% CI)           | AAF      | Cases (RR RA AA) | Units           |
|-------------------------------------------------------------------------------------------|---------|-------------------------|----------|------------------|-----------------|
| Volume of L Sg right hemisphere - imaging visit - value 0                                 | 0.044   | 0.44 (0.012, 0.86)      | 0.00029  | 35921 21 0       | mm <sup>3</sup> |
| QRS duration - mean of all visits                                                         | 0.044   | -0.44 (-0.87, -0.012)   | 0.00025  | 33775 17 0       | ms              |
| Weighted mean MO in tract medial lemniscus left - imaging visit - value 0                 | 0.045   | -0.45 (-0.9, -0.011)    | 0.00028  | 33548 19 0       | AU              |
| Mean FA in medial lemniscus on FA skeleton right - imaging visit - value 0                | 0.045   | -0.45 (-0.9, -0.011)    | 0.00028  | 33550 19 0       | AU              |
| RGC_CornealAstigmatism_3mm_right                                                          | 0.045   | 0.3 (0.0066, 0.59)      | 0.00021  | 103404 44 0      | NA              |
| 3mm cylindrical power right - mean of all visits                                          | 0.045   | -0.3 (-0.59, -0.0066)   | 0.00021  | 103404 44 0      | diopters        |
| Years since last cervical smear test - mean of all visits                                 | 0.045   | 0.21 (0.0047, 0.43)     | 0.00019  | 182585 70 0      | years           |
| Grey white contrast in temporalpole left hemisphere - imaging visit - value 0             | 0.045   | -0.43 (-0.85, -0.0093)  | 0.00029  | 35921 21 0       | AU              |
| Mean thickness of G cuneus right hemisphere - imaging visit - value 0                     | 0.045   | 0.43 (0.0093, 0.86)     | 0.00029  | 35921 21 0       | mm              |
| Average weekly beer plus cider intake - initial visit - mean                              | 0.045   | 0.13 (0.0028, 0.26)     | 0.00017  | 304976 104 0     | pints           |
| Volume of S parieto occipital left hemisphere - imaging visit - value 0                   | 0.046   | 0.43 (0.0083, 0.85)     | 0.00029  | 35921 21 0       | mm <sup>3</sup> |
| Diastolic blood pressure automated reading - initial visit - mean                         | 0.046   | 0.15 (0.0028, 0.3)      | 0.00019  | 405855 158 0     | mmHg            |
| Retinol - initial visit - mean                                                            | 0.046   | 0.4 (0.0074, 0.79)      | 2.00E-04 | 59316 24 0       | ug              |
| Area of G Ins lg S cent ins left hemisphere - imaging visit - value 0                     | 0.046   | 0.43 (0.0077, 0.86)     | 0.00029  | 35921 21 0       | mm <sup>2</sup> |
| Weighted mean MO in tract parahippocampal part of cingulum left - imaging visit - value 0 | 0.046   | -0.46 (-0.9, -0.0079)   | 0.00028  | 33548 19 0       | AU              |
| Inverted temporal signal to noise ratio in pre processed tfMRI - mean of all visits       | 0.046   | 0.63 (0.0099, 1.2)      | 0.00026  | 17058 9 0        | ratio           |
| Mean OD in posterior corona radiata on FA skeleton left - imaging visit - value 0         | 0.047   | -0.45 (-0.89, -0.0068)  | 0.00028  | 33548 19 0       | AU              |
| Volume of Hippocampal tail right hemisphere - imaging visit - value 0                     | 0.047   | 0.42 (0.0056, 0.84)     | 0.00029  | 35921 21 0       | mm <sup>3</sup> |
| Weighted mean ISOVF in tract uncinata fasciculus left - imaging visit - value 0           | 0.047   | 0.45 (0.0054, 0.9)      | 0.00028  | 33547 19 0       | AU              |
| Mean OD in superior cerebellar peduncle on FA skeleton left - imaging visit - value 0     | 0.047   | 0.45 (0.0051, 0.89)     | 0.00028  | 33548 19 0       | AU              |
| Weighted mean ISOVF in tract anterior thalamic radiation left - imaging visit - value 0   | 0.047   | 0.45 (0.0052, 0.89)     | 0.00028  | 33547 19 0       | AU              |
| Mean L1 in fornix cres stria terminalis on FA skeleton left - imaging visit - value 0     | 0.048   | 0.45 (0.0036, 0.9)      | 0.00028  | 33550 19 0       | AU              |
| Weighted mean OD in tract middle cerebellar peduncle - imaging visit - value 0            | 0.048   | 0.45 (0.0032, 0.9)      | 0.00028  | 33547 19 0       | AU              |
| Mean MO in sagittal stratum on FA skeleton right - imaging visit - value 0                | 0.049   | -0.45 (-0.89, -0.0024)  | 0.00028  | 33550 19 0       | AU              |
| Mothers age at death - mean of all visits                                                 | 0.049   | -0.18 (-0.36, -0.00085) | 0.00021  | 263112 108 0     | years           |
| Neutrophill percentage - mean of all visits                                               | 0.049   | 0.14 (0.00051, 0.29)    | 2.00E-04 | 417970 167 0     | percent         |

| <b>Phenotype</b>                                                           | <b>P value</b> | <b>Beta (95% CI)</b> | <b>AAF</b> | <b>Cases<br/>(RR RA AA)</b> | <b>Units</b>    |
|----------------------------------------------------------------------------|----------------|----------------------|------------|-----------------------------|-----------------|
| Volume of grey matter in Precuneous Cortex right - imaging visit - value 0 | 0.049          | 0.43 (0.0014, 0.86)  | 0.00028    | 35591 20 0                  | mm <sup>3</sup> |
| Volume of paracentral right hemisphere - imaging visit - value 0           | 0.049          | 0.43 (0.0014, 0.85)  | 0.00029    | 35921 21 0                  | mm <sup>3</sup> |

1. Shown are quantitative phenotypes with p values below 0.05, sorted by increasing p-value. From left-to-right is the phenotype, the effect size (regression beta on RINT scale [11-13] with 95% confidence interval), the p-value, counts of ref/ref genotypes, counts of ref/alt heterozygous genotypes, and units. AU, arbitrary units.
2. Highlight of phenotypes mentioned in the main text



**Supplementary Table 21. *NOTCH3* EGFr Domains<sup>1</sup>.**

| <b>Domain</b> | <b>Start</b> | <b>End</b> |
|---------------|--------------|------------|
| EGFr 1        | 40           | 77         |
| EGFr 2        | 78           | 118        |
| EGFr 3        | 119          | 156        |
| EGFr 4        | 158          | 195        |
| EGFr 5        | 197          | 234        |
| EGFr 6        | 236          | 272        |
| EGFr 7        | 274          | 312        |
| EGFr 8        | 314          | 350        |
| EGFr 9        | 351          | 389        |
| EGFr 10       | 391          | 429        |
| EGFr 11       | 431          | 467        |
| EGFr 12       | 469          | 505        |
| EGFr 13       | 507          | 543        |
| EGFr 14       | 545          | 580        |
| EGFr 15       | 582          | 618        |
| EGFr 16       | 620          | 655        |
| EGFr 17       | 657          | 693        |
| EGFr 18       | 695          | 730        |
| EGFr 19       | 734          | 770        |
| EGFr 20       | 771          | 808        |
| EGFr 21       | 810          | 847        |
| EGFr 22       | 849          | 885        |
| EGFr 23       | 887          | 922        |
| EGFr 24       | 924          | 960        |
| EGFr 25       | 962          | 998        |
| EGFr 26       | 1000         | 1034       |
| EGFr 27       | 1036         | 1082       |
| EGFr 28       | 1084         | 1120       |
| EGFr 29       | 1122         | 1158       |
| EGFr 30       | 1160         | 1203       |
| EGFr 31       | 1205         | 1244       |
| EGFr 32       | 1246         | 1287       |
| EGFr 33       | 1289         | 1325       |
| EGFr 34       | 1335         | 1373       |

<sup>1</sup>. The start and end positions in the protein sequence for each of 34 EGFr domains was obtained from PROTSITE [14]. Shown is the domain #, codon start residue, and codon end residue.

**Supplementary Table 22. Cys-altering Variants in UKB Included in Burden Test<sup>1</sup>.**

| Chrom:pos:ref:alt | Exon    | Domain class | EGFr Domain number | HGVS transcript | HGVS protein | Odds Ratio (95 % CI) | Pval     | AAF      | AAC | Case Counts | Control Counts | UKB AAF  | PGR AAF  |
|-------------------|---------|--------------|--------------------|-----------------|--------------|----------------------|----------|----------|-----|-------------|----------------|----------|----------|
| 19:15197537:G:A   | Exon 2  | EGFr 1-6     | EGFr 1             | c.160C>T        | p.Arg54Cys   | NC                   | NC       | 1.16E-06 | 1   | 9143 0 0    | 371402 1 0     | 1.10E-06 | 0.00E+00 |
| 19:15192449:G:A   | Exon 3  | EGFr 1-6     | EGFr 2             | c.268C>T        | p.Arg90Cys   | NC                   | NC       | 1.16E-06 | 1   | 9142 1 0    | 371403 0 0     | 1.10E-06 | 0.00E+00 |
| 19:15192389:G:A   | Exon 3  | EGFr 1-6     | EGFr 2             | c.328C>T        | p.Arg110Cys  | NC                   | NC       | 2.32E-06 | 2   | 9142 1 0    | 371399 1 0     | 2.20E-06 | 0.00E+00 |
| 19:15192218:G:A   | Exon 4  | EGFr 1-6     | EGFr 3             | c.421C>T        | p.Arg141Cys  | NC                   | NC       | 5.80E-06 | 4   | 9141 2 0    | 371399 2 0     | 5.50E-06 | 0.00E+00 |
| 19:15192182:G:A   | Exon 4  | EGFr 1-6     | EGFr 3             | c.457C>T        | p.Arg153Cys  | NC                   | NC       | 1.16E-06 | 1   | 9142 1 0    | 371396 0 0     | 1.10E-06 | 0.00E+00 |
| 19:15192134:G:A   | Exon 4  | EGFr 1-6     | EGFr 4             | c.505C>T        | p.Arg169Cys  | NC                   | NC       | 2.32E-06 | 2   | 9143 0 0    | 371401 2 0     | 2.20E-06 | 6.26E-06 |
| 19:15192095:G:A   | Exon 4  | EGFr 1-6     | EGFr 4             | c.544C>T        | p.Arg182Cys  | NC                   | NC       | 8.12E-06 | 3   | 9142 1 0    | 371401 2 0     | 7.70E-06 | 0.00E+00 |
| 19:15192020:G:A   | Exon 4  | EGFr 1-6     | EGFr 5             | c.619C>T        | p.Arg207Cys  | NC                   | NC       | 2.32E-06 | 1   | 9143 0 0    | 371402 1 0     | 2.20E-06 | 1.25E-05 |
| 19:15191529:A:T   | Exon 6  | EGFr 7-34    | EGFr 7             | c.931T>A        | p.Cys311Ser  | NC                   | NC       | 2.32E-06 | 1   | 9143 0 0    | 371402 1 0     | 2.20E-06 | 0.00E+00 |
| 19:15191507:C:A   | Exon 6  | EGFr 7-34    | EGFr 8             | c.953G>T        | p.Cys318Phe  | NC                   | NC       | 2.32E-06 | 1   | 9143 0 0    | 371402 1 0     | 2.20E-06 | 0.00E+00 |
| 19:15191466:G:A   | Exon 6  | EGFr 7-34    | EGFr 8             | c.994C>T        | p.Arg332Cys  | NC                   | NC       | 1.16E-06 | 1   | 9143 0 0    | 371402 1 0     | 1.10E-06 | 0.00E+00 |
| 19:15191450:T:C   | Exon 6  | EGFr 7-34    | EGFr 8             | c.1010A>G       | p.Tyr337Cys  | NC                   | NC       | 1.16E-06 | 1   | 9143 0 0    | 371402 1 0     | 1.10E-06 | 0.00E+00 |
| 19:15189386:C:T   | Exon 7  | EGFr 7-34    | EGFr 9             | c.1079G>A       | p.Cys360Tyr  | NC                   | NC       | 1.16E-06 | 1   | 9143 0 0    | 371402 1 0     | 1.10E-06 | 0.00E+00 |
| 19:15189145:A:G   | Exon 8  | EGFr 7-34    | EGFr 10            | c.1222T>C       | p.Cys408Arg  | NC                   | NC       | 1.16E-06 | 1   | 9143 0 0    | 371402 1 0     | 1.10E-06 | 0.00E+00 |
| 19:15189112:A:T   | Exon 8  | EGFr 7-34    | EGFr 10            | c.1255T>A       | p.Cys419Ser  | NC                   | NC       | 1.16E-06 | 1   | 9143 0 0    | 371402 1 0     | 1.10E-06 | 0.00E+00 |
| 19:15189106:G:A   | Exon 8  | EGFr 7-34    | EGFr 10            | c.1261C>T       | p.Arg421Cys  | NC                   | NC       | 2.32E-06 | 2   | 9143 0 0    | 371401 2 0     | 2.20E-06 | 0.00E+00 |
| 19:15189083:A:C   | Exon 8  | EGFr 7-34    | EGFr 10            | c.1284T>G       | p.Cys428Trp  | 0.36 (0,587.18)      | 7.88E-01 | 6.57E-06 | 5   | 9143 0 0    | 371398 5 0     | 5.50E-06 | 0.00E+00 |
| 19:15189003:C:T   | Exon 8  | EGFr 7-34    | EGFr 11            | c.1364G>A       | p.Cys455Tyr  | NC                   | NC       | 1.16E-06 | 1   | 9143 0 0    | 371402 1 0     | 1.10E-06 | 0.00E+00 |
| 19:15188301:T:A   | Exon 9  | EGFr 7-34    | EGFr 12            | c.1426A>T       | p.Ser476Cys  | NC                   | NC       | 3.48E-06 | 3   | 9143 0 0    | 371400 3 0     | 3.30E-06 | 0.00E+00 |
| 19:15188286:C:A   | Exon 9  | EGFr 7-34    | EGFr 12            | c.1441G>T       | p.Gly481Cys  | NC                   | NC       | 2.32E-06 | 2   | 9143 0 0    | 371399 2 0     | 2.20E-06 | 0.00E+00 |
| 19:15187977:A:G   | Exon 10 | EGFr 7-34    | EGFr 12            | c.1510T>C       | p.Cys504Arg  | NC                   | NC       | 1.16E-06 | 1   | 9143 0 0    | 371402 1 0     | 1.10E-06 | 0.00E+00 |
| 19:15187940:C:A   | Exon 10 | EGFr 7-34    | EGFr 13            | c.1547G>T       | p.Cys516Phe  | 0.36 (0,45.79)       | 6.77E-01 | 9.20E-06 | 7   | 9142 0 0    | 371396 7 0     | 7.70E-06 | 0.00E+00 |
| 19:15187940:C:T   | Exon 10 | EGFr 7-34    | EGFr 13            | c.1547G>A       | p.Cys516Tyr  | NC                   | NC       | 1.16E-06 | 1   | 9142 1 0    | 371396 0 0     | 1.10E-06 | 0.00E+00 |
| 19:15187922:C:G   | Exon 10 | EGFr 7-34    | EGFr 13            | c.1565G>C       | p.Cys522Ser  | NC                   | NC       | 1.16E-06 | 1   | 9143 0 0    | 371402 1 0     | 1.10E-06 | 0.00E+00 |
| 19:15187893:G:A   | Exon 10 | EGFr 7-34    | EGFr 13            | c.1594C>T       | p.Arg532Cys  | NC                   | NC       | 4.64E-06 | 4   | 9143 0 0    | 371397 4 0     | 4.40E-06 | 0.00E+00 |
| 19:15187315:G:A   | Exon 11 | EGFr 7-34    | No EGFr domain     | c.1630C>T       | p.Arg544Cys  | NC                   | NC       | 2.32E-06 | 2   | 9142 1 0    | 371398 1 0     | 1.65E-05 | 2.31E-04 |

| Chrom:pos:ref:alt | Exon    | Domain class | EGFr Domain number | HGVS transcript | HGVS protein | Odds Ratio (95 % CI) | Pval     | AAF      | AAC | Case Counts | Control Counts | UKB AAF  | PGR AAF  |
|-------------------|---------|--------------|--------------------|-----------------|--------------|----------------------|----------|----------|-----|-------------|----------------|----------|----------|
| 19:15187284:C:A   | Exon 11 | EGFr 7-34    | EGFr 14            | c.1661G>T       | p.Cys554Phe  | NC                   | NC       | 1.16E-06 | 1   | 9143 0 0    | 371402 1 0     | 1.10E-06 | 0.00E+00 |
| 19:15187273:G:A   | Exon 11 | EGFr 7-34    | EGFr 14            | c.1672C>T       | p.Arg558Cys  | 0.36 (0.28,51)       | 6.45E-01 | 1.31E-05 | 10  | 9137 0 0    | 371191 10 0    | 4.40E-06 | 6.26E-06 |
| 19:15187213:G:A   | Exon 11 | EGFr 7-34    | EGFr 14            | c.1732C>T       | p.Arg578Cys  | 0.35 (0.04,3.21)     | 3.56E-01 | 4.60E-05 | 35  | 9138 0 0    | 371246 35 0    | 1.43E-05 | 4.38E-05 |
| 19:15187209:C:T   | Exon 11 | EGFr 7-34    | EGFr 14            | c.1736G>A       | p.Cys579Tyr  | NC                   | NC       | 1.16E-06 | 1   | 9143 0 0    | 371402 1 0     | 2.20E-06 | 0.00E+00 |
| 19:15187186:G:A   | Exon 11 | EGFr 7-34    | EGFr 15            | c.1759C>T       | p.Arg587Cys  | NC                   | NC       | 4.64E-06 | 3   | 9143 0 0    | 371381 3 0     | 7.70E-06 | 1.25E-05 |
| 19:15187171:G:A   | Exon 11 | EGFr 7-34    | EGFr 15            | c.1774C>T       | p.Arg592Cys  | NC                   | NC       | 1.16E-06 | 1   | 9143 0 0    | 371383 1 0     | 1.10E-06 | 0.00E+00 |
| 19:15187126:G:A   | Exon 11 | EGFr 7-34    | EGFr 15            | c.1819C>T       | p.Arg607Cys  | 6.7 (1.22,36.78)     | 2.86E-02 | 1.97E-05 | 15  | 9136 2 0    | 370946 13 0    | 7.70E-06 | 0.00E+00 |
| 19:15187121:G:C   | Exon 11 | EGFr 7-34    | EGFr 15            | c.1824C>G       | p.Cys608Trp  | NC                   | NC       | 1.16E-06 | 1   | 9143 0 0    | 371401 1 0     | 1.10E-06 | 0.00E+00 |
| 19:15186911:G:A   | Exon 12 | EGFr 7-34    | EGFr 16            | c.1918C>T       | p.Arg640Cys  | 14.67 (2.23,96.37)   | 5.15E-03 | 1.45E-05 | 11  | 9141 2 0    | 371394 9 0     | 2.20E-05 | 0.00E+00 |
| 19:15185670:C:T   | Exon 13 | EGFr 7-34    | EGFr 16            | c.1961G>A       | p.Cys654Tyr  | NC                   | NC       | 1.16E-06 | 1   | 9143 0 0    | 371402 1 0     | 1.10E-06 | 0.00E+00 |
| 19:15185632:C:A   | Exon 13 | EGFr 7-34    | EGFr 17            | c.1999G>T       | p.Gly667Cys  | NC                   | NC       | 2.32E-06 | 1   | 9143 0 0    | 371398 1 0     | 2.20E-06 | 0.00E+00 |
| 19:15185619:G:C   | Exon 13 | EGFr 7-34    | EGFr 17            | c.2012C>G       | p.Ser671Cys  | NC                   | NC       | 4.64E-06 | 3   | 9143 0 0    | 371400 3 0     | 4.40E-06 | 0.00E+00 |
| 19:15185616:C:T   | Exon 13 | EGFr 7-34    | EGFr 17            | c.2015G>A       | p.Cys672Tyr  | NC                   | NC       | 1.16E-06 | 1   | 9143 0 0    | 371402 1 0     | 1.10E-06 | 0.00E+00 |
| 19:15185593:G:A   | Exon 13 | EGFr 7-34    | EGFr 17            | c.2038C>T       | p.Arg680Cys  | NC                   | NC       | 2.32E-06 | 1   | 9142 1 0    | 371403 0 0     | 3.30E-06 | 2.50E-05 |
| 19:15185404:G:A   | Exon 14 | EGFr 7-34    | EGFr 18            | c.2149C>T       | p.Arg717Cys  | 0.35 (0.03,3.68)     | 3.83E-01 | 3.68E-05 | 28  | 9143 0 0    | 371375 28 0    | 3.19E-05 | 0.00E+00 |
| 19:15185394:C:T   | Exon 14 | EGFr 7-34    | EGFr 18            | c.2159G>A       | p.Cys720Tyr  | NC                   | NC       | 1.16E-06 | 1   | 9143 0 0    | 371402 1 0     | 1.10E-06 | 0.00E+00 |
| 19:15185371:G:A   | Exon 14 | EGFr 7-34    | EGFr 18            | c.2182C>T       | p.Arg728Cys  | 0.36 (0.43,27)       | 6.74E-01 | 1.45E-05 | 11  | 9143 0 0    | 371392 11 0    | 1.65E-05 | 1.25E-05 |
| 19:15185334:G:C   | Exon 14 | EGFr 7-34    | EGFr 19            | c.2219C>G       | p.Ser740Cys  | NC                   | NC       | 1.16E-06 | 1   | 9143 0 0    | 371402 1 0     | 1.10E-06 | 0.00E+00 |
| 19:15185280:C:T   | Exon 14 | EGFr 7-34    | EGFr 19            | c.2273G>A       | p.Cys758Tyr  | NC                   | NC       | 1.16E-06 | 1   | 9143 0 0    | 371402 1 0     | 1.10E-06 | 0.00E+00 |
| 19:15185017:G:A   | Exon 15 | EGFr 7-34    | EGFr 19            | c.2299C>T       | p.Arg767Cys  | 0.35 (0.69)          | 6.99E-01 | 1.04E-05 | 7   | 9143 0 0    | 371382 7 0     | 1.10E-05 | 1.25E-05 |
| 19:15184963:G:A   | Exon 15 | EGFr 7-34    | EGFr 20            | c.2353C>T       | p.Arg785Cys  | 23.74 (0.42,1332.09) | 1.23E-01 | 1.05E-05 | 8   | 9142 1 0    | 371396 7 0     | 1.32E-05 | 0.00E+00 |
| 19:15184929:C:G   | Exon 15 | EGFr 7-34    | EGFr 20            | c.2387G>C       | p.Cys796Ser  | NC                   | NC       | 1.16E-06 | 1   | 9143 0 0    | 371402 1 0     | 1.10E-06 | 0.00E+00 |
| 19:15184923:C:T   | Exon 15 | EGFr 7-34    | EGFr 20            | c.2393G>A       | p.Cys798Tyr  | NC                   | NC       | 2.32E-06 | 2   | 9143 0 0    | 371401 2 0     | 2.20E-06 | 0.00E+00 |
| 19:15184910:C:A   | Exon 15 | EGFr 7-34    | EGFr 20            | c.2406G>T       | p.Trp802Cys  | 21 (1.7,260)         | 1.83E-02 | 6.96E-06 | 5   | 9142 1 0    | 371398 4 0     | 6.60E-06 | 0.00E+00 |
| 19:15181794:G:C   | Exon 17 | EGFr 7-34    | EGFr 22            | c.2574C>G       | p.Cys858Trp  | NC                   | NC       | 1.16E-06 | 1   | 9143 0 0    | 371401 1 0     | 1.10E-06 | 0.00E+00 |
| 19:15181751:A:G   | Exon 17 | EGFr 7-34    | EGFr 22            | c.2617T>C       | p.Cys873Arg  | NC                   | NC       | 1.16E-06 | 1   | 9143 0 0    | 371402 1 0     | 1.10E-06 | 0.00E+00 |
| 19:15181750:C:A   | Exon 17 | EGFr 7-34    | EGFr 22            | c.2618G>T       | p.Cys873Phe  | NC                   | NC       | 1.16E-06 | 1   | 9143 0 0    | 371402 1 0     | 1.10E-06 | 0.00E+00 |

| Chrom:pos:ref:alt | Exon    | Domain class | EGFr Domain number | HGVS transcript | HGVS protein | Odds Ratio (95 % CI) | Pval     | AAF      | AAC | Case Counts | Control Counts | UKB AAF  | PGR AAF  |
|-------------------|---------|--------------|--------------------|-----------------|--------------|----------------------|----------|----------|-----|-------------|----------------|----------|----------|
| 19:15181640:A:G   | Exon 17 | EGFr 7-34    | EGFr 23            | c.2728T>C       | p.Cys910Arg  | NC                   | NC       | 2.32E-06 | 2   | 9143 0 0    | 371401 2 0     | 2.20E-06 | 0.00E+00 |
| 19:15181639:C:T   | Exon 17 | EGFr 7-34    | EGFr 23            | c.2729G>A       | p.Cys910Tyr  | NC                   | NC       | 5.80E-06 | 4   | 9143 0 0    | 371399 4 0     | 5.50E-06 | 0.00E+00 |
| 19:15181633:C:G   | Exon 17 | EGFr 7-34    | EGFr 23            | c.2735G>C       | p.Cys912Ser  | NC                   | NC       | 2.32E-06 | 2   | 9143 0 0    | 371401 2 0     | 2.20E-06 | 0.00E+00 |
| 19:15181621:T:C   | Exon 17 | EGFr 7-34    | EGFr 23            | c.2747A>G       | p.Tyr916Cys  | 0.35 (0.01,17.32)    | 5.99E-01 | 1.18E-05 | 9   | 9143 0 0    | 371394 9 0     | 1.10E-05 | 0.00E+00 |
| 19:15181139:C:G   | Exon 18 | EGFr 7-34    | EGFr 24            | c.2816G>C       | p.Cys939Ser  | NC                   | NC       | 2.32E-06 | 2   | 9143 0 0    | 371401 2 0     | 2.20E-06 | 0.00E+00 |
| 19:15181043:C:T   | Exon 18 | EGFr 7-34    | EGFr 25            | c.2912G>A       | p.Cys971Tyr  | NC                   | NC       | 1.16E-06 | 1   | 9143 0 0    | 371402 1 0     | 1.10E-06 | 0.00E+00 |
| 19:15180999:A:G   | Exon 18 | EGFr 7-34    | EGFr 25            | c.2956T>C       | p.Cys986Arg  | NC                   | NC       | 1.16E-06 | 1   | 9143 0 0    | 371402 1 0     | 1.10E-06 | 1.25E-05 |
| 19:15180807:G:A   | Exon 19 | EGFr 7-34    | EGFr 26            | c.3016C>T       | p.Arg1006Cys | NC                   | NC       | 1.16E-06 | 1   | 9143 0 0    | 371402 1 0     | 1.10E-06 | 0.00E+00 |
| 19:15180780:A:G   | Exon 19 | EGFr 7-34    | EGFr 26            | c.3043T>C       | p.Cys1015Arg | NC                   | NC       | 1.16E-06 | 1   | 9143 0 0    | 371402 1 0     | 1.10E-06 | 0.00E+00 |
| 19:15180732:G:A   | Exon 19 | EGFr 7-34    | EGFr 26            | c.3091C>T       | p.Arg1031Cys | NC                   | NC       | 3.48E-06 | 3   | 9143 0 0    | 371400 3 0     | 3.30E-06 | 0.00E+00 |
| 19:15180235:C:T   | Exon 20 | EGFr 7-34    | EGFr 27            | c.3164G>A       | p.Cys1055Tyr | NC                   | NC       | 1.16E-06 | 1   | 9143 0 0    | 371402 1 0     | 1.10E-06 | 0.00E+00 |
| 19:15180217:C:T   | Exon 20 | EGFr 7-34    | EGFr 27            | c.3182G>A       | p.Cys1061Tyr | NC                   | NC       | 3.48E-06 | 3   | 9143 0 0    | 371400 3 0     | 3.30E-06 | 0.00E+00 |
| 19:15180173:G:A   | Exon 20 | EGFr 7-34    | EGFr 27            | c.3226C>T       | p.Arg1076Cys | NC                   | NC       | 1.16E-06 | 1   | 9143 0 0    | 371402 1 0     | 1.10E-06 | 1.25E-05 |
| 19:15180101:G:A   | Exon 20 | EGFr 7-34    | EGFr 28            | c.3298C>T       | p.Arg1100Cys | NC                   | NC       | 2.32E-06 | 2   | 9143 0 0    | 371401 2 0     | 3.30E-06 | 0.00E+00 |
| 19:15180077:A:G   | Exon 20 | EGFr 7-34    | EGFr 28            | c.3322T>C       | p.Cys1108Arg | NC                   | NC       | 2.32E-06 | 2   | 9143 0 0    | 371401 2 0     | 2.20E-06 | 0.00E+00 |
| 19:15179496:A:G   | Exon 21 | EGFr 7-34    | EGFr 28            | c.3328T>C       | p.Cys1110Arg | NC                   | NC       | 4.64E-06 | 3   | 9143 0 0    | 371400 3 0     | 4.40E-06 | 0.00E+00 |
| 19:15179468:C:T   | Exon 21 | EGFr 7-34    | EGFr 28            | c.3356G>A       | p.Cys1119Tyr | 0.36 (0,810.78)      | 7.96E-01 | 7.88E-06 | 6   | 9143 0 0    | 371397 6 0     | 6.60E-06 | 0.00E+00 |
| 19:15179415:A:G   | Exon 21 | EGFr 7-34    | EGFr 29            | c.3409T>C       | p.Cys1137Arg | NC                   | NC       | 1.16E-06 | 1   | 9143 0 0    | 371401 1 0     | 1.10E-06 | 0.00E+00 |
| 19:15179397:G:A   | Exon 21 | EGFr 7-34    | EGFr 29            | c.3427C>T       | p.Arg1143Cys | 2.85 (0.9,9.04)      | 7.59E-02 | 1.60E-04 | 122 | 9137 6 0    | 371287 116 0   | 1.46E-04 | 0.00E+00 |
| 19:15179393:T:C   | Exon 21 | EGFr 7-34    | EGFr 29            | c.3431A>G       | p.Tyr1144Cys | NC                   | NC       | 2.32E-06 | 2   | 9143 0 0    | 371401 2 0     | 2.20E-06 | 0.00E+00 |
| 19:15179381:C:A   | Exon 21 | EGFr 7-34    | EGFr 29            | c.3443G>T       | p.Cys1148Phe | NC                   | NC       | 1.16E-06 | 1   | 9143 0 0    | 371402 1 0     | 1.10E-06 | 6.26E-06 |
| 19:15179274:A:G   | Exon 22 | EGFr 7-34    | EGFr 29            | c.3469T>C       | p.Cys1157Arg | NC                   | NC       | 1.16E-06 | 1   | 9143 0 0    | 371402 1 0     | 1.10E-06 | 0.00E+00 |
| 19:15179250:C:A   | Exon 22 | EGFr 7-34    | EGFr 30            | c.3493G>T       | p.Gly1165Cys | NC                   | NC       | 3.48E-06 | 3   | 9143 0 0    | 371377 3 0     | 3.30E-06 | 0.00E+00 |
| 19:15179216:C:T   | Exon 22 | EGFr 7-34    | EGFr 30            | c.3527G>A       | p.Cys1176Tyr | NC                   | NC       | 1.16E-06 | 1   | 9143 0 0    | 371402 1 0     | 1.10E-06 | 0.00E+00 |
| 19:15179197:G:C   | Exon 22 | EGFr 7-34    | EGFr 30            | c.3546C>G       | p.Cys1182Trp | NC                   | NC       | 1.16E-06 | 1   | 9143 0 0    | 371386 1 0     | 1.10E-06 | 0.00E+00 |
| 19:15179175:G:A   | Exon 22 | EGFr 7-34    | EGFr 30            | c.3568C>T       | p.Arg1190Cys | 0.36 (0.01,9.43)     | 5.36E-01 | 1.97E-05 | 15  | 9143 0 0    | 371388 15 0    | 2.31E-05 | 1.31E-04 |
| 19:15179165:C:T   | Exon 22 | EGFr 7-34    | EGFr 30            | c.3578G>A       | p.Cys1193Tyr | NC                   | NC       | 1.16E-06 | 1   | 9143 0 0    | 371402 1 0     | 1.10E-06 | 0.00E+00 |

| Chrom:pos:ref:alt | Exon    | Domain class | EGFr Domain number | HGVS transcript | HGVS protein | Odds Ratio (95 % CI) | Pval     | AAF      | AAC | Case Counts | Control Counts | UKB AAF  | PGR AAF  |
|-------------------|---------|--------------|--------------------|-----------------|--------------|----------------------|----------|----------|-----|-------------|----------------|----------|----------|
| 19:15179142:G:A   | Exon 22 | EGFr 7-34    | EGFr 30            | c.3601C>T       | p.Arg1201Cys | 0.36 (0.04,3.3)      | 3.64E-01 | 5.26E-05 | 40  | 9143 0 0    | 371363 40 0    | 5.72E-05 | 6.26E-06 |
| 19:15179115:G:A   | Exon 22 | EGFr 7-34    | EGFr 31            | c.3628C>T       | p.Arg1210Cys | NC                   | NC       | 3.48E-06 | 3   | 9142 1 0    | 371401 2 0     | 3.30E-06 | 6.26E-06 |
| 19:15179079:A:C   | Exon 22 | EGFr 7-34    | EGFr 31            | c.3664T>G       | p.Cys1222Gly | 2.3 (1.13,4.68)      | 2.15E-02 | 2.46E-04 | 187 | 9133 10 0   | 371225 177 0   | 2.31E-04 | 0.00E+00 |
| 19:15179079:A:G   | Exon 22 | EGFr 7-34    | EGFr 31            | c.3664T>C       | p.Cys1222Arg | NC                   | NC       | 1.16E-06 | 1   | 9133 0 0    | 371225 1 0     | 1.10E-06 | 0.00E+00 |
| 19:15179052:G:A   | Exon 22 | EGFr 7-34    | EGFr 31            | c.3691C>T       | p.Arg1231Cys | 3.38 (1.65,6.94)     | 8.80E-04 | 1.97E-04 | 150 | 9124 11 0   | 370986 139 0   | 2.81E-04 | 5.34E-03 |
| 19:15178936:G:A   | Exon 23 | EGFr 7-34    | EGFr 31            | c.3724C>T       | p.Arg1242Cys | 34.42 (0.59,2022.49) | 8.86E-02 | 1.45E-05 | 10  | 9142 1 0    | 371394 8 1     | 1.21E-05 | 6.26E-06 |
| 19:15178877:G:C   | Exon 23 | EGFr 7-34    | EGFr 32            | c.3783C>G       | p.Cys1261Trp | NC                   | NC       | 1.16E-06 | 1   | 9143 0 0    | 371402 1 0     | 1.10E-06 | 0.00E+00 |
| 19:15178836:C:G   | Exon 23 | EGFr 7-34    | EGFr 32            | c.3824G>C       | p.Cys1275Ser | NC                   | NC       | 1.16E-06 | 1   | 9142 1 0    | 371403 0 0     | 1.10E-06 | 0.00E+00 |
| 19:15178081:C:A   | Exon 24 | EGFr 7-34    | EGFr 32            | c.3847G>T       | p.Gly1283Cys | NC                   | NC       | 1.16E-06 | 1   | 9143 0 0    | 371402 1 0     | 1.10E-06 | 0.00E+00 |
| 19:15178057:G:A   | Exon 24 | EGFr 7-34    | EGFr 33            | c.3871C>T       | p.Arg1291Cys | NC                   | NC       | 2.32E-06 | 1   | 9142 1 0    | 371402 0 0     | 2.20E-06 | 0.00E+00 |
| 19:15178050:C:A   | Exon 24 | EGFr 7-34    | EGFr 33            | c.3878G>T       | p.Cys1293Phe | NC                   | NC       | 1.16E-06 | 1   | 9143 0 0    | 371402 1 0     | 1.10E-06 | 0.00E+00 |
| 19:15177990:C:G   | Exon 24 | EGFr 7-34    | EGFr 33            | c.3938G>C       | p.Cys1313Ser | NC                   | NC       | 1.16E-06 | 1   | 9143 0 0    | 371402 1 0     | 1.10E-06 | 0.00E+00 |
| 19:15177984:C:A   | Exon 24 | EGFr 7-34    | EGFr 33            | c.3944G>T       | p.Cys1315Phe | 13.5 (2.14,85.31)    | 5.67E-03 | 1.31E-05 | 10  | 9141 2 0    | 371395 8 0     | 1.10E-05 | 0.00E+00 |
| 19:15177983:G:C   | Exon 24 | EGFr 7-34    | EGFr 33            | c.3945C>G       | p.Cys1315Trp | NC                   | NC       | 1.16E-06 | 1   | 9143 0 0    | 371402 1 0     | 1.10E-06 | 0.00E+00 |
| 19:15177958:A:T   | Exon 24 | EGFr 7-34    | EGFr 33            | c.3970T>A       | p.Cys1324Ser | NC                   | NC       | 2.32E-06 | 2   | 9143 0 0    | 371401 2 0     | 2.20E-06 | 0.00E+00 |
| 19:15177957:C:T   | Exon 24 | EGFr 7-34    | EGFr 33            | c.3971G>A       | p.Cys1324Tyr | NC                   | NC       | 1.16E-06 | 1   | 9143 0 0    | 371402 1 0     | 1.10E-06 | 0.00E+00 |
| 19:15177850:G:A   | Exon 24 | EGFr 7-34    | EGFr 34            | c.4078C>T       | p.Arg1360Cys | NC                   | NC       | 1.16E-06 | 1   | 9143 0 0    | 371402 1 0     | 1.10E-06 | 6.26E-06 |
| 19:15177812:G:C   | Exon 24 | EGFr 7-34    | EGFr 34            | c.4116C>G       | p.Cys1372Trp | NC                   | NC       | 1.16E-06 | 1   | 9143 0 0    | 371402 1 0     | 1.10E-06 | 0.00E+00 |
| 19:15177763:G:A   | Exon 24 | No EGFr      | No EGFr domain     | c.4165C>T       | p.Arg1389Cys | 0.35 (0.02,7.94)     | 5.11E-01 | 1.84E-05 | 14  | 9143 0 0    | 371388 14 0    | 1.98E-05 | 0.00E+00 |
| 19:15177727:A:C   | Exon 24 | No EGFr      | No EGFr domain     | c.4201T>G       | p.Cys1401Gly | NC                   | NC       | 3.48E-06 | 2   | 9143 0 0    | 371401 2 0     | 3.30E-06 | 0.00E+00 |
| 19:15177697:C:A   | Exon 24 | No EGFr      | No EGFr domain     | c.4231G>T       | p.Gly1411Cys | NC                   | NC       | 1.16E-06 | 1   | 9143 0 0    | 371401 1 0     | 1.10E-06 | 0.00E+00 |
| 19:15174368:A:C   | Exon 25 | No EGFr      | No EGFr domain     | c.4436T>G       | p.Phe1479Cys | NC                   | NC       | 3.48E-06 | 3   | 9143 0 0    | 371400 3 0     | 3.30E-06 | 0.00E+00 |
| 19:15174357:G:A   | Exon 25 | No EGFr      | No EGFr domain     | c.4447C>T       | p.Arg1483Cys | 0.36 (0.01,19.71)    | 6.15E-01 | 1.97E-05 | 15  | 9143 0 0    | 371388 15 0    | 1.87E-05 | 0.00E+00 |
| 19:15174300:T:A   | Exon 25 | No EGFr      | No EGFr domain     | c.4504A>T       | p.Ser1502Cys | NC                   | NC       | 1.16E-06 | 1   | 9143 0 0    | 371402 1 0     | 1.10E-06 | 0.00E+00 |
| 19:15174228:G:A   | Exon 25 | No EGFr      | No EGFr domain     | c.4576C>T       | p.Arg1526Cys | NC                   | NC       | 1.16E-06 | 1   | 9143 0 0    | 371402 1 0     | 1.10E-06 | 0.00E+00 |
| 19:15174224:G:C   | Exon 25 | No EGFr      | No EGFr domain     | c.4580C>G       | p.Ser1527Cys | NC                   | NC       | 2.32E-06 | 2   | 9143 0 0    | 371401 2 0     | 2.20E-06 | 0.00E+00 |
| 19:15174168:G:A   | Exon 25 | No EGFr      | No EGFr domain     | c.4636C>T       | p.Arg1546Cys | 1.77 (0.15,21.26)    | 6.54E-01 | 3.68E-05 | 28  | 9142 1 0    | 371376 27 0    | 3.30E-05 | 0.00E+00 |

| Chrom:pos:ref:alt | Exon    | Domain class | EGFr Domain number | HGVS transcript | HGVS protein | Odds Ratio (95 % CI) | Pval     | AAF      | AAC | Case Counts | Control Counts | UKB AAF  | PGR AAF  |
|-------------------|---------|--------------|--------------------|-----------------|--------------|----------------------|----------|----------|-----|-------------|----------------|----------|----------|
| 19:15174153:C:A   | Exon 25 | No EGFr      | No EGFr domain     | c.4651G>T       | p.Gly1551Cys | NC                   | NC       | 1.16E-06 | 1   | 9143 0 0    | 371402 1 0     | 1.10E-06 | 0.00E+00 |
| 19:15174096:G:A   | Exon 25 | No EGFr      | No EGFr domain     | c.4708C>T       | p.Arg1570Cys | 0.35 (0,47.28)       | 6.77E-01 | 7.88E-06 | 6   | 9143 0 0    | 371397 6 0     | 8.80E-06 | 0.00E+00 |
| 19:15170707:G:A   | Exon 26 | No EGFr      | No EGFr domain     | c.4855C>T       | p.Arg1619Cys | NC                   | NC       | 1.16E-06 | 1   | 9143 0 0    | 371401 1 0     | 1.10E-06 | 0.00E+00 |
| 19:15167371:C:T   | Exon 29 | No EGFr      | No EGFr domain     | c.5240G>A       | p.Cys1747Tyr | NC                   | NC       | 3.48E-06 | 1   | 9143 0 0    | 371402 1 0     | 4.40E-06 | 0.00E+00 |
| 19:15167369:G:A   | Exon 29 | No EGFr      | No EGFr domain     | c.5242C>T       | p.Arg1748Cys | 0.35 (0.01,10.69)    | 5.48E-01 | 2.89E-05 | 22  | 9143 0 0    | 371381 22 0    | 3.63E-05 | 6.26E-06 |
| 19:15167330:G:A   | Exon 29 | No EGFr      | No EGFr domain     | c.5281C>T       | p.Arg1761Cys | 0.35 (0,27)          | 6.35E-01 | 9.28E-06 | 7   | 9143 0 0    | 371396 7 0     | 8.80E-06 | 6.26E-06 |
| 19:15167258:G:A   | Exon 29 | No EGFr      | No EGFr domain     | c.5353C>T       | p.Arg1785Cys | 0.34 (0,31.47)       | 6.40E-01 | 9.20E-06 | 7   | 9143 0 0    | 371396 7 0     | 1.10E-05 | 6.26E-06 |
| 19:15166058:C:T   | Exon 30 | No EGFr      | No EGFr domain     | c.5396G>A       | p.Cys1799Tyr | 0.36 (0.01,11.04)    | 5.55E-01 | 1.97E-05 | 15  | 9143 0 0    | 371388 15 0    | 1.98E-05 | 0.00E+00 |
| 19:15165945:G:A   | Exon 30 | No EGFr      | No EGFr domain     | c.5509C>T       | p.Arg1837Cys | 0.36 (0,320.69)      | 7.68E-01 | 6.57E-06 | 5   | 9143 0 0    | 371372 5 0     | 8.80E-06 | 4.38E-05 |
| 19:15165912:G:A   | Exon 30 | No EGFr      | No EGFr domain     | c.5542C>T       | p.Arg1848Cys | NC                   | NC       | 1.16E-06 | 1   | 9143 0 0    | 371402 1 0     | 1.10E-06 | 0.00E+00 |
| 19:15165903:G:A   | Exon 30 | No EGFr      | No EGFr domain     | c.5551C>T       | p.Arg1851Cys | NC                   | NC       | 1.16E-06 | 1   | 9143 0 0    | 371401 1 0     | 1.10E-06 | 6.26E-06 |
| 19:15165837:G:A   | Exon 30 | No EGFr      | No EGFr domain     | c.5617C>T       | p.Arg1873Cys | 0.36 (0,78)          | 7.07E-01 | 5.80E-06 | 5   | 9143 0 0    | 371398 5 0     | 5.50E-06 | 6.26E-06 |
| 19:15165500:G:A   | Exon 31 | No EGFr      | No EGFr domain     | c.5683C>T       | p.Arg1895Cys | 0.35 (0.01,14.7)     | 5.82E-01 | 1.31E-05 | 10  | 9143 0 0    | 371393 10 0    | 1.10E-05 | 6.26E-06 |
| 19:15165479:G:A   | Exon 31 | No EGFr      | No EGFr domain     | c.5704C>T       | p.Arg1902Cys | 11.2 (2.37,52.89)    | 2.28E-03 | 1.97E-05 | 15  | 9140 3 0    | 371391 12 0    | 2.42E-05 | 5.00E-05 |
| 19:15165440:G:A   | Exon 31 | No EGFr      | No EGFr domain     | c.5743C>T       | p.Arg1915Cys | NC                   | NC       | 3.48E-06 | 3   | 9143 0 0    | 371400 3 0     | 3.30E-06 | 6.26E-06 |
| 19:15161674:T:C   | Exon 33 | No EGFr      | No EGFr domain     | c.5954A>G       | p.Tyr1985Cys | 0.35 (0.02,5.38)     | 4.54E-01 | 3.28E-05 | 25  | 9143 0 0    | 371377 25 0    | 3.08E-05 | 4.38E-05 |
| 19:15161564:G:A   | Exon 33 | No EGFr      | No EGFr domain     | c.6064C>T       | p.Arg2022Cys | NC                   | NC       | 1.16E-06 | 1   | 9143 0 0    | 371401 1 0     | 2.20E-06 | 6.26E-06 |
| 19:15161546:T:A   | Exon 33 | No EGFr      | No EGFr domain     | c.6082A>T       | p.Ser2028Cys | NC                   | NC       | 2.32E-06 | 2   | 9143 0 0    | 371401 2 0     | 2.20E-06 | 0.00E+00 |
| 19:15161537:G:A   | Exon 33 | No EGFr      | No EGFr domain     | c.6091C>T       | p.Arg2031Cys | 5.18 (0.21,128.57)   | 3.16E-01 | 1.97E-05 | 15  | 9142 1 0    | 371389 14 0    | 2.09E-05 | 1.88E-05 |
| 19:15161525:C:A   | Exon 33 | No EGFr      | No EGFr domain     | c.6103G>T       | p.Gly2035Cys | NC                   | NC       | 2.32E-06 | 2   | 9143 0 0    | 371401 2 0     | 2.20E-06 | 1.25E-05 |
| 19:15161365:C:A   | Exon 33 | No EGFr      | No EGFr domain     | c.6263G>T       | p.Cys2088Phe | NC                   | NC       | 1.16E-06 | 1   | 9143 0 0    | 371402 1 0     | 1.10E-06 | 0.00E+00 |
| 19:15161248:T:C   | Exon 33 | No EGFr      | No EGFr domain     | c.6380A>G       | p.Tyr2127Cys | NC                   | NC       | 1.16E-06 | 1   | 9143 0 0    | 371402 1 0     | 2.20E-06 | 1.25E-05 |
| 19:15161221:G:C   | Exon 33 | No EGFr      | No EGFr domain     | c.6407C>G       | p.Ser2136Cys | NC                   | NC       | 3.48E-06 | 3   | 9142 1 0    | 371401 2 0     | 3.30E-06 | 0.00E+00 |
| 19:15161207:C:A   | Exon 33 | No EGFr      | No EGFr domain     | c.6421G>T       | p.Gly2141Cys | NC                   | NC       | 1.16E-06 | 1   | 9143 0 0    | 371402 1 0     | 1.10E-06 | 0.00E+00 |
| 19:15161180:G:A   | Exon 33 | No EGFr      | No EGFr domain     | c.6448C>T       | p.Arg2150Cys | 0.36 (0,34.1)        | 6.58E-01 | 1.58E-05 | 12  | 9143 0 0    | 371391 12 0    | 1.32E-05 | 3.75E-05 |
| 19:15160928:G:A   | Exon 33 | No EGFr      | No EGFr domain     | c.6700C>T       | p.Arg2234Cys | 0.67 (0.14,3.23)     | 6.20E-01 | 8.93E-05 | 68  | 9142 1 0    | 371336 67 0    | 8.25E-05 | 7.51E-05 |
| 19:15160830:C:G   | Exon 33 | No EGFr      | No EGFr domain     | c.6798G>C       | p.Trp2266Cys | NC                   | NC       | 1.16E-06 | 1   | 9143 0 0    | 371402 1 0     | 1.10E-06 | 0.00E+00 |

- <sup>1</sup>. To test the combined signal of association of rare *NOTCH3* Cys-altering variants with ischemic stroke in the UKB European population, individual variant data was combined into a burden test. Shown is a table of all Cys-altering variants in *NOTCH3* that were observed in UKB Europeans, including variant functional information, and single variant association summary statistics for variants with alternate allele count (AAC)  $\geq 5$ . From left-to-right is variant location (in chromosome:position:reference:alternate format with GRCh38 coordinates); exon number; EGFr domain class in *NOTCH3* (1-6, 7-34, or no EGFr domains); specific EGFr number; impact on ENST00000263388 transcript; impact on the protein sequence; single variant analysis effect size (with 95% confidence interval in parenthesis); single variant analysis p value; alternate variant allele frequency; alternate variant allele count; number of cases (organized by Ref/Ref homozygotes | Ref/Alt heterozygotes | Alt/Alt homozygotes); number of controls; alternate allele frequency in the full UKB 450 K cohort across ancestries; and alternate allele frequency in the full 75 K PGR cohort. “NC” stands for “Not Calculated”, meaning that the case and control counts of the variant was insufficient to calculate a single variant analysis p value and effect size. Table is ordered from start to end of transcript.

**Supplementary Table 23. Comparison of Cys-altering and Ser-altering Variants in *NOTCH3* EGFr domains in UKB<sup>1</sup>.**

| Domain       | Covariate            | Variant group | Phenotype       | Odds ratio (CI)     | Pval     | AAF      | Case       | Control       | Case (n) | Control (n) |
|--------------|----------------------|---------------|-----------------|---------------------|----------|----------|------------|---------------|----------|-------------|
|              |                      |               |                 |                     |          |          | (RR RA AA) | (RR RA AA)    |          |             |
| EGFr 1 to 34 | Standard             | Cys-alt       | Ischemic stroke | 2.86 (2.14,3.82)    | 6.29E-10 | 9.99E-04 | 9094 49 0  | 370693 709 1  | 9,143    | 371,403     |
| EGFr 1 to 34 | Standard+Smoking     | Cys-alt       | Ischemic stroke | 2.82 (2.11,3.78)    | 1.40E-09 | 9.99E-04 | 9034 48 0  | 369103 707 1  | 9,082    | 369,811     |
| EGFr 1 to 34 | Standard+Smoking+HTN | Cys-alt       | Ischemic stroke | 2.72 (2,3.71)       | 2.91E-08 | 1.00E-03 | 8298 43 0  | 287673 551 1  | 8,341    | 288,225     |
| EGFr 1 to 6  | Standard             | Cys-alt       | Ischemic stroke | 29.51 (10.39,83.82) | 1.37E-07 | 1.97E-05 | 9137 6 0   | 371394 9 0    | 9,143    | 371,403     |
| EGFr 1 to 6  | Standard+Smoking     | Cys-alt       | Ischemic stroke | 24.62 (8.18,74.11)  | 2.74E-06 | 1.85E-05 | 9077 5 0   | 369802 9 0    | 9,082    | 369,811     |
| EGFr 1 to 6  | Standard+Smoking+HTN | Cys-alt       | Ischemic stroke | 26.91 (7.47,96.98)  | 1.83E-05 | 1.69E-05 | 8337 4 0   | 288219 6 0    | 8,341    | 288,225     |
| EGFr 7 to 34 | Standard             | Cys-alt       | Ischemic stroke | 2.55 (1.87,3.46)    | 1.59E-07 | 9.79E-04 | 9100 43 0  | 370702 700 1  | 9,143    | 371,403     |
| EGFr 7 to 34 | Standard+Smoking     | Cys-alt       | Ischemic stroke | 2.56 (1.89,3.49)    | 1.30E-07 | 9.80E-04 | 9039 43 0  | 369112 698 1  | 9,082    | 369,811     |
| EGFr 7 to 34 | Standard+Smoking+HTN | Cys-alt       | Ischemic stroke | 2.5 (1.81,3.45)     | 1.00E-06 | 9.88E-04 | 8302 39 0  | 287679 545 1  | 8,341    | 288,225     |
| Not in EGFr  | Standard             | Cys-alt       | Ischemic stroke | 0.97 (0.46,2.03)    | 9.30E-01 | 3.93E-04 | 9136 7 0   | 371111 292 0  | 9,143    | 371,403     |
| Not in EGFr  | Standard+Smoking     | Cys-alt       | Ischemic stroke | 0.97 (0.46,2.03)    | 9.37E-01 | 3.93E-04 | 9075 7 0   | 369520 291 0  | 9,082    | 369,811     |
| Not in EGFr  | Standard+Smoking+HTN | Cys-alt       | Ischemic stroke | 0.9 (0.42,1.94)     | 7.82E-01 | 4.08E-04 | 8335 6 0   | 287989 236 0  | 8,341    | 288,225     |
| EGFr 1 to 34 | Standard             | Ser-alt       | Ischemic stroke | 0.98 (0.8,1.2)      | 8.35E-01 | 5.45E-03 | 9046 97 0  | 367355 404 6  | 9,143    | 371,403     |
| EGFr 1 to 34 | Standard+Smoking     | Ser-alt       | Ischemic stroke | 0.98 (0.8,1.2)      | 8.68E-01 | 5.45E-03 | 8985 97 0  | 365781 402 6  | 9,082    | 369,811     |
| EGFr 1 to 34 | Standard+Smoking+HTN | Ser-alt       | Ischemic stroke | 1.01 (0.82,1.25)    | 9.20E-01 | 5.46E-03 | 8250 91 0  | 285080 3140 5 | 8,341    | 288,225     |
| EGFr 1 to 6  | Standard             | Ser-alt       | Ischemic stroke | 0.76 (0.23,2.56)    | 6.57E-01 | 1.76E-04 | 9141 2 0   | 371271 132 0  | 9,143    | 371,403     |
| EGFr 1 to 6  | Standard+Smoking     | Ser-alt       | Ischemic stroke | 0.77 (0.23,2.63)    | 6.78E-01 | 1.76E-04 | 9080 2 0   | 369680 131 0  | 9,082    | 369,811     |
| EGFr 1 to 6  | Standard+Smoking+HTN | Ser-alt       | Ischemic stroke | 0.79 (0.22,2.8)     | 7.19E-01 | 1.79E-04 | 8339 2 0   | 288121 104 0  | 8,341    | 288,225     |
| EGFr 7 to 34 | Standard             | Ser-alt       | Ischemic stroke | 0.99 (0.8,1.21)     | 8.89E-01 | 5.28E-03 | 9048 95 0  | 367486 3911 6 | 9,143    | 371,403     |
| EGFr 7 to 34 | Standard+Smoking     | Ser-alt       | Ischemic stroke | 0.99 (0.81,1.22)    | 9.19E-01 | 5.28E-03 | 8987 95 0  | 365911 3894 6 | 9,082    | 369,811     |
| EGFr 7 to 34 | Standard+Smoking+HTN | Ser-alt       | Ischemic stroke | 1.02 (0.82,1.26)    | 8.71E-01 | 5.29E-03 | 8252 89 0  | 285183 3037 5 | 8,341    | 288,225     |
| Not in EGFr  | Standard             | Ser-alt       | Ischemic stroke | 0.84 (0.52,1.34)    | 4.52E-01 | 1.01E-03 | 9128 15 0  | 370656 744 3  | 9,143    | 371,403     |
| Not in EGFr  | Standard+Smoking     | Ser-alt       | Ischemic stroke | 0.85 (0.53,1.37)    | 5.12E-01 | 1.00E-03 | 9067 15 0  | 369069 739 3  | 9,082    | 369,811     |
| Not in EGFr  | Standard+Smoking+HTN | Ser-alt       | Ischemic stroke | 0.9 (0.55,1.46)     | 6.60E-01 | 1.02E-03 | 8326 15 0  | 287635 588 2  | 8,341    | 288,225     |

<sup>1</sup>. To test the hypothesis that all missense variants contribute to the association between *NOTCH3* and stroke, an analysis was conducted to compare the effects of Cys-altering and Ser-altering variants. Serine was selected because it is one of the most common amino acids added or removed in *NOTCH3*, and at *NOTCH3* codon 1231 a second alternate allele introduces an extremely rare Arg->Ser instead of a Arg->Cys



Rodriguez-Flores et al.  
*NOTCH3* p.Arg1231Cys is Markedly Enriched in South Asians and Associated with Stroke  
Version 34  
17 June 2024

missense substitution. Shown in this table from left-to-right is a description of the NOTCH3 domains included in the analysis (EGFr domains 1 to 34, 1 to 6, 7 to 34, or the C-terminal region beyond EGFr 34); covariates included; variant group (Cys-altering or Ser-altering); phenotype; effect size (odds ratio with 95% confidence interval in parenthesis); p value; alternate allele frequency; case genotype counts (RR|RA|AA); case total n; control genotype counts (RR|RA|AA); control total n; and a description of the analysis. Results shown for standard covariates.

**Supplementary Table 24. *NOTCH3* LoF Variants in UKB Included in Burden Test<sup>1</sup>.**

| Chrom:pos:ref:alt   | Exon    | EGFr Domain    | Variant Effect  | HGVS transcript    | HGVS protein | Odds ratio (95% confidence interval) | P value | AAF     | AAC | Cases    | Controls   | UKB 450K | PGR |
|---------------------|---------|----------------|-----------------|--------------------|--------------|--------------------------------------|---------|---------|-----|----------|------------|----------|-----|
| 19:15200905:T:C     | Exon 1  | No EGFr domain | start_lost      | c.1A>G             | p.Met1?      | NC                                   | NC      | 1.1E-06 | 1   | 9082 0 0 | 368695 1 0 | 1.11E-06 | 0   |
| 19:15200904:A:C     | Exon 1  | No EGFr domain | start_lost      | c.2T>G             | p.Met1?      | NC                                   | NC      | 1.1E-06 | 1   | 9084 0 0 | 368727 1 0 | 1.11E-06 | 0   |
| 19:15200903:CA:C    | Exon 1  | No EGFr domain | frameshift      | c.2delT            | p.Met1fs     | NC                                   | NC      | 1.1E-06 | 1   | 9084 0 0 | 368727 1 0 | 1.11E-06 | 0   |
| 19:15200892:GC:G    | Exon 1  | No EGFr domain | frameshift      | c.13delG           | p.Ala5fs     | 13.35 (0.31, 568.42)                 | 0.176   | 7.9E-06 | 6   | 9097 1 0 | 369616 5 0 | 6.63E-06 | 0   |
| 19:15200793:GC:G    | Exon 1  | No EGFr domain | frameshift      | c.112delG          | p.Ala38fs    | 0.35 (0, 33.83)                      | 0.656   | 9.2E-06 | 7   | 9143 0 0 | 371388 7 0 | 7.7E-06  | 0   |
| 19:15197571:A:AG    | Exon 2  | EGFr 1         | frameshift      | c.125dupC          | p.Cys43fs    | NC                                   | NC      | 1.1E-06 | 1   | 9143 0 0 | 371401 1 0 | 1.1E-06  | 0   |
| 19:15192410:G:A     | Exon 3  | EGFr 2         | stop_gained     | c.307C>T           | p.Arg103*    | NC                                   | NC      | 1.1E-06 | 1   | 9142 0 0 | 371402 1 0 | 1.1E-06  | 0   |
| 19:15192380:G:A     | Exon 3  | EGFr 2         | stop_gained     | c.337C>T           | p.Arg113*    | NC                                   | NC      | 2.2E-06 | 2   | 9143 0 0 | 371401 2 0 | 2.2E-06  | 0   |
| 19:15192376:C:G     | Exon 3  | No EGFr domain | splice_donor    | c.340+1G>C         |              | NC                                   | NC      | 1.1E-06 | 1   | 9143 0 0 | 371402 1 0 | 1.1E-06  | 0   |
| 19:15192375:A:G     | NA      | No EGFr domain | splice_donor    | c.340+2T>C         |              | NC                                   | NC      | 1.1E-06 | 1   | 9143 0 0 | 371402 1 0 | 1.1E-06  | 0   |
| 19:15192173:G:A     | Exon 4  | EGFr 3         | stop_gained     | c.466C>T           | p.Arg156*    | NC                                   | NC      | 2.2E-06 | 2   | 9143 0 0 | 371401 2 0 | 2.2E-06  | 0   |
| 19:15191827:A:T     | Exon 5  | EGFr 6         | stop_gained     | c.720T>A           | p.Cys240*    | NC                                   | NC      | 1.1E-06 | 1   | 9143 0 0 | 371402 1 0 | 1.1E-06  | 0   |
| 19:15191817:G:A     | Exon 5  | EGFr 6         | stop_gained     | c.730C>T           | p.Arg244*    | NC                                   | NC      | 2.2E-06 | 2   | 9143 0 0 | 371401 2 0 | 2.2E-06  | 0   |
| 19:15191799:T:TC    | Exon 5  | EGFr 6         | frameshift      | c.747dupG          | p.Thr250fs   | NC                                   | NC      | 1.1E-06 | 1   | 9143 0 0 | 371402 1 0 | 1.1E-06  | 0   |
| 19:15191446:A:T     | Exon 6  | EGFr 8         | stop_gained     | c.1014T>A          | p.Cys338*    | NC                                   | NC      | 1.1E-06 | 1   | 9143 0 0 | 371402 1 0 | 1.1E-06  | 0   |
| 19:15189368:CAGAT:C | Exon 7  | EGFr 9         | frameshift      | c.1093_1096delATCT | p.Ile365fs   | NC                                   | NC      | 1.1E-06 | 1   | 9143 0 0 | 371402 1 0 | 1.1E-06  | 0   |
| 19:15189271:A:T     | NA      | No EGFr domain | splice_donor    | c.1192+2T>A        |              | NC                                   | NC      | 1.1E-06 | 1   | 9143 0 0 | 371402 1 0 | 1.1E-06  | 0   |
| 19:15189013:G:A     | Exon 8  | EGFr 11        | stop_gained     | c.1354C>T          | p.Gln452*    | NC                                   | NC      | 1.1E-06 | 1   | 9143 0 0 | 371401 1 0 | 1.1E-06  | 0   |
| 19:15188349:C:T     | NA      | No EGFr domain | splice_acceptor | c.1379-1G>A        |              | NC                                   | NC      | 1.1E-06 | 1   | 9143 0 0 | 371401 1 0 | 1.1E-06  | 0   |
| 19:15188271:C:CA    | Exon 9  | EGFr 12        | frameshift      | c.1455_1456insT    | p.Asp486fs   | NC                                   | NC      | 2.2E-06 | 2   | 9142 1 0 | 371402 1 0 | 2.2E-06  | 0   |
| 19:15188257:GC:G    | Exon 9  | EGFr 12        | frameshift      | c.1469delG         | p.Gly490fs   | NC                                   | NC      | 1.1E-06 | 1   | 9142 0 0 | 371309 1 0 | 1.1E-06  | 0   |
| 19:15187879:A:C     | NA      | No EGFr domain | splice_donor    | c.1606+2T>G        |              | NC                                   | NC      | 1.1E-06 | 1   | 9142 1 0 | 371403 0 0 | 1.1E-06  | 0   |
| 19:15187245:G:C     | Exon 11 | EGFr 14        | stop_gained     | c.1700C>G          | p.Ser567*    | NC                                   | NC      | 1.1E-06 | 1   | 9143 0 0 | 371402 1 0 | 1.1E-06  | 0   |
| 19:15187104:C:A     | Exon 11 | No EGFr domain | splice_donor    | c.1840+1G>T        |              | NC                                   | NC      | 1.1E-06 | 1   | 9143 0 0 | 371402 1 0 | 1.1E-06  | 0   |
| 19:15186893:G:A     | Exon 12 | EGFr 16        | stop_gained     | c.1936C>T          | p.Gln646*    | NC                                   | NC      | 1.1E-06 | 1   | 9143 0 0 | 371402 1 0 | 1.1E-06  | 0   |
| 19:15185681:T:G     | NA      | No EGFr domain | splice_acceptor | c.1952-2A>C        |              | NC                                   | NC      | 1.1E-06 | 1   | 9143 0 0 | 371402 1 0 | 1.1E-06  | 0   |

| Chrom:pos:ref:alt             | Exon    | EGFr Domain    | Variant Effect  | HGVS transcript              | HGVS protein | Odds ratio (95% confidence interval) | P value | AAF     | AAC | Cases    | Controls    | UKB 450K | PGR |
|-------------------------------|---------|----------------|-----------------|------------------------------|--------------|--------------------------------------|---------|---------|-----|----------|-------------|----------|-----|
| 19:15185568:A:T               | Exon 13 | EGFr 17        | stop_gained     | c.2063T>A                    | p.Leu688*    | NC                                   | NC      | 1.1E-06 | 1   | 9143 0 0 | 371399 1 0  | 1.1E-06  | 0   |
| 19:15185501:A:T               | Exon 13 | EGFr 18        | stop_gained     | c.2130T>A                    | p.Tyr710*    | NC                                   | NC      | 5.5E-06 | 3   | 9143 0 0 | 371399 3 0  | 5.5E-06  | 0   |
| 19:15185375:GC:G              | Exon 14 | EGFr 18        | frameshift      | c.2177delG                   | p.Gly726fs   | NC                                   | NC      | 2.2E-06 | 2   | 9143 0 0 | 371401 2 0  | 2.2E-06  | 0   |
| 19:15185350:G:A               | Exon 14 | EGFr 19        | stop_gained     | c.2203C>T                    | p.Arg735*    | 0.35 (0.03, 4.93)                    | 0.439   | 3.2E-05 | 24  | 9140 0 0 | 371224 24 0 | 4.4E-06  | 0   |
| 19:15185256:C:T               | Exon 14 | No EGFr domain | splice_donor    | c.2296+1G>A                  |              | NC                                   | NC      | 1.1E-06 | 1   | 9143 0 0 | 371402 1 0  | 1.1E-06  | 0   |
| 19:15184922:G:T               | Exon 15 | EGFr 20        | stop_gained     | c.2394C>A                    | p.Cys798*    | 0.36 (0, 77.63)                      | 0.707   | 6.6E-06 | 5   | 9143 0 0 | 371396 5 0  | 6.6E-06  | 0   |
| 19:15184419:A:T               | Exon 16 | EGFr 21        | stop_gained     | c.2442T>A                    | p.Cys814*    | NC                                   | NC      | 1.1E-06 | 1   | 9143 0 0 | 371402 1 0  | 1.1E-06  | 0   |
| 19:15184382:TG:T              | Exon 16 | EGFr 21        | frameshift      | c.2478delC                   | p.Cys826fs   | NC                                   | NC      | 1.1E-06 | 1   | 9143 0 0 | 371402 1 0  | 1.1E-06  | 0   |
| 19:15184367:TC:T              | Exon 16 | EGFr 21        | frameshift      | c.2493delG                   | p.Ser832fs   | NC                                   | NC      | 4.4E-06 | 2   | 9143 0 0 | 371401 2 0  | 4.4E-06  | 0   |
| 19:15184356:GC:G              | Exon 16 | EGFr 21        | frameshift      | c.2504delG                   | p.Cys835fs   | NC                                   | NC      | 2.2E-06 | 2   | 9143 0 0 | 371401 2 0  | 2.2E-06  | 0   |
| 19:15181668:G:GGT             | Exon 17 | EGFr 23        | frameshift      | c.2698_2699dupAC             | p.Cys901fs   | NC                                   | NC      | 1.1E-06 | 1   | 9143 0 0 | 371402 1 0  | 1.1E-06  | 0   |
| 19:15181577:T:TG              | Exon 17 | EGFr 24        | frameshift      | c.2790dupC                   | p.Ser931fs   | NC                                   | NC      | 2.2E-06 | 1   | 9143 0 0 | 371402 1 0  | 2.2E-06  | 0   |
| 19:15181575:C:T               | Exon 17 | No EGFr domain | splice_donor    | c.2792+1G>A                  |              | NC                                   | NC      | 5.5E-06 | 5   | 9143 0 0 | 371398 5 0  | 5.5E-06  | 0   |
| 19:15181164:T:C               | NA      | No EGFr domain | splice_acceptor | c.2793-2A>G                  |              | 0.36 (0, 41.93)                      | 0.673   | 1.5E-05 | 11  | 9143 0 0 | 371392 11 0 | 1.54E-05 | 0   |
| 19:15180973:GC:G              | Exon 18 | EGFr 25        | frameshift      | c.2981delG                   | p.Gly994fs   | NC                                   | NC      | 2.2E-06 | 2   | 9143 0 0 | 371386 2 0  | 2.2E-06  | 0   |
| 19:15180970:C:CACCCGGCCCGTGAA | Exon 18 | EGFr 25        | frameshift      | c.2984_2985insTTCACGGGCCGGGT | p.Gln996fs   | NC                                   | NC      | 1.1E-06 | 1   | 9143 0 0 | 371399 1 0  | 1.1E-06  | 0   |
| 19:15180970:CG:C              | Exon 18 | EGFr 25        | frameshift      | c.2984delC                   | p.Pro995fs   | NC                                   | NC      | 1.1E-06 | 1   | 9143 0 0 | 371399 1 0  | 1.1E-06  | 0   |
| 19:15180703:G:T               | Exon 19 | EGFr 27        | stop_gained     | c.3120C>A                    | p.Cys1040*   | NC                                   | NC      | 1.1E-06 | 1   | 9141 1 0 | 371394 0 0  | 1.1E-06  | 0   |
| 19:15180084:G:GC              | Exon 20 | EGFr 28        | frameshift      | c.3314dupG                   | p.Tyr1106fs  | NC                                   | NC      | 4.4E-06 | 3   | 9143 0 0 | 371399 3 0  | 4.4E-06  | 0   |
| 19:15180075:A:T               | Exon 20 | EGFr 28        | stop_gained     | c.3324T>A                    | p.Cys1108*   | NC                                   | NC      | 1.1E-06 | 1   | 9143 0 0 | 371402 1 0  | 1.1E-06  | 0   |
| 19:15180070:A:C               | NA      | No EGFr domain | splice_donor    | c.3327+2T>G                  |              | NC                                   | NC      | 1.1E-06 | 1   | 9143 0 0 | 371402 1 0  | 1.1E-06  | 0   |
| 19:15179456:ACG:A             | Exon 21 | EGFr 29        | frameshift      | c.3366_3367delCG             | p.Val1123fs  | NC                                   | NC      | 1.1E-06 | 1   | 9143 0 0 | 371401 1 0  | 1.1E-06  | 0   |
| 19:15179414:CA:C              | Exon 21 | EGFr 29        | frameshift      | c.3409delT                   | p.Cys1137fs  | NC                                   | NC      | 2.2E-06 | 1   | 9143 0 0 | 371401 1 0  | 2.2E-06  | 0   |
| 19:15179228:G:T               | Exon 22 | EGFr 30        | stop_gained     | c.3515C>A                    | p.Ser1172*   | NC                                   | NC      | 1.1E-06 | 1   | 9143 0 0 | 371402 1 0  | 1.1E-06  | 0   |
| 19:15178824:TGGGCACA:T        | Exon 23 | EGFr 32        | frameshift      | c.3829_3835delTGTGCC         | p.Cys1277fs  | NC                                   | NC      | 1.1E-06 | 1   | 9143 0 0 | 371399 1 0  | 1.1E-06  | 0   |
| 19:15178092:T:A               | NA      | No EGFr domain | splice_acceptor | c.3838-2A>T                  |              | NC                                   | NC      | 1.1E-06 | 1   | 9143 0 0 | 371400 1 0  | 1.1E-06  | 0   |
| 19:15177897:CAG:C             | Exon 24 | EGFr 34        | frameshift      | c.4029_4030delCT             | p.Cys1344fs  | NC                                   | NC      | 3.3E-06 | 3   | 9142 1 0 | 371400 2 0  | 3.3E-06  | 0   |

| Chrom:pos:ref:alt            | Exon    | EGFr Domain    | Variant Effect  | HGVS transcript             | HGVS protein | Odds ratio (95% confidence interval) | P value | AAF     | AAC | Cases    | Controls   | UKB 450K | PGR     |
|------------------------------|---------|----------------|-----------------|-----------------------------|--------------|--------------------------------------|---------|---------|-----|----------|------------|----------|---------|
| 19:15177835:G:A              | Exon 24 | EGFr 34        | stop_gained     | c.4093C>T                   | p.Gln1365*   | NC                                   | NC      | 1.1E-06 | 1   | 9143 0 0 | 371402 1 0 | 1.1E-06  | 0       |
| 19:15177752:G:T              | Exon 24 | No EGFr domain | stop_gained     | c.4176C>A                   | p.Cys1392*   | NC                                   | NC      | 1.1E-06 | 1   | 9143 0 0 | 371402 1 0 | 1.1E-06  | 0       |
| 19:15177739:CG:C             | Exon 24 | No EGFr domain | frameshift      | c.4188delC                  | p.Asp1398fs  | NC                                   | NC      | 1.1E-06 | 1   | 9143 0 0 | 371400 1 0 | 1.1E-06  | 0       |
| 19:15177713:G:T              | Exon 24 | No EGFr domain | stop_gained     | c.4215C>A                   | p.Cys1405*   | NC                                   | NC      | 1.1E-06 | 1   | 9143 0 0 | 371402 1 0 | 1.1E-06  | 0       |
| 19:15177655:AG:A             | Exon 24 | No EGFr domain | frameshift      | c.4272delC                  | p.Trp1425fs  | NC                                   | NC      | 1.1E-06 | 1   | 9143 0 0 | 371402 1 0 | 1.1E-06  | 0       |
| 19:15177637:GCGCCTCGCATTGC:G | Exon 24 | No EGFr domain | frameshift      | c.4278_4290delGCAATGCGAGGCG | p.Gln1427fs  | NC                                   | NC      | 6.6E-06 | 5   | 9143 0 0 | 371392 5 0 | 6.6E-06  | 0       |
| 19:15177627:C:T              | Exon 24 | No EGFr domain | stop_gained     | c.4301G>A                   | p.Trp1434*   | NC                                   | NC      | 1.1E-06 | 1   | 9143 0 0 | 371402 1 0 | 1.1E-06  | 0       |
| 19:15174332:TCCGTGTTGCAG:T   | Exon 25 | No EGFr domain | frameshift      | c.4461_4471delCTGCAACACGG   | p.Cys1488fs  | NC                                   | NC      | 1.1E-06 | 1   | 9143 0 0 | 371387 1 0 | 1.1E-06  | 0       |
| 19:15174078:C:A              | Exon 25 | No EGFr domain | stop_gained     | c.4726G>T                   | p.Glu1576*   | NC                                   | NC      | 2.2E-06 | 1   | 9143 0 0 | 371402 1 0 | 2.2E-06  | 0       |
| 19:15170768:A:AT             | Exon 26 | No EGFr domain | frameshift      | c.4793dupA                  | p.Asp1598fs  | NC                                   | NC      | 1.1E-06 | 1   | 9143 0 0 | 371402 1 0 | 1.1E-06  | 0       |
| 19:15170554:C:T              | NA      | No EGFr domain | splice_acceptor | c.4892-1G>A                 |              | NC                                   | NC      | 2.2E-06 | 1   | 9143 0 0 | 371402 1 0 | 2.2E-06  | 0       |
| 19:15170162:GC:G             | Exon 28 | No EGFr domain | frameshift      | c.5122delG                  | p.Ala1708fs  | NC                                   | NC      | 1.1E-06 | 1   | 9143 0 0 | 371401 1 0 | 1.1E-06  | 0       |
| 19:15170139:C:A              | Exon 28 | No EGFr domain | stop_gained     | c.5146G>T                   | p.Glu1716*   | NC                                   | NC      | 1.1E-06 | 1   | 9143 0 0 | 371401 1 0 | 1.1E-06  | 0       |
| 19:15170138:TC:T             | Exon 28 | No EGFr domain | frameshift      | c.5146delG                  | p.Glu1716fs  | NC                                   | NC      | 1.1E-06 | 1   | 9143 0 0 | 371401 1 0 | 1.1E-06  | 0       |
| 19:15170112:C:A              | Exon 28 | No EGFr domain | stop_gained     | c.5173G>T                   | p.Glu1725*   | NC                                   | NC      | 1.1E-06 | 1   | 9143 0 0 | 371402 1 0 | 1.1E-06  | 0       |
| 19:15170103:C:A              | Exon 28 | No EGFr domain | stop_gained     | c.5182G>T                   | p.Glu1728*   | NC                                   | NC      | 3.3E-06 | 2   | 9142 0 0 | 371394 2 0 | 3.3E-06  | 0       |
| 19:15170085:C:T              | Exon 28 | No EGFr domain | splice_donor    | c.5199+1G>A                 |              | NC                                   | NC      | 1.1E-06 | 1   | 9143 0 0 | 371402 1 0 | 1.1E-06  | 0       |
| 19:15167297:G:A              | Exon 29 | No EGFr domain | stop_gained     | c.5314C>T                   | p.Gln1772*   | NC                                   | NC      | 1.1E-06 | 1   | 9142 0 0 | 371400 1 0 | 1.1E-06  | 0       |
| 19:15167248:C:A              | Exon 29 | No EGFr domain | splice_donor    | c.5362+1G>T                 |              | NC                                   | NC      | 1.1E-06 | 1   | 9143 0 0 | 371402 1 0 | 1.1E-06  | 0       |
| 19:15166049:G:GC             | Exon 30 | No EGFr domain | frameshift      | c.5404dupG                  | p.Ala1802fs  | NC                                   | NC      | 2.2E-06 | 2   | 9143 0 0 | 371400 2 0 | 2.2E-06  | 0       |
| 19:15165893:G:GC             | Exon 30 | No EGFr domain | frameshift      | c.5560dupG                  | p.Ala1854fs  | NC                                   | NC      | 1.1E-06 | 1   | 9143 0 0 | 371402 1 0 | 1.1E-06  | 0       |
| 19:15165785:A:C              | NA      | No EGFr domain | splice_donor    | c.5667+2T>G                 |              | NC                                   | NC      | 1.1E-06 | 1   | 9143 0 0 | 371402 1 0 | 1.1E-06  | 0       |
| 19:15165506:G:A              | Exon 31 | No EGFr domain | stop_gained     | c.5677C>T                   | p.Arg1893*   | NC                                   | NC      | 1.1E-06 | 1   | 9143 0 0 | 371402 1 0 | 1.1E-06  | 2.6E-05 |
| 19:15165492:TG:T             | Exon 31 | No EGFr domain | frameshift      | c.5690delC                  | p.Thr1897fs  | NC                                   | NC      | 1.1E-06 | 1   | 9143 0 0 | 371401 1 0 | 1.1E-06  | 0       |
| 19:15162525:G:GTTGT          | Exon 32 | No EGFr domain | frameshift      | c.5849_5852dupACAA          | p.Asn1951fs  | NC                                   | NC      | 1.1E-06 | 1   | 9143 0 0 | 371394 1 0 | 1.1E-06  | 0       |
| 19:15162464:C:T              | Exon 32 | No EGFr domain | splice_donor    | c.5913+1G>A                 |              | NC                                   | NC      | 1.1E-06 | 1   | 9143 0 0 | 371402 1 0 | 1.1E-06  | 0       |
| 19:15161701:A:AG             | Exon 33 | No EGFr domain | frameshift      | c.5926dupC                  | p.Leu1976fs  | 0.36 (0, 447.32)                     | 0.78    | 9.2E-06 | 7   | 9143 0 0 | 371393 7 0 | 8.8E-06  | 0       |

| Chrom:pos:ref:alt | Exon    | EGFr Domain    | Variant Effect | HGVS transcript | HGVS protein      | Odds ratio (95% confidence interval) | P value | AAF     | AAC | Cases    | Controls   | UKB 450K | PGR |
|-------------------|---------|----------------|----------------|-----------------|-------------------|--------------------------------------|---------|---------|-----|----------|------------|----------|-----|
| 19:15161512:AG:A  | Exon 33 | No EGFr domain | frameshift     | c.6115delC      | p.Leu2039fs       | NC                                   | NC      | 1.1E-06 | 1   | 9143 0 0 | 371402 1 0 | 1.1E-06  | 0   |
| 19:15161247:A:C   | Exon 33 | No EGFr domain | stop_gained    | c.6381T>G       | p.Tyr2127*        | NC                                   | NC      | 1.1E-06 | 1   | 9143 0 0 | 371401 1 0 | 1.1E-06  | 0   |
| 19:15161177:G:A   | Exon 33 | No EGFr domain | stop_gained    | c.6451C>T       | p.Gln2151*        | NC                                   | NC      | 1.1E-06 | 1   | 9143 0 0 | 371402 1 0 | 1.1E-06  | 0   |
| 19:15161112:C:T   | Exon 33 | No EGFr domain | stop_gained    | c.6516G>A       | p.Trp2172*        | NC                                   | NC      | 1.1E-06 | 1   | 9143 0 0 | 371402 1 0 | 1.1E-06  | 0   |
| 19:15160951:GC:G  | Exon 33 | No EGFr domain | frameshift     | c.6676delG      | p.Ala2226fs       | NC                                   | NC      | 1.1E-06 | 1   | 9142 0 0 | 371401 1 0 | 1.1E-06  | 0   |
| 19:15160760:G:A   | Exon 33 | No EGFr domain | stop_gained    | c.6868C>T       | p.Gln2290*        | NC                                   | NC      | 2.2E-06 | 1   | 9143 0 0 | 371402 1 0 | 2.2E-06  | 0   |
| 19:15160718:G:A   | Exon 33 | No EGFr domain | stop_gained    | c.6910C>T       | p.Gln2304*        | NC                                   | NC      | 1.1E-06 | 1   | 9143 0 0 | 371402 1 0 | 1.1E-06  | 0   |
| 19:15160694:C:A   | Exon 33 | No EGFr domain | stop_gained    | c.6934G>T       | p.Glu2312*        | NC                                   | NC      | 1.1E-06 | 1   | 9143 0 0 | 371401 1 0 | 1.1E-06  | 0   |
| 19:15160664:A:C   | Exon 33 | No EGFr domain | stop_lost      | c.6964T>G       | p.Ter2322Glyext*? | NC                                   | NC      | 1.1E-06 | 1   | 9143 0 0 | 371402 1 0 | 1.1E-06  | 0   |

<sup>1</sup>. To test the hypothesis that loss of function (LoF) variants in *NOTCH3* do not contribute to stroke risk in the UKB European population, individual LoF variants were combined into a burden test. Shown is a table of all LoF variants in *NOTCH3* that were observed in UKB Europeans, including single variant association summary statistics for variants with alternate allele count (AAC)  $\geq 5$ . From left-to-right is variant location (in chromosome:position:reference:alternate format with GRCh38 coordinates); the exon in the canonical ENST00000263388 transcript; specific EGFr domain number; impact on ENST00000263388 transcript; impact on the protein sequence; single variant analysis effect size (odds ratio with 95% confidence interval in parenthesis); single variant analysis p value; alternate variant allele frequency; alternate variant allele count; number of cases (organized by Ref/Ref homozygotes | Ref/Alt heterozygotes | Alt/Alt homozygotes); number of controls; alternate allele frequency in the full UKB 450 K cohort across ancestries; alternate allele frequency for the variant in 75 K PGR cohort. “NC” stands for “Not Calculated”, meaning that the case and control counts of the variant was insufficient to calculate a single variant analysis p value and effect size. “NA” stands for “not applicable”. Table is ordered from start to end of transcript.

### Supplementary Figures

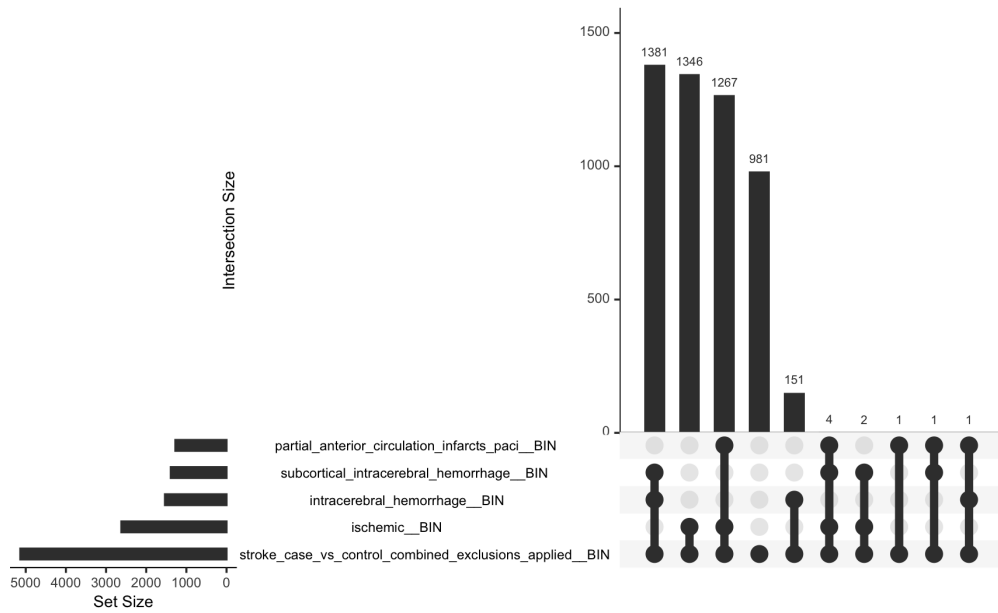

#### Supplementary Figure 1. Overlap between Cases across 5 Stroke Phenotypes in PGR Discovery Cohort.

ExWAS was conducted for 5 stroke phenotypes, including the all-inclusive “stroke” (n = 5,135 cases) and 4 sub-phenotypes whose cases are subsets of the “stroke” cases”. While all sub-phenotype cases are subsets of the “stroke” meta-phenotype, there was some overlap between cases for the 4 sub-phenotypes. To visualize the extent of overlap between stroke and 4 sub-phenotypes, a UpSetR plot was generated. At the bottom left is a bar plot illustrating the sample size of each of the 5 stroke case phenotypes ordered from smallest to largest sample size (stroke, ischemic, intracerebral hemorrhage, subcortical intracerebral hemorrhage, PACI). In the bottom right are horizontal lines, where each line represents one intersecting set between two or more sets, with a filled black circle showing presence of the phenotype (row) in the overlapping set and an unfilled grey circle showing non-presence in the intersection set. On top of each intersection line is a bar plot of the intersection size, ordered from left to right from largest to smallest.

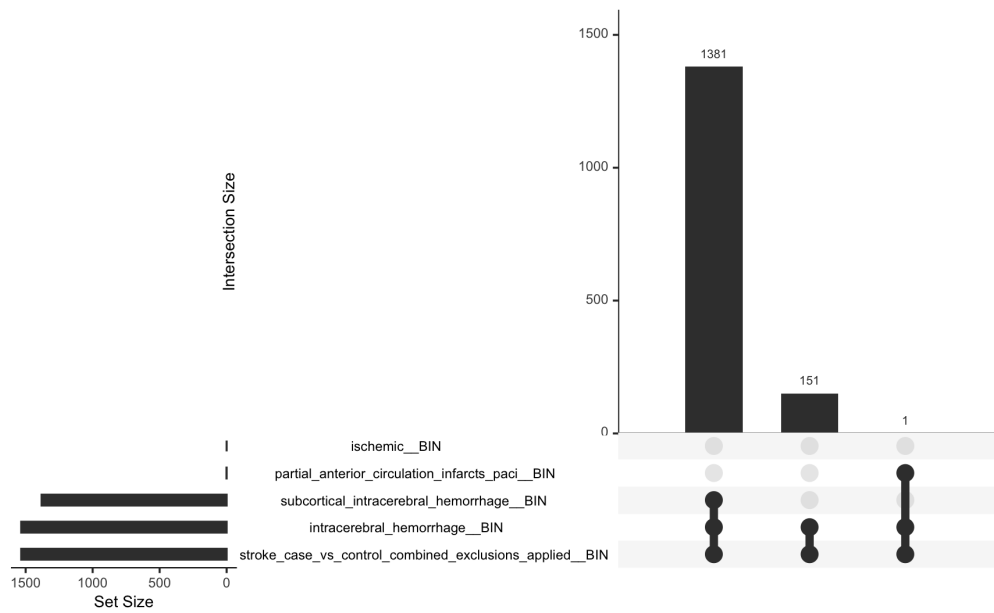

**Supplementary Figure 2. Overlap between Subcortical Stroke Cases across 5 Stroke Sub-Phenotypes in PGR Discovery Cohort.** To visualize the extent of overlap between subcortical stroke cases (n = 1,388) and 4 other stroke sub-phenotypes (including the meta-phenotype “stroke” of which all 4 sub-phenotypes, including subcortical stroke, are subsets of), an UpSetR plot was generated. At the bottom left is a bar plot illustrating the sample size of each of the 5 stroke case sub-phenotypes ordered from smallest to largest overlap sample size. In the bottom right are horizontal lines, where each line represents one intersection set between two or more sets, with a filled black circle showing presence of the phenotype (row) in the overlapping set and an unfilled grey circle showing non-presence in the intersection set. On top of each intersection line is a bar plot of the intersection size, ordered from left to right from largest to smallest.

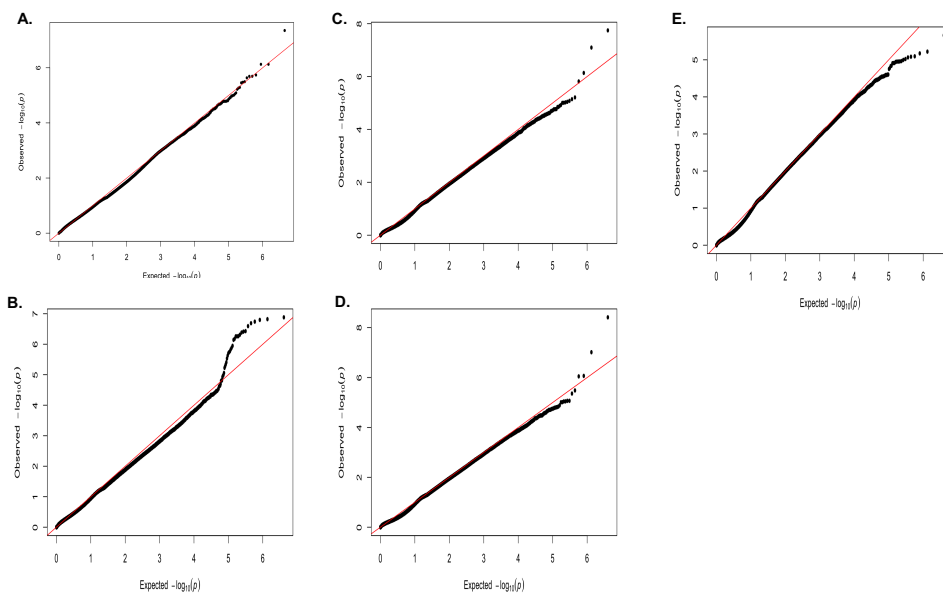

**Supplementary Figure 3. QQ Plots of 5 Stroke ExWASes in PGR Discovery Cohort.** Plot compares observed (y-axis) to expected (x-axis) ExWAS likelihood ratio test  $-\log_{10}$  p-values calculated using REGENIE for  $n=5,135$  stroke cases and  $n=26,602$  controls. **A.** Stroke; **B.** Ischemic; **C.** Hemorrhagic; **D.** Subcortical, **E.** PACI.



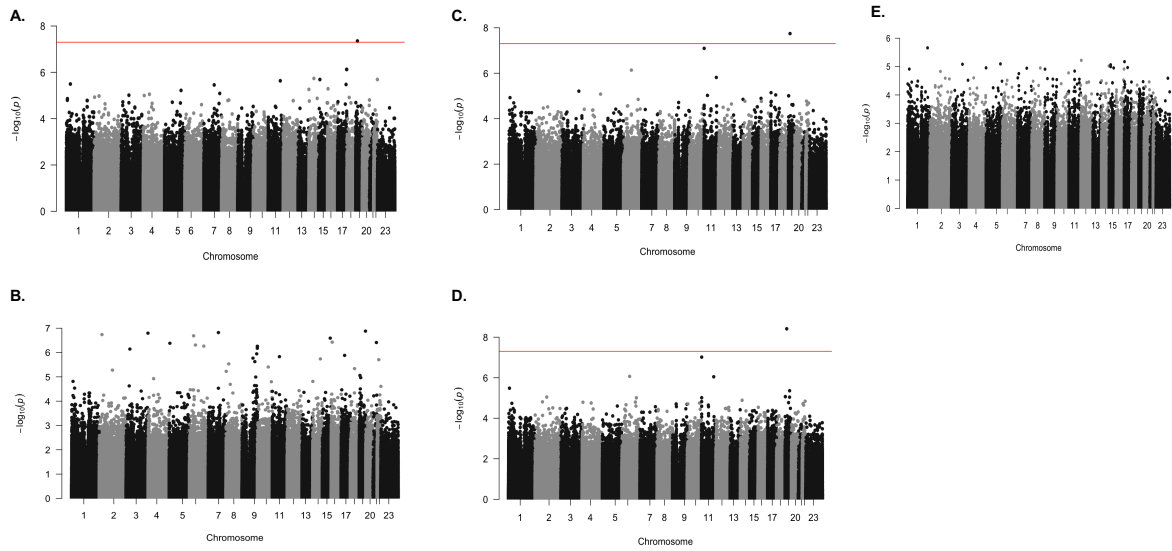

**Supplementary Figure 4. Manhattan Plots of 5 Stroke ExWASes in PGR Discovery Cohort.** Plot shows the ExWAS likelihood ratio test  $-\log_{10} p$  values calculated using REGENIE for  $n=5,135$  stroke cases and  $n=26,602$  controls (y-axis) versus the position in the genome (x-axis). Alternating colors by chromosome from 1 to 23 (ChrX), with a dotted horizontal line showing the genome-wide significance threshold of  $5.0 \times 10^{-8}$  for ExWASes where at least one variant had a  $-\log_{10} p$  value above threshold. **A.** Stroke; **B.** Ischemic; **C.** Hemorrhagic; **D.** Subcortical, **E.** PACI.

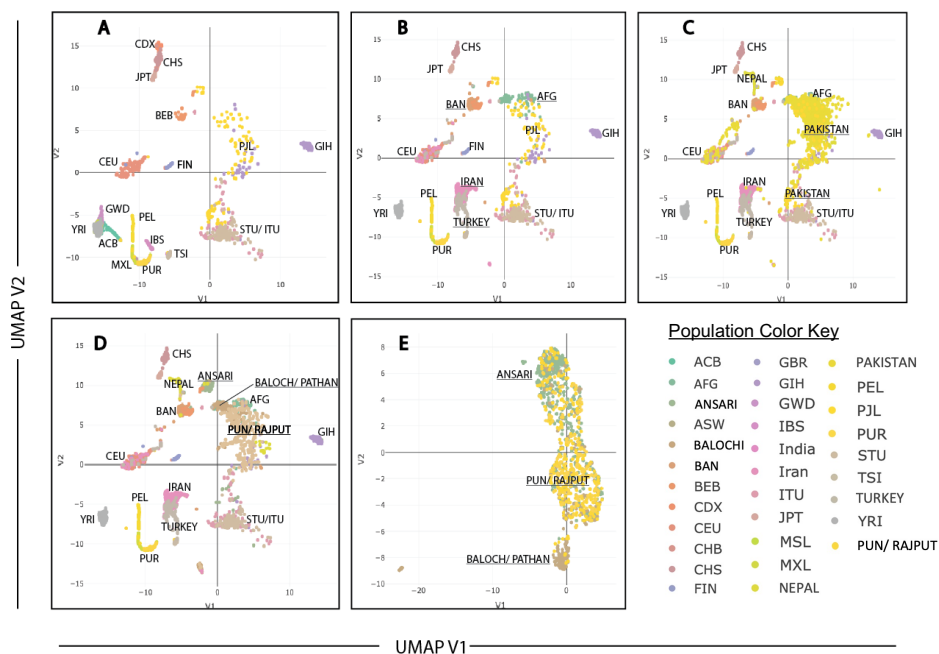

**Supplementary Figure 5. Population Structure of Pakistan** This plot was created using first seven principal components (PCs) computed using genome-wide SNV data from PGR, 1000G and UKB. UMAP is a dimensional reduction technique that can be used to view complex data in two-dimensional space. In this plot the x-axis represents the first dimension and y-axis the second dimension of UMAP. UMAP plot for CNCD data formed three major clusters that were enriched with individuals identifying as Ansari, Punjabi/Rajput and Balochi/Pathan ancestries. **A.** 1000 Genomes Populations. **B.** Same as panel A, with addition of UKB South Asian (SAS) and West Asian (WAS) Populations with  $n > 100$ . **C.** Same as panel B, with addition of  $n = 900$  from PGR cohort. **D.** Same as panel C, with Pakistani ancestry clusters labeled ( $n = 300$  Baloch/Pathan,  $n = 300$  Punjabi/Rajput,  $n = 300$  Ansari). **E.** Focus on the PGR to show the major ancestry clusters. Each color on plot represents an individual ancestry and has been labeled accordingly as described in the Population Color Key. The abbreviations of corresponding ancestries as follow: 1000 Genomes Project African Caribbean in Barbados (ACB), 1000 Genomes Project Bengali in Bangladesh (BEB), 1000 Genomes Project Chinese Dai in Xishuangbanna, China (CDX), 1000 Genomes Project Han Chinese South (CHS), 1000 Genomes Project Finnish in Finland (FIN), 1000 Genomes Project Gujarati Indians in Houston, Texas, USA (GIH), 1000 Genomes Project Gambian in Western Division – Mandinka (GWD), 1000 Genomes Project Iberian Populations in Spain (IBS), 1000 Genomes Project Indian Telugu in the U.K. (ITU), 1000 Genomes Project Japanese in Tokyo, Japan (JPT), 1000 Genomes Project Mexican Ancestry in Los Angeles CA USA (MXL), 1000 Genomes Project Peruvian in Lima Peru (PEL), 1000 Genomes Project Puerto Rican in Puerto Rico (PUR), 1000 Genomes Project Punjabi in Lahore, Pakistan (PJI), 1000 Genomes Project Sri Lankan Tamil in the UK (STU), 1000 Genomes Project Toscani in Italia (TSI), 1000 Genomes Project Yoruba in Ibadan, Nigeria (YRI), UKB Country of birth Afghanistan (AFG) ( $n = 112$ ), UKB Country of birth Bangladesh (BAN) ( $n = 246$ ), UKB Country of birth Iran (IRAN) ( $n = 540$ ), UKB Country of birth Nepal (NEPAL) ( $n = 161$ ), UKB Country of birth Pakistan (PAKISTAN) ( $n = 1439$ ), UKB Country of birth Turkey (TURKEY) ( $n = 182$ ), CNCD Baloch/Pathan (BALOCH/PATHAN) ( $n = 3,068$ ), CNCD Punjabi/Rajput (PUN/RAJPUT) ( $n = 20,907$ ), CNCD (ANSARI) ( $n = 10,402$ ).

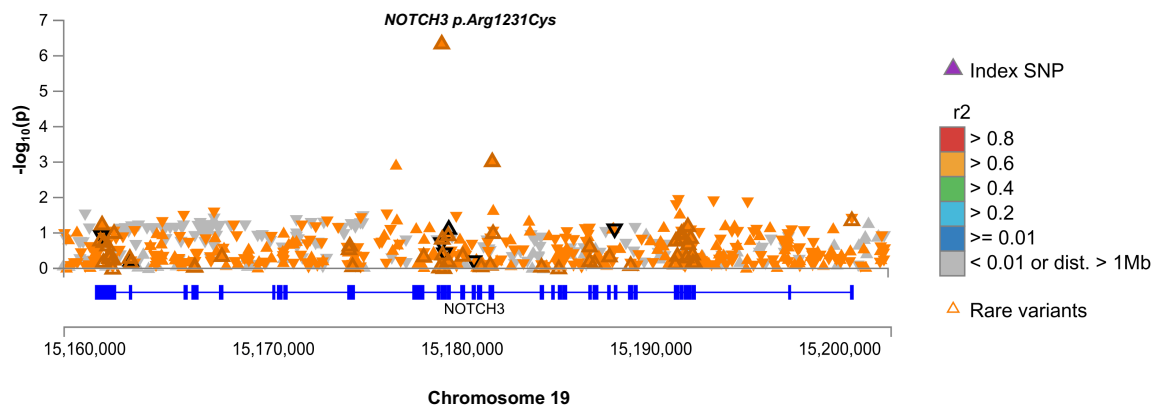

**Supplementary Figure 6. Evidence for Pathological Changes in Brain of p.Arg1231Cys Carriers.** LocusZoom plot of *NOTCH3* for white matter hyperintensity (WMH) in  $n = 35,344$  UKB participants. WMH was one of several brain MRI phenotypes with linear regression test p values below  $1.0 \times 10^{-5}$ . Shown is a plot of the  $-\log_{10} p$  values (y axis) for all *NOTCH3* exome variants, ordered by position (x axis), with p.Arg1231Cys labeled. Variants represented as triangles color-coded by LD with the index SNP.

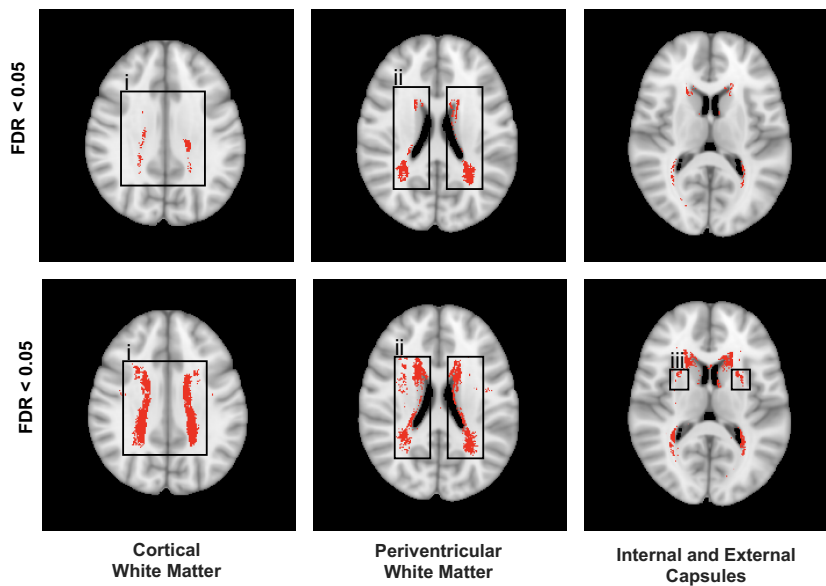

**Supplementary Figure 7. Voxel-wide Heatmap of White Matter Hyperintensity Signal in *NOTCH3* Cys-Altering Mutation Carriers Compared to Controls from UK Biobank.** Shown is the voxel-wide heatmap of white matter hyperintensity (WMH) signal with voxel significant differences calculated by logistic regression in  $n = 35,344$  UKB participants with brain MRI data between (*top*)  $n = 20$  p.Arg1231Cys carriers vs. controls and (*bottom*)  $n = 86$  EGFr Cys-altering variant carriers vs. controls shown in red. (*top*) Signals observed most strongly in (i) the centrum semiovale (cortical white matter) and (ii) the periventricular white matter, to lesser degree in the internal and external capsule white matter. (*bottom*) Signals observed appreciably in (i) the centrum semiovale (cortical white matter), (ii) the periventricular white matter, and (iii) the external capsules bilaterally.

### Supplementary References

1. Genomes Project, C., et al., *A global reference for human genetic variation*. Nature, 2015. **526**(7571): p. 68-74.
2. Karczewski, K.J., et al., *The mutational constraint spectrum quantified from variation in 141,456 humans*. Nature, 2020. **581**(7809): p. 434-443.
3. Scott, E.M., et al., *Characterization of Greater Middle Eastern genetic variation for enhanced disease gene discovery*. Nat Genet, 2016. **48**(9): p. 1071-6.
4. Fattahi, Z., et al., *Iranome: A catalog of genomic variations in the Iranian population*. Hum Mutat, 2019. **40**(11): p. 1968-1984.
5. Rodriguez-Flores, J.L., et al., *The QChip1 knowledgebase and microarray for precision medicine in Qatar*. NPJ Genom Med, 2022. **7**(1): p. 3.
6. Adams, H.P., Jr., et al., *Classification of subtype of acute ischemic stroke. Definitions for use in a multicenter clinical trial. TOAST. Trial of Org 10172 in Acute Stroke Treatment*. Stroke, 1993. **24**(1): p. 35-41.
7. Bamford, J., et al., *Classification and natural history of clinically identifiable subtypes of cerebral infarction*. Lancet, 1991. **337**(8756): p. 1521-6.
8. Skol, A.D., et al., *Joint analysis is more efficient than replication-based analysis for two-stage genome-wide association studies*. Nat Genet, 2006. **38**(2): p. 209-13.
9. Becht, E., et al., *Dimensionality reduction for visualizing single-cell data using UMAP*. Nat Biotechnol, 2018.
10. Mishra, A., et al., *Stroke genetics informs drug discovery and risk prediction across ancestries*. Nature, 2022. **611**(7934): p. 115-123.
11. Backman, J.D., et al., *Exome sequencing and analysis of 454,787 UK Biobank participants*. Nature, 2021. **599**(7886): p. 628-634.
12. Elliott, L.T., et al., *Genome-wide association studies of brain imaging phenotypes in UK Biobank*. Nature, 2018. **562**(7726): p. 210-216.
13. Griffanti, L., et al., *BIANCA (Brain Intensity AbNormality Classification Algorithm): A new tool for automated segmentation of white matter hyperintensities*. Neuroimage, 2016. **141**: p. 191-205.
14. Duvaud, S., et al., *Expasy, the Swiss Bioinformatics Resource Portal, as designed by its users*. Nucleic Acids Res, 2021. **49**(W1): p. W216-w227.
